## Dirichlet-multinomial modelling outperforms alternatives for analysis of microbiome and other ecological count data

Joshua G. Harrison<sup>1,2</sup>, W. John Calder<sup>1</sup>, Vivaswat Shastry<sup>1</sup>, and C. Alex Buerkle<sup>1</sup>

<sup>1</sup>Department of Botany, University of Wyoming, Laramie, WY 82071, USA

<sup>2</sup>*Corresponding author*: Joshua G. Harrison  
1000 E. University Ave.  
Department of Botany, 3165  
University of Wyoming  
Laramie, WY 82071, USA  
joshua.harrison@uwyo.edu  
Fax: 307-766-2851

*Keywords*: compositional data analysis, Dirichlet, hierarchical modelling, microbiome, transcriptome, multinomial, Bayesian statistics, microbial ecology, variational inference, Hamiltonian Monte Carlo, Stan, JAGS, Markov chain Monte Carlo

*Running title*: Dirichlet-multinomial modelling

## Abstract

Molecular ecology regularly requires the analysis of count data that reflect the relative abundance of features of a composition (e.g., taxa in a community, gene transcripts in a tissue). The sampling process that generates these data can be modeled using the multinomial distribution. Replicate multinomial samples inform the relative abundances of features in an underlying Dirichlet distribution. These distributions together form a hierarchical model for relative abundances among replicates and sampling groups. This type of Dirichlet-multinomial modelling (DMM) has been described previously, but its benefits and limitations are largely untested. With simulated data, we quantified the ability of DMM to detect differences in proportions between treatment and control groups, and compared the efficacy of three computational methods to implement DMM—Hamiltonian Monte Carlo (HMC), variational inference (VI), and Gibbs Markov chain Monte Carlo. We report that DMM was better able to detect shifts in relative abundances than analogous analytical tools, while identifying an acceptably low number of false positives. Among methods for implementing DMM, HMC provided the most accurate estimates of relative abundances, and VI was the most computationally efficient. The sensitivity of DMM was exemplified through analysis of previously published data describing lung microbiomes. We report that DMM identified several potentially pathogenic, bacterial taxa as more abundant in the lungs of children who aspirated foreign material during swallowing; these differences went undetected with different statistical approaches. Our results suggest that DMM has strong potential as a statistical method to guide inference in molecular ecology.

## 1 Introduction

2 In many scientific disciplines, data from both manipulative experiments and surveys of nat-  
3 ural variation are often counts of observations that are assigned to categories. Given some  
4 total level of observational effort, the counts of the different features in the sample (e.g.,

5 taxa or transcripts) reflect the underlying proportions of those features in the sampled com-  
6 position (e.g., an assemblage of organisms or collection of molecules). In molecular ecology,  
7 such sampling can take the form of detecting and counting taxa based on observed DNA  
8 sequences (e.g., in molecular barcoding or microbial ecology) or counting the reads assigned  
9 to specific transcripts in studies of gene expression (Fernandes et al. 2014, Gloor et al. 2017,  
10 Tsilimigras and Fodor 2016). For these applications, sampling effort corresponds to the total  
11 number of sequence reads, and the count of reads assigned to a taxon or gene supports infer-  
12 ence of their true proportion in the composition. Moreover, the total number of reads that  
13 can be obtained is constrained by the sequencing instrument, with reads ascribed to samples  
14 and features within each sample. Due to this constant sum constraint, compositional data  
15 have the important quality that as the relative abundance of one feature in the composition  
16 increases, other features must decrease.

17 Molecular ecologists often rely on compositional count data to define differences between  
18 sampling groups. As an example, we may wish to know how the foliar and root microbiomes  
19 of a particular plant taxon differ. To answer this question, an understanding of how each  
20 feature shifts in relative abundance among sampling groups is required. In our view, if even  
21 a single feature shifts in relative abundance among groups, then this demonstrates an effect  
22 of sampling group that could be biologically interesting, albeit subtle. Such effects will go  
23 unnoticed if analyses rely on techniques such as ordination and PERMANOVA, which can  
24 provide insight into overall differences between sampling groups (McKnight et al. 2019), but  
25 provide no statistical model to identify those features that may differ in relative abundance  
26 among groups. Accordingly, a variety of methods have been developed to perform the seem-  
27 ingly simple task of determining treatment-induced shifts in relative abundance, which is  
28 often referred to as “differential relative abundance testing” or “differential expression” test-  
29 ing (the latter phrase arises because the roots of many of these methods lie within the field  
30 of functional genomics; Bullard et al. 2010, Dillies et al. 2013, Paulson et al. 2013, Thorsen  
31 et al. 2016, Weiss et al. 2017).

32 Methods for detecting shifts in relative abundance vary tremendously—and the benefits  
33 and drawbacks of various methods are the subjects of an ongoing dialogue (e.g., Bullard  
34 et al. 2010, McMurdie and Holmes 2014, Weiss et al. 2017). Early approaches typically  
35 relied on repeated frequentist tests after transforming count data to account for differences  
36 in sampling effort among replicates or sampling groups, typically via rarefaction, conver-  
37 sion to proportions, or, for transcriptomic data, reads per kilobase per million mapped reads  
38 (Bullard et al. 2010). More recently, rarefaction has been criticized because it can amplify the  
39 variation present within replicates and thus reduce statistical power (McMurdie and Holmes  
40 2014; but see McKnight et al. 2019 and Weiss et al. 2017 for counterarguments). Numer-  
41 ous statistical modelling approaches have arisen to account for the challenges imposed by  
42 compositional data, while avoiding rarefaction. These methods often model feature relative  
43 abundance and typically involve some form of normalization followed by repeated frequentist  
44 testing. Methods most often differ in the choice of distribution(s) utilized for modelling and  
45 normalization method employed. For example, the software DESeq2 (Love et al. 2014) and  
46 edgeR (Robinson et al. 2010) are widely-used for analysis of gene expression data and, more  
47 recently, for microbiome analysis (Weiss et al. 2017). These tools model feature relative  
48 abundances using a negative binomial distribution (a reparameterization of the Poisson dis-  
49 tribution to allow for overdispersion), which is scaled to account for variation in sequencing  
50 depth among samples (each tool uses different normalization methods). Next a generalized  
51 linear model is used to determine if features differ in relative abundance between sampling  
52 groups. By comparison, the popular ANCOM software applies a centered log ratio trans-  
53 formation (Aitchison 1982) to the data followed by repeated parametric or non-parametric  
54 testing (depending on the data) with multiple comparison correction. These few examples  
55 serve to illustrate the variety of approaches available for performing differential expression  
56 testing. However, we are unaware of any popular method that allows estimates of feature  
57 relative abundance to be easily extracted while preserving the uncertainty in those estimates  
58 for propagation to downstream analyses. This perceived need led us to consider modelling

59 feature relative abundances using the Dirichlet and multinomial distributions (Box 1) in a  
60 Bayesian framework.

61 The multinomial and Dirichlet probability distributions are the relevant models of the  
62 aforementioned sampling process that commonly leads to compositional data. Statistical  
63 modelling using these distributions has proven successful in a number of biological studies.  
64 For instance, Fordyce et al. (2011) rely on Dirichlet-multinomial modelling (DMM) to an-  
65 alyze ecological count data, such as counts of behavioural and dietary choices of animals  
66 (also see Coblenz et al. 2017). Similar models have been applied to large counts of DNA  
67 sequences—for instance, Fernandes et al. (ALDEx2, 2014), Nowicka and Robinson (DRIM-  
68 Seq, 2016), and Rosa et al. (HMP, 2012) use DMM to estimate and compare feature-specific  
69 relative abundances in transcriptomes and microbiomes. Additionally, DMM has been used  
70 to model mixtures of compositions, a situation that could arise in a laboratory-derived mi-  
71 crobial assemblage occurring as a contaminant within samples, or in mixtures of different  
72 communities in nature (MicrobeDMM, Holmes et al. 2012; SourceTracker, Knights et al.  
73 2011; BioMiCo, Shafiei et al. 2015; FEAST, Shenhav et al. 2019; *ecostructure*, White et al.  
74 2019). Likewise, DMM has been used to estimate association networks among microbial  
75 taxa (*SparCC*, Friedman and Alm 2012; *mLDM*, Yang et al. 2017).

76 These models represent important advances and demonstrate the utility of DMM, but  
77 it remains unclear how data attributes, such as rank-abundance profiles and dimensionality,  
78 affect the accuracy and precision of parameter estimates. Moreover, compared to models  
79 that rely on other distributions or are based on different statistical methods (likelihood and  
80 frequentist methods), Bayesian DMM can be computationally demanding. Recent advances  
81 in computational statistics such as Hamiltonian Monte Carlo (HMC) sampling and varia-  
82 tional inference (VI, see Methods; Blei et al. 2017, Monnahan et al. 2017) may improve model  
83 runtime, but the accuracy and performance of these new methods remains to be evaluated  
84 in different modelling contexts.

85 Consequently, we conducted a simulation experiment to learn the limits and benefits of

86 DMM through the analysis of data that encompass much of the variety in attributes encoun-  
87 tered across scientific domains (e.g. replication, number of observations, and so on; Fig. 1).  
88 Notably, included in simulated data, were those emulating the results of high-throughput  
89 sequencing of microbial assemblages, as these are analytically challenging due to their dimen-  
90 sionality, high among-replicate variation, and extreme rank-abundance skew—often several  
91 microbial taxa are orders of magnitude more abundant than the numerous marginal taxa  
92 that typically compose the bulk of biodiversity within a sample (e.g., see Lynch and Neufeld  
93 2015, Sachdeva et al. 2019). Our primary analytical goal was to measure the sensitivity and  
94 accuracy of DMM for comparing feature relative abundance between compositions and to  
95 compare the performance of DMM with competing approaches. Also, we provide a primer  
96 on the requisite algorithmic methods (e.g., VI and HMC) for Bayesian implementation of  
97 DMM and explore how different algorithms affect model accuracy and computational ex-  
98 pense. Finally, we analyzed a data set published by Duvallet et al. (2019) that describes  
99 the lung microbiomes of children experiencing aspiration of foreign material and evaluated  
100 to what extent DMM recapitulated the published analyses or detected additional differences  
101 among microbiomes.

### **Box 1. A brief explanation of the multinomial and Dirichlet distributions**

The multinomial distribution is the multivariate generalization of the binomial distribution. The binomial distribution can be used to describe counts of binary outcomes, with respective probabilities  $p$  and  $1 - p$ . For instance, with a finite sample of observations, the binomial distribution would be useful for estimating the frequency of females ( $p$ ) in a dioecious population. The multinomial distribution extends this concept to encompass more than two unique outcomes. For instance, a composition comprising three equally abundant features would have the the following multinomial parameter vector:  $\vec{p} = [\frac{1}{3}, \frac{1}{3}, \frac{1}{3}]$ . As an example, consider data from a sequencing machine. The counts of sequences that fall into each category (e.g., transcripts or taxa) are multino-

102

mially distributed, with a probability that corresponds to its relative abundance. For three equally abundant features (i.e. microbial taxa), there would be an equal chance of sampling a sequence from each of the features and on average we would expect to obtain the same number of sequences from each (for this example, we assume no laboratory-technique imposed bias).

To share information among samples in the same sampling group (e.g. treatment group, host population, or sampling location) and recover group-level estimates of the proportion of each feature in a composition, the Dirichlet distribution can be appropriately parameterized. The Dirichlet distribution is the multivariate generalization of the beta distribution. Deviates from a standard beta distribution fall in the range of  $[0, 1]$ , and the distribution can be parameterized with expectation  $\pi$  (the expected frequency of the reference category, with  $1 - \pi$  for the alternative category) and a parameter,  $\theta$ , that affects the variation among deviates. Likewise, the Dirichlet distribution can be parameterized by a vector of expected frequencies of each feature ( $\vec{\pi}$ ), and an intensity parameter,  $\theta$ . When drawing deviates from the Dirichlet distribution, the intensity parameter influences the amount of among-deviate variation in the frequencies observed—for a given  $\vec{\pi}$ , larger intensity parameters induce less among-deviate variation. This parameterization of the Dirichlet thus allows modelling of the variation among experimental replicates (the “noise” within the data).

Information about the frequencies of features within replicates ( $\vec{p}$ ) is shared to estimate frequencies for each feature within that sampling group ( $\vec{\pi}$ ), forming a hierarchical model (Fig. 1) that is analogous to how replicates can be used in an analysis of variance to learn about marginal, grand means associated with treatments. Estimates of frequencies of compositional features at the sampling group level ( $\vec{\pi}$ ) are the basis of inferences about which features differ among sampling groups (e.g., treatment versus control) and by how much (on an absolute or normalized scale).

## 104 Methods

### 105 Dirichlet multinomial modelling approach

106 Our specification of the Dirichlet-multinomial model generally follows that of Fordyce et al.  
107 (2011, implemented in the `bayespref` software) and takes as input a matrix of counts ( $\mathbf{X}$ ). The  
108 rows of this matrix correspond to different replicates ( $\vec{x}_i$ ; the superscripted arrow denotes a  
109 vector) and the columns correspond to features of the composition (the format of an OTU or  
110 transcript table). Each count  $x_{ij}$  in this matrix corresponds to the  $j^{\text{th}}$  feature (of  $n$  features  
111 in total) in the composition observed in the  $i^{\text{th}}$  replicate sample. Replicates are grouped  
112 into  $k$  groups, corresponding to treatment conditions, sampling locations, or some other  
113 stratification that specifies which replicates share information (parameters shared among  
114 replicates for the group). Counts in each row of the matrix are multinomially distributed:

$$\vec{x}_i \sim \text{Multinomial}(\vec{p}_i, N_i)$$

115 Each value  $p_{ij}$  in  $\vec{p}_i$  is the probability of observing a particular feature  $j$  in sample  $i$  and  
116  $\vec{N}_i$  is a vector of the total counts in each sample. The product across  $i$  replicates of the  $i$   
117 multinomial distributions forms the likelihood in the model and can be written:

$$P(\vec{x}_{1\dots i} | \vec{p}_{1\dots i}, \vec{N}_{1\dots i}) = \prod_i \frac{N_i!}{x_{i1}! \dots x_{ij}!} p_{i1}^{x_{i1}} \dots p_{ij}^{x_{ij}}$$

118 The prior probability for the vector of feature proportions ( $\vec{p}_i$ ) is a Dirichlet distribution,  
119 with parameters that are specific to the  $k^{\text{th}}$  group of replicates and that are learned from  
120 the data:

$$\vec{p}_i \sim \text{Dirichlet}(\vec{\pi}_k \theta_k)$$

$$\theta_k \sim \text{Uniform}(0, 4000)$$



121 In this parameterization of the Dirichlet distribution for  $\vec{p}_i$ , the  $\vec{\pi}_k$  parameters correspond  
 122 to the expected proportions of each of the  $n$  features (e.g., a particular transcript or taxon)  
 123 in group  $k$ , and  $\theta$  is an intensity parameter that is shared among all features (see Box 1).  
 124 For a given  $\vec{\pi}$ , larger  $\theta$  means less variation among deviates from the Dirichlet expectation  
 125  $\vec{\pi}$ . The probability density function of this distribution, across  $i$  replicates within the  $k^{\text{th}}$   
 126 group, is given by,

$$P(\vec{p}|\vec{\pi}_k, \theta_k) = \frac{1}{B(\vec{\pi}_k\theta_k)} \prod_i \prod_j p_{ij}^{\pi_{ij}\theta_k - 1}$$

$$B(\vec{\pi}_k\theta_k) = \frac{\prod_j \Gamma(\pi_j\theta_k)}{\Gamma(\sum_j \pi_j\theta_k)}$$

127 where  $B(\vec{\pi}_k\theta_k)$  is a normalizing function that ensures the Dirichlet distribution integrates  
 128 to one. The hyperprior for the  $\vec{\pi}_k$  parameters at the “topmost”, or most inclusive, level of  
 129 the model hierarchy is another Dirichlet distribution with equal prior probability for each  
 130 feature within the composition. For this Dirichlet distribution we use  $\alpha_{1\dots n} = 10^{-7}$  as a prior  
 131 that will contribute little information, gives an expected value of  $\frac{1}{n}$ , and has a high variance  
 132 on the expectation:

$$\vec{\pi}_k \sim \text{Dirichlet}(\vec{\alpha})$$

133 The overall model for the posterior distribution for parameters of a sampling group is:

$$P(\vec{p}, \vec{\pi}, \vec{\alpha}, \theta | \mathbf{X}, \vec{N}) \propto \left( \prod_i P(\vec{x}_i | \vec{p}_i, N_i) P(\vec{p}_i | \vec{\pi}, \theta) \right) P(\vec{\pi} | \vec{\alpha}) P(\vec{\alpha}) P(\theta)$$

134 To quantify differences in proportions of features between two sampling groups (often re-  
 135 ferred to as “differential relative abundance testing”; Thorsen et al. 2016, Weiss et al. 2017),  
 136 posterior probability distributions (PPDs) for  $\pi_{j,k=1} - \pi_{j,k=2}$  (Fig. 2d) can be obtained. Con-  
 137 sistent with convention, if 95% of the samples of this PPD of differences are either greater or  
 138 less than zero, then there is a high certainty of a non-zero effect of sampling group on feature

139 relative abundance. One can also observe where zero occurs in the PPD of differences to  
140 quantify the probability of no effect of sampling group on feature relative abundance.

141 If a sampling scheme was used that induces dependence among replicates via a more  
142 nested hierarchical structure than the model described above, then the model hierarchy  
143 could be extended to include inference of the Dirichlet distributions describing the rela-  
144 tive abundances of features within each additional stratum of the sampling scheme. For  
145 example, consider a study design where subjects are provided one of several diets and gut  
146 microbiome samples are taken from both sexes. In this case, one would want to account  
147 for non-independence among the data due to both sex and diet treatment. This can be  
148 accomplished through incorporation of additional Dirichlet distributions into the model,  
149  $P(\vec{\pi}_k | \vec{\psi}_m, \tau)$ , where  $\vec{\psi}_m$  describes the relative abundances of features within each diet treat-  
150 ment ( $m$ ),  $\tau$  is the intensity parameter for that Dirichlet distribution, and  $\vec{\pi}_k$  describes  
151 relative abundances of features within each sex that is nested within each diet treatment. In  
152 this way, the model can be extended to encompass as many hierarchical layers as desired,  
153 given suitable sampling and replication (Coblentz et al. 2017).

### *A primer of the algorithms to perform DMM*

154 One goal of statistical modelling is to estimate values for parameters that could corre-  
155 spond with directly observable variables (i.e. the data) or with latent, unobservable, variables  
156 (i.e. those that are inferred from observable variables). Bayesian modelling attempts to es-  
157 timate parameters of interest, while explicitly quantifying the uncertainty in those estimates  
158 and allowing for the influence of prior knowledge on estimates. Much of Bayesian statistical  
159 modelling relies on Markov chain Monte Carlo (MCMC) sampling (Gelman et al. 2013). A  
160 Markov chain is a series of states where each state depends upon the immediately preceding  
161 state. Monte Carlo refers to repeated, random sampling. MCMC is a process by which values  
162 are suggested randomly from a probability distribution and substituted into the functions  
163 that define the model. Over MCMC iterations, sampling converges on the most supported  
164 parameter space (the PPDs for model parameters) and samples in the chain occur with

165 probability defined by the PPD.

166 There are several MCMC algorithms and they primarily differ in how they choose or  
167 propose new values and their criteria for inclusion of those values in the chain (Gelman et al.  
168 2013). A standard MCMC tool is the Metropolis algorithm (Gelman et al. 2013, pg. 289).  
169 To perform Metropolis sampling, a value ( $x_t$ ) is proposed from some distribution  $Q(x_t|x_{t-1})$ ,  
170 where  $t$  is iteration (a suitable initial value,  $x_0$ , is required). Once  $x_t$  is chosen a ratio of  
171  $\alpha = \frac{f(x_t)}{f(x_{t-1})}$  is calculated, where  $f(x)$  is a function that is proportional to the probability  
172 density to be estimated. The new value  $x_t$  is accepted into the chain with probability  $\alpha$ ,  
173 otherwise  $x_t = x_{t-1}$ . The Metropolis algorithm relies on a symmetric proposal distribution,  
174 such that  $Q(x_t|x_{t-1}) = Q(x_{t-1}|x_t)$ . The Metropolis-Hastings (MH) algorithm extends this  
175 concept through relaxing the assumption of symmetry regarding the proposal probability  
176 distribution.

177 Gibbs sampling (Geman and Geman 1987, Kruschke 2015) is a special case of the MH  
178 algorithm (because the proposal acceptance criterion is always met; see pg. 289 in Gelman  
179 et al. 2013) and is suited for cases when the distributions used within the model are con-  
180 ditionally conjugate, such as when the prior and likelihood distributions are conjugate and,  
181 consequently, their product has a well defined form. At each iteration of Gibbs sampling ( $t$ ),  
182 each parameter is sampled from the conditional distribution defined by the other parameters  
183 in the model, which are held constant at values chosen at iteration  $t - 1$ . Parameters are  
184 typically updated one at a time, in a predefined order.

185 The probabilistic programming language JAGS (Plummer 2003) implements Gibbs and  
186 Metropolis-Hastings MCMC as required to obtain samples from the distributions in our  
187 DMM. Henceforth, we refer to parameter estimation via Gibbs, Metropolis, and Metropolis-  
188 Hasting sampling as MCMC. These algorithms can be slow to converge for complex models;  
189 indeed in our experience, in a JAGS implementation, convergence may not be observed for  
190 the majority of parameters over a week of runtime for DMM with high dimensional data (such  
191 as transcriptomic data), even with sensible chain initialization values (a bespoke software

192 implementation of MCMC tuned to the data and model would likely be faster, but would  
193 require greater care in programming and use).

194 Hamiltonian Monte Carlo (HMC) seeks to improve upon the efficiency of MCMC through  
195 the use of a physics inspired algorithm (for an excellent description of HMC see Monnahan  
196 et al. 2017). The sampling method can be envisioned by considering a ball dropped into a  
197 bowl and allowing the ball to roll about the curvature of the bowl. The bowl is the PPD and  
198 is frictionless, so the ball will roll back and forth in the bowl forever. After repeated drops of  
199 the ball into the bowl, from different angles and with different potential energies, the shape  
200 of the PPD is determined from the combined paths the ball took across all iterations. The  
201 benefit of this approach is that samples from nearly anywhere in the PPD can be generated  
202 at each iteration (HMC does not use a Markov chain process, but does rely on a Metropolis  
203 ratio to determine acceptability of updates), whereas MCMC typically chooses values based  
204 on the previous state space and thus cannot quickly move throughout the PPD, which can  
205 slow chain mixing and time to convergence. The probabilistic programming language and  
206 software **Stan** allows the use of an improved version of HMC called the “no U-turn” sampler  
207 that avoids redundant sampling of parameter space (Hoffman and Gelman 2014). To continue  
208 the previous analogy, when the ball starts to make a U-turn due to the curvature of the bowl,  
209 the sampler is stopped, and the ball dropped again—thus avoiding spending sampler time  
210 in previous explored parameter space.

211 HMC often improves model runtime (Monnahan et al. 2017) over MCMC, but can still  
212 be quite time consuming. Variational inference is a class of optimization methods from the  
213 machine learning literature that can rapidly approximate PPDs (Blei et al. 2017), and thus  
214 holds great promise for statistical modelling of complex data where the speed of MCMC or  
215 HMC is insufficient. Variational inference (VI) has yet to be widely applied by biologists,  
216 but it has been used to estimate population genetic structure (e.g. Raj et al. 2014, Scordato  
217 et al. 2017), genotype-phenotype associations (Carbonetto and Stephens 2012, Logsdon et al.  
218 2010), phylogenetic relationships (Jojic et al. 2004), and in a generalized latent linear mod-

219 elling context (Niku et al. 2019).

220 The idea behind VI is that the exact PPD need not be estimated, but can be approxi-  
221 mated through optimization of parameters of more tractable distributions. Briefly, a density  
222 is chosen from a family of distributions and optimized so that the Kullback-Leibler (KL)  
223 divergence between that density and the PPD is minimized. KL divergence relies on the  
224 definition of entropy. Entropy is a measure of the information present within a distribution  
225 and can be expressed (for a discrete probability distribution):

$$H = - \sum_{i=1}^N p(x_i) \log p(x_i)$$

226 where  $p(x)$  is a function that outputs a probability contingent upon an input value  $x$ , which  
227 is indexed by  $i$ . It is perhaps easiest to intuit entropy using  $\log_2$ , in which case  $H$  is the  
228 minimum number of bits needed to encode the data. KL divergence extends this idea to  
229 quantify the amount of information necessary to explain the divergence ( $\|$ ) between two  
230 probability distributions  $p$  and  $q$ , which, in this example, are discrete:

$$D_{KL}(p||q) = \sum_{i=1}^N p(x_i) (\log p(x_i) - \log q(x_i))$$

231 Because this measure of divergence is based on the quantification of entropy, when  $p$   
232 and  $q$  differ greatly, then more information is required to explain how they differ and KL  
233 divergence increases. For VI we wish to minimize the KL divergence between the probability  
234 distribution  $p(\vec{z}|\vec{x})$  and some density  $q(\vec{z})$  chosen from a family of distributions  $Q$ . To avoid  
235 computation of  $p(\vec{x})$  (see Blei et al. 2017, for more), minimizing the KL divergence can  
236 be solved by maximizing the “evidence lower bound” (ELBO; the  $\mathbb{E}$  used below refers to  
237 expectation):

$$\text{ELBO}(q) = \mathbb{E}[\log p(\vec{z}, \vec{x})] - \mathbb{E}[\log q(\vec{z})]$$

238 The ELBO is the negative of KL divergence after adding the constant  $\log p(x)$ . Thus  
239 maximizing the ELBO is equivalent to minimizing the KL divergence, up to the added  
240 constant. This also means that:

$$\log p(\vec{x}) = D_{KL}(p||q) + ELBO(q)$$

241 The ELBO describes the lower bound of the evidence, because when the ELBO is sub-  
242 tracted from the evidence ( $\log p(x)$ ) the result must be  $\geq 0$ , because KL must be  $\geq 0$ .  
243 Because maximizing the ELBO does not require computing  $\log p(\vec{x})$  it is easier than mini-  
244 mizing KL divergence. Maximization techniques can then be used to find the density  $q^*(\vec{z})$   
245 that best approximates  $p(\vec{z}|\vec{x})$ .

246 Choosing  $Q$  such that the family of densities includes a  $q^*(\vec{z})$  that provides a good ap-  
247 proximation, while being easily optimized, is the challenge of VI. **Stan** solves this problem  
248 through a method called “automatic differentiation variational inference” (Kucukelbir et al.  
249 2015) by first transforming the data that are the support of the latent variables to lie within  
250 the real numbers ( $\mathbb{R}$ ) and then suggesting a Gaussian distribution, which can be optimized  
251 to fit the data, and which induces a non-Gaussian approximation to the untransformed data.  
252 **Stan**’s default approach uses the “mean-field” algorithm, which treats latent variables ( $z_j$ )  
253 as independent and assigns a unique density,  $q_j(z_j)$ , to each of these  $j$  variables. Since **Stan**  
254 transforms the data such that latent variables have support on  $\mathbb{R}$  and then fits Gaussian  
255 distributions to those data, this statement becomes the product of many Gaussian distribu-  
256 tions, each of which are optimized to minimize the ELBO. Following the notation of Blei  
257 et al. (2017), this can be written:

$$q(\vec{z}) = \prod_{j=1}^m q_j(z_j)$$

258 VI is an attractive technique because it can be many orders of magnitude faster than MCMC  
259 (e.g. Raj et al. 2014). However, it is unclear how well VI works across analytical tasks and

260 model specifications (Blei et al. 2017).

## 261 **Model implementation**

262 We performed DMM in the R statistical computing environment (R Core Team 2019) using  
263 models specified for the JAGS and Stan (Carpenter et al. 2017) software programs, and used  
264 the models through the `rjags` (Plummer 2015) and `rstan` (Stan Development Team 2018) R  
265 packages, respectively. JAGS uses MCMC (Gibbs and MH), whereas Stan implements HMC  
266 (no U-turn sampling) and VI. Model specification for use in Stan was slightly modified from  
267 that described above in that we used an exponential distribution as the form of the prior for  
268  $\theta_k$ :

$$\theta_k \sim \text{Exponential}(\lambda = 0.001)$$

269 This change in model specification followed the recommendation to avoid uniform priors  
270 provided in the Stan documentation.

271 For HMC and MCMC implementations of DMM, we used two chains to explore parameter  
272 space. Initial values for  $\vec{p}_i$  in each chain were the vector of proportions observed from the  
273 data in replicate  $i$ , and values for  $\vec{\pi}_k$  were initialized using the vector of observed proportions  
274 for each feature across replicates within  $k$  (i.e., the maximum likelihood estimates for  $\vec{p}_i$   
275 and  $\vec{\pi}_k$ ).  $\theta$  was left to be initialized internally by `rjags` and `rstan`. In `rjags`, the model  
276 was subjected to an adaptation period long enough for the sampler to approach optimal  
277 efficiency as determined via internal heuristics, or for 20,000 iterations, whichever came first.  
278 Models were updated (“burned in”) for 300,000 steps for `rjags` and 1000 steps for `rstan` (with  
279 a maximum tree depth of 10). This discrepancy in burn in time was needed because in  
280 preliminary work we observed much quicker convergence with HMC than MCMC sampling.  
281 We obtained 1000 samples from PPDs by saving every second sample for HMC, and 2000  
282 samples from PPDs for MCMC by saving every fourth sample.

283 Preliminary inspections of samples showed higher auto-correlation of parameter esti-  
284 mates for MCMC sampling, hence we discarded more samples (higher thinning rate) from  
285 the MCMC-derived chains. MCMC convergence was evaluated via the Gelman-Rubin and  
286 Geweke statistics (Geweke 1991, Gelman and Rubin 1992). We note that the runtime of  
287 MCMC could likely be improved by optimizing adaptation, burn in, and sampling steps  
288 within JAGS, or by implementing a custom MCMC procedure in the C (or an equivalent)  
289 programming language. Data with different dimensions and variance among samples would  
290 likely require different optimizations, so we have not further pursued optimization of the  
291 MCMC herein. To perform variational inference we used the functionality included within  
292 Stan (the “vb” function; Kucukelbir et al. 2015) and collected 1000 samples from the esti-  
293 mated posterior distributions.

294 The ability of models to recover true simulation parameters was estimated via root mean  
295 square error (RMSE) and the percentage of times the true simulation parameters were within  
296 the 95% high density intervals (HDIs) of PPDs (as per Kruschke 2015, pg. 727). For uni-  
297 modal, symmetric PPDs, the HDI and equal-tailed probability interval should be identical  
298 (Gelman et al. 2013, pg. 38). We measured model bias as the average difference between  
299 estimated parameters and the truth and we measured model precision as  $\frac{TP}{TP+FP}$ , where TP  
300 refers to true positives and FP to false positives. False positive rate was calculated as  $\frac{FP}{FP+TN}$ ,  
301 where TN is true negatives. Additionally, we calculated Matthew’s Correlation Coefficient  
302 (MCC; Matthews 1975), which provides a measure of classifier performance in terms of both  
303 true and false positives and negatives. MCC is the correlation between actual and predicted  
304 classifications and varies from one (perfect classification) to negative one (completely incor-  
305 rect classification). An MCC value of zero denotes a classifier that performs no better than  
306 expected from random guessing.



## 307 Data simulation

308 To evaluate the performance of DMM implementations and alternative statistical methods  
309 (see below), we simulated and analyzed data with two sampling categories ( $k$ ), correspond-  
310 ing to treatment and control groups, or some other blocking factor of interest (Fig. 2). We  
311 simulated data that possessed three different rank abundance profiles that were meant to  
312 correspond to the variety of data encountered by practitioners (Fig. 2). We considered  
313 simulations in which all features were equally abundant ( $\frac{1}{n}$ ), and two sets of simulations  
314 in which features were sampled from Pareto distributions with differing shape parameters.  
315 The Pareto distribution describes data with few abundant features and many rarer features  
316 (Krishnamoorthy 2006). The skew towards low abundance in this distribution is controlled  
317 by the shape parameter, with smaller parameters increasing skew (Fig. 2); the location pa-  
318 rameter defines the minimum value of the distribution. For each simulation, we sampled one  
319 of these distributions to populate a vector ( $\vec{D}$ ) of length corresponding to the approximate  
320 desired number of features ( $n$ ) within the simulated data:

$$\begin{aligned}\vec{D} &= D_{1\dots n} = \frac{1}{n} \\ \vec{D} &\sim \text{Pareto}(\text{shape} = 0.7, \text{location} = 1) \\ \vec{D} &\sim \text{Pareto}(\text{shape} = 4, \text{location} = 1)\end{aligned}$$

321  $\vec{D}$  was duplicated to make a second vector,  $\vec{E}$ . Selected features within these vectors  
322 were multiplied by an effect size (either 1.1, 1.5, or 2, to simulate 10%, 50%, or 100%  
323 shifts in feature relative abundance), such that those elements differed between  $\vec{D}$  and  
324  $\vec{E}$ . Features that varied between vectors were chosen randomly from within each of three  
325 broad abundance classes (abundant, rare, and intermediate; see Electronic Supplementary  
326 Material) present within  $\vec{D}$  and  $\vec{E}$ . Only features of intermediate abundance were available  
327 when constraining all relative abundances to be equal. Effect sizes were applied so that  
328  $\sum \vec{D} = \sum \vec{E}$ . These two vectors were multiplied by a specified intensity parameter  $S$

329 and used as the parameters for two Dirichlet distributions that were sampled to create  $\vec{v}$   
330 parameter vectors for multinomial distributions corresponding with each replicate. In this  
331 way, we simulated a replicate by feature matrix where replicates were split into two treatment  
332 groups and known features differed between treatment groups. Simulated data sets often  
333 had fewer features than the originally specified value for  $n$ , because when drawing deviates  
334 from multinomial distributions with many rare features, all features would not be observed  
335 in each deviate (for a visual depiction of simulation approach see Fig. 2).

336 Using this approach, we simulated data from each sampling distribution that varied in  
337 dimensionality (number of features,  $\in \{500, 2000\}$ ), number of replicates ( $\in \{10, 50\}$ ), the  
338 total number of observations per replicate (e.g., the number of reads per sample for sequenc-  
339 ing data;  $\in \{10000, 50000\}$ ), the variation (noise) among replicates ( $\in \{0.5, 3\}$ ; the intensity  
340 parameter in notation provided above), and the effect size applied to features that differed  
341 between sampling groups ( $\in \{1.1, 1.5, 2\}$ ; to apply the effect size transformation, these val-  
342 ues were multiplied by the original proportion. In total, we created and analyzed 144 data  
343 sets. Because the same number of observations were used for each replicate, transformation  
344 of the data to account for unequal sampling effort was not required. After simulating data  
345 matrices, we added a one to every datum, and thereby avoided numerical errors in JAGS  
346 that arise with Dirichlet parameters approaching zero.

347 For our main simulation, we did not vary read counts among replicates for the sake of  
348 simplicity, however to ensure that this did not bias our results we simulated data where  
349 replicates differed by up to two orders of magnitude in total observations (read count).  
350 To accomplish this, multinomial deviates were obtained as described above, however the  
351 total number of draws from the multinomial distribution was randomly selected from  $\in$   
352  $\{1000, 10000, 100000\}$ . Data used for this additional analysis were simulated using a rep-  
353 resentative subset of the aforementioned attributes. Additionally, to better understand the  
354 false positive rate of DMM, we simulated and analyzed data where no features were expected  
355 to differ between treatment groups, again using a representative subset of the attributes pre-

356 sented above to simulate data.

357 We competed our implementations of DMM against ALDEx2 v1.14.1 (Fernandes et al.  
358 2014), ANCOM v2.0 (Mandal et al. 2015), DESeq2 v1.18.1 (Love et al. 2014), edgeR v3.20.9  
359 (Robinson et al. 2010), mvabund v4.0.1 (Wang et al. 2019) and a frequentist approach using  
360 repeated Wilcoxon rank sum tests with a Benjamini-Hochberg false discovery rate (FDR)  
361 correction (Weiss et al. 2017). We used multiple comparison correction and typical set-  
362 tings for all software (see the Supplemental Material). Of the aforementioned methods, only  
363 ALDEx2 relies upon DMM. ALDEx2 estimates posterior probability distributions of Dirichlet  
364 parameters, which are subsequently transformed via the centered log ratio (Aitchison 1982).  
365 Transformed MCMC samples are subjected to a frequentist test of differential relative abun-  
366 dance between sampling groups,  $p$  values calculated, and the distribution of  $p$  values across  
367 MCMC samples obtained (with multiple comparison correction applied as desired by the  
368 user). The mean of this distribution is used as a point estimate of the significance of treat-  
369 ment. mvabund relies on a generalized linear model, in our case using a negative binomial  
370 distribution, to determine differential relative abundance. Each feature in the simulated  
371 data was a response variable and treatment group was the categorical predictor variable in  
372 the model. If the effect of the predictor was significant then the feature differed between  
373 treatment groups in relative abundance. mvabund is thus quite similar to edgeR and DESeq2,  
374 however those methods use different normalization strategies.

375 Our implementation of DMM differs from these methods in several important ways:  
376 1) most competing methods do not rely on the Dirichlet and multinomial distributions,  
377 which explicitly model compositions (except ALDEx2); 2) we use a more complex hierar-  
378 chical structure than the other methods tested to share information among replicates and  
379 sampling groups; 3) we do not perform repeated frequentist tests to determine differences in  
380 feature relative abundance, but instead directly subtract posterior probability distributions  
381 for parameters of interest and observe the location of zero in the resulting distribution of  
382 differences.

383 For all methods, we evaluated how data attributes (e.g. number of replicates, features,  
384 etc.) influenced model performance via multiple regression, with either the proportion of  
385 true positives recovered or false positive rate as the response variable.

## 386 **Analyses on empirical data**

387 To understand how DMM could affect inferences made using previously published, empiri-  
388 cal data, we analyzed data from Duvallet et al. (2019) describing the lung microbiomes of  
389 children with and without oropharyngeal dysphagia (swallowing difficulties) induced aspira-  
390 tion (when a foreign substance enters the lungs). These authors characterized the bacterial  
391 assemblages in the lungs (obtained via bronchoalveolar lavage; BAL), gastric fluid, and  
392 oropharyngeal region (OR) of each subject via sequencing of the 16S locus. Aspiration is  
393 linked to pneumonia in both adults and children (Holas et al. 1994, Marik 2001, Thomson  
394 et al. 2016), but the provenance of aspirated microbes is poorly understood. Duvallet et al.  
395 (2019) showed that the lung microbiome of patients with difficulty swallowing is more simi-  
396 lar to the microbiome of the oropharyngeal region than that of gastric fluid. These authors  
397 performed differential relative abundance testing using Kruskal-Wallis tests with a multiple  
398 comparison correction to determine whether certain bacterial taxa shifted in relative abun-  
399 dance between aspirating and non-aspirating patients. The authors did not find any taxa  
400 that differed in relative abundance, regardless of substrate examined (BAL, gastric fluid, or  
401 OR), though they did detect shifts in prevalence (presence across subjects within a sam-  
402 pling group) with phenotype, and suggested that microbial exchange between the lungs and  
403 oropharyngeal region is greater than between the lungs and stomach. Using DMM (both VI  
404 and HMC; implemented as described above) and all aforementioned competing analyses, we  
405 reanalyzed the publicly available BAL data from aspirators and non-aspirators. The data we  
406 analyzed were obtained from 66 patients (33 aspirators, and 33 non-aspirators) and included  
407 4006 OTUs (for details of sequence processing see Duvallet et al. 2019).

## 408 Results

409 Dirichlet-multinomial modelling (DMM) provided a good compromise between true positive  
410 recovery and false positive generation (Fig. 3 & S2), as shown through analysis of data simu-  
411 lated in the context of a treatment-control experimental design. DMM consistently detected  
412 many more true positives than competing methods (Fig. 4) and this sensitivity facilitated  
413 detection of subtle shifts in relative abundance between sampling groups. For instance, when  
414 analyzing data with a skewed rank abundance profile, DMM detected approximately 15–20%  
415 of features that were shifted by treatment by just 10% of their relative abundance. None of  
416 the other methods that we employed were able to reliably detect these subtle effects (Fig. 3).  
417 When effect sizes were larger, DMM recovered more than 80% of true positives on average,  
418 which was 20–40% more true positives than were recovered by DESeq2, the next best model  
419 in terms of sensitivity.

420 The sensitivity of DMM came at the cost of a slightly higher false positive rate and a  
421 loss of precision compared to other methods (Figs. 3 & S1). Precision was generally high  
422 for uniformly distributed data and when the effect size that described the shift in relative  
423 abundance of a feature was large, however for data with skewed rank abundance profiles the  
424 precision of DMM was lower than competing methods. When considering the Matthew's  
425 correlation coefficient (MCC), DMM typically performed as well or better than competing  
426 approaches examined (Fig. S2). MCC is a more holistic index of classifier performance than  
427 precision because it encompasses true and false positives and negatives. *mvabund*, ANCOM,  
428 and, for some data sets, Wilcoxon tests also performed quite well by this metric.

429 We observed that the FPR was adversely affected by the rank abundance skew within  
430 the data. Analysis of data that was simulated such that no features were expected to differ  
431 among treatment groups revealed that for data simulated from a uniform distribution FPR  
432 was negligible (0%, Fig. S3). However, FPR for HMC increased to 5.4% on average for  
433 data simulated such that they had a highly skewed rank abundance profile (Pareto shape

434 parameter of 0.7). When data were of intermediate skew (Pareto shape of 4) then FPR  
435 increased to 8.2%. We also found that high among-replicate variation in sampling depth  
436 tended to increase FPR by a few percentage points (Fig. S4). On average, FPR of VI was  
437 only slightly higher than HMC. By comparison, FPR was often much higher when DMM  
438 was implemented via MCMC. Indeed, in many cases, MCMC generated an unacceptably  
439 high FPR of over 20%. This high FPR is at least partially due to the lack of convergence  
440 we observed for many parameters when using MCMC, even when we employed lengthy run  
441 times. We observed broadly comparable results from our primary simulation experiment,  
442 which spanned data with a broader variety of attributes and for which features differed in  
443 relative abundance among sampling groups (Fig. 3).

444 Of the analytical tools examined, DESeq2 and edgeR were the next most sensitive behind  
445 DMM. DESeq2 maintained a lower false positive rate than DMM. ANCOM, ALDEx2, and  
446 Wilcoxon tests all exhibited negligible false positive rates, but were only able to identify a  
447 small fraction of the features that shifted in relative abundance between sampling groups. All  
448 methods, including DMM, performed poorly when confronted with data where all features  
449 were equally abundant (denoted as “uniform” in figures). This was unsurprising, because,  
450 for these data, the expectation of  $\pi$  was approximately one divided by the number of features  
451 present and large, marginal shifts in relative abundance between sampling groups (such as  
452 doubling) still resulted in very small differences in proportions (e.g.  $\frac{1}{2000}$  versus  $\frac{2}{2000}$ ), which  
453 were difficult to estimate.

454 We used multiple regression to test how data attributes influenced true positive detection  
455 and false positive rate (Tables S2, S3). For all methods competed, the degree of rank abun-  
456 dance skew within the data had, by far, the largest effect on model performance. Surprisingly,  
457 all methods were quite insensitive to variation in other data attributes. Data dimensional-  
458 ity (number of features), number of replicates, number of observations, and among-replicate  
459 variation had very minor influences on true positive detection and false positive rate for most  
460 methods tested (Tables S2, S3).

461 While our primary goal was ascertaining the relative merits of DMM for detecting differ-  
462 ences in feature abundance, we also asked how well DMM could recover the relative abun-  
463 dances ( $\vec{D}$  and  $\vec{E}$ ) that were used to simulate data. We report very low average root mean  
464 square error (RMSE) for estimates of simulated relative abundances ( $\vec{D}$  and  $\vec{E}$ ) obtained  
465 through DMM (Fig. 5). As a complementary test of model performance, we determined  
466 how often the parameters used to simulate data fell within the high density interval (HDI)  
467 of PPDs. When feature relative abundances were equal, or modestly skewed (“Equal” or  
468 “Pareto, shape = 4”), the HDI of PPDs encompassed the value used to simulate data for  
469 nearly all parameters of interest, regardless of estimation method employed (MCMC, VI, or  
470 HMC; Fig. S5). Parameter estimation was much more difficult for highly skewed data—when  
471 using MCMC or VI, the true values for the parameters did not lie within the estimated HDIs  
472 in some cases. By comparison, HMC did better when confronting these challenging data—on  
473 average ~90% of simulation parameters fell within the HDI, though there was wide variation  
474 in model performance depending upon data set (Fig. 3). We observed that the width of  
475 credible intervals for  $\pi$  parameters was not associated with relative abundance regardless  
476 of implementation method or dataset (Fig. S16–S18). Bias of DMM differed among im-  
477 plementations, with HMC having negligible bias (Figs. S7, S8, S9) and VI and MCMC  
478 exhibiting comparatively more bias. We observed that, for all implementations, bias, when  
479 present, was typically limited to the most abundant and rarest features within the dataset.  
480 Specifically,  $\pi$  parameters were occasionally slightly underestimated for abundant features  
481 and overestimated for rare features. This pattern was more noticeable for highly skewed data  
482 and can be explained given the prior we used for  $\pi$  parameters, which corresponded to  $\frac{1}{n}$ ,  
483 where  $n$  was the number of features. For skewed data with high among-replicate variation,  
484 the strength of the prior was not overcome by the likelihood, thus leading to slight overesti-  
485 mation of marginal features and underestimation of abundant features. If among-replicate  
486 variation was reduced, then DMM was able to accurately recover true parameters even for  
487 highly skewed data. The prior we chose was agnostic to rank-abundance curves and thus

488 suitable for a wide-range of applications, but could be substituted for a prior with a specific  
489 rank-abundance profile if desired by the user.

#### 490 **Inferences on empirical data**

491 Reanalysis of data provided by Duvallet et al. (2019) demonstrated the sensitivity of DMM.  
492 Using HMC, we found that 53 taxa within the lung microbiome (samples were obtained via  
493 bronchoalveolar lavage) shifted in relative abundance between aspirating and non-aspirating  
494 children (Fig. S19). This contrasts dramatically with the results we obtained from repeated  
495 Wilcoxon tests with a Benjamini-Hochberg false discovery rate correction, `mvabund`, and  
496 `ALDEx2`, which suggested no taxa significantly shifted in relative abundance between sam-  
497 pling groups. By comparison, `DESeq2` suggested 17 taxa differed, `edgeR` suggested ten taxa,  
498 and `ANCOM` four taxa.

499 Analysis of lung microbiome data using VI and HMC based implementations of DMM  
500 provided largely similar results; however, VI did report five fewer taxa shifted in relative  
501 abundance than did HMC. The majority of taxa identified by HMC were also identified by  
502 VI; the two methods did not agree regarding true positive status for only nine taxa. Of  
503 the 53 taxa that we found shifted between sampling groups, the most dramatic change was  
504 in a *Streptococcus* taxon, which was much more abundant in aspirating children (Fig. S19).  
505 An increase in this taxon has previously been reported in adult humans with pneumonia  
506 by Akata et al. (2016). We also found an increase in *Haemophilus* (Norman M. Jacobs and  
507 Harris 1979), *Moraxella* (Claesson and Leinonen 1994), *Neisseria* (Johnson et al. 1981), and  
508 *Prevotella* (El-Solh et al. 2003), all of which have previously been associated with pneumo-  
509 nia (see citations for examples), but may be present in healthy lung tissue as well (Beck  
510 et al. 2012). We also observed an increase in *Enterobacter*, *Lactococcus*, *Leuconostoc*, and  
511 *Acinetobacter* taxa in the lungs of non-aspirating subjects.



## 512 Discussion

513 Over the past decade, there has been considerable discussion regarding how molecular ecol-  
514 ogists should process and analyze compositional data, particularly those generated by high-  
515 throughput sequencing instruments (e.g., see Knight et al. 2018, Thorsen et al. 2016, Weiss  
516 et al. 2017). This dialogue has been motivated by the constraints of modern laboratory  
517 equipment (e.g., the constant sum constraint of sequencers) coupled with a pressing need for  
518 consensus involving appropriate, sensitive tools to analyze data generated by such instru-  
519 ments. Through analysis of simulated data spanning the variation in attributes expected  
520 across many scientific domains, we report that new computational statistical techniques have  
521 made Dirichlet-multinomial modelling (DMM) an approach that can be applied efficiently in  
522 many settings. Specifically, we report that DMM is much more sensitive than the competing  
523 approaches we examined, making DMM particularly well suited to identification of subtle  
524 shifts in relative abundance among features, such as what might be required in the study of  
525 rare, but consequential, microbes or metabolites (Lynch and Neufeld 2015, Sachdeva et al.  
526 2019). Indeed, for some data, DMM identified many times more true positives than certain  
527 competing methods (up to approximately eight times more in extreme cases; Fig. 3). The  
528 sensitivity of DMM does, however, come at the cost of an increase in false positive rate  
529 (FPR) and a loss of precision compared to competing methods, particularly for data with  
530 skewed rank abundance profiles and large variation in sampling depth among replicates. For  
531 such challenging data, FPR increased to between 5.5–10% (Fig. S3), which we suggest may  
532 be acceptable for those practitioners tasked with analyzing challenging data and that wish  
533 to avoid missing features that truly differ among compositions. The tradeoff between sensi-  
534 tivity (also referred to as “recall”) and precision is well known (Buckland and Gey 1994) and  
535 we suggest that the suitability of DMM will depend on the particular needs of the practi-  
536 tioner. If practitioners are interested primarily in sensitivity, then our results suggest DMM  
537 is an appropriate method to choose. If, on the other hand, practitioners wish to avoid false  
538 positives, even at the expense of considerable loss of sensitivity, then other methods may be

539 more suitable.

540       Aside from sensitivity, DMM provides several important ancillary benefits including the  
541 estimation of parameters that describe the data under consideration and the ability to prop-  
542 agate uncertainty in those estimates to downstream analyses. Propagation of uncertainty  
543 allows for a precise statement regarding the credibility of an inference and is a particular  
544 benefit of Bayesian techniques over frequentist methods. For example, to determine the  
545 extent that specific features shifted from one simulated sampling group to another, we ob-  
546 tained the difference between PPDs of Dirichlet  $\vec{\pi}$  parameters from each group (Fig. 2d). A  
547 PPD is a distribution that explicitly describes the probability of certain values for a par-  
548 ticular model parameter; thus, in the model described here, the mean of the PPD for a  
549 specific  $\pi$  parameter is a sensible point estimate for that feature’s relative abundance and  
550 the variation around that mean describes the certainty in that estimate. By subtracting  
551 PPDs for  $\pi$  parameters obtained from different sampling groups for a focal taxon, we obtain  
552 a PPD of differences, thus propagating uncertainty in relative abundance estimates through  
553 to differential relative abundance testing (Fig. 1). This provides a great deal of flexibility  
554 to practitioners, because the location of zero in this distribution of differences quantifies the  
555 probability that the two original PPDs differed—in other words, that the feature differed in  
556 relative abundance between sampling groups. We assumed that, for some feature  $i$  present  
557 in two sampling groups  $k$ , if 95% of the PPDs for  $\pi_{ik}$  did not overlap, then that feature  
558 differed in relative abundance between groups (see methods). If a more conservative analy-  
559 sis is desired, then a more strict criterion could be employed to determine if PPDs of focal  
560 features are sufficiently divergent, for instance 98% or 99%. Similarly, a less strict criterion  
561 could be used (e.g., 90%) for exploratory analyses. Moreover, because we precisely quantify  
562 uncertainty in parameter estimates derived from a single model, multiple comparison testing  
563 is unneeded for our implementation of DMM. A final benefit of quantifying uncertainty for  
564 each feature of interest is that, with some creativity, this uncertainty can be propagated to  
565 other downstream analyses, including those using derived parameters of interest such as di-

566 versity entropies (see Supplemental Material and Marion et al. 2018). The benefits provided  
567 by uncertainty propagation are primary differences between DMM as we describe it here and  
568 the competing approaches we tested that rely on some form of frequentist testing.

569 Another important benefit of the approach to DMM we describe is the hierarchical shar-  
570 ing of information among replicates from sampling groups (also see Fordyce et al. 2011).  
571 Hierarchical models make thorough use of the information present within the data, which  
572 can improve parameter estimates and propagate uncertainty, particularly when sampling  
573 effort is inconsistent among replicates and sampling groups (Coblentz et al. 2017). As de-  
574 scribed in the methods, hierarchical modelling can be used in a way analogous to frequentist,  
575 mixed effects modelling to account for non-independence among replicates through the use  
576 of a random effect (Bates et al. 2015, Björk et al. 2018). Hierarchical modelling also allows  
577 for novel inferential opportunities, given sufficient data, because parameter estimates can be  
578 extracted from any level in the model hierarchy.

### 579 **Additional considerations pertaining to Dirichlet-multinomial modelling**

580 A downside to Bayesian modelling is its computational expense. While JAGS (Plummer  
581 2003), BUGS (Lunn et al. 2012), Stan (Carpenter et al. 2017), and PyMC3 (Salvatier et al.  
582 2016) have greatly simplified Bayesian model specification and implementation, Bayesian  
583 analysis can require much more computational time than frequentist methods. Users should  
584 be aware that as the number of parameters to estimate increases, so too does modelling time.  
585 For data sets of low to moderate dimensionality (i.e. less than a thousand features), the model  
586 described herein can be run on a desktop computer within several hours using any of the  
587 three PPD estimation methods (VI may take only a few seconds to run for such small data).  
588 However, for larger data sets of many thousand features, convergence when using MCMC  
589 or HMC may require a multiple days. For larger data, MCMC sampling should probably  
590 be avoided because HMC, as implemented in Stan is much faster and results in convergence  
591 for more parameters and, thus, a lower false positive rate (Fig. S6). For extremely large

592 data, VI may be the only viable option for efficient parameter estimation. Unfortunately,  
593 we observed heightened variation in the performance of VI compared to MCMC or HMC  
594 when confronting data with a dramatic rank abundance skew—in some cases VI did as well  
595 as HMC, but in other cases it was unable to recover a high proportion of the true positives  
596 present (Fig. 3). Computational implementations of VI are a topic of current research  
597 and will undoubtedly improve over coming years (Blei et al. 2017). For most users, we  
598 suggest performing an initial analysis using both HMC and VI. If parameter estimates are  
599 largely congruent between techniques (as we generally observed), then VI could be used for  
600 subsequent analyses using similar data, thus taking advantage of VI’s efficiency.

601 For HMC or MCMC sampling, time to convergence can be improved through initializing  
602 the chains at sensible values for all parameters. We initialize chains for multinomial and  
603 Dirichlet parameters at their maximum likelihood values ( $\frac{\bar{x}_i}{N_i}$ , the proportion of each feature  
604 within a sampling group). Additional performance gains can be achieved by combining  
605 features that are consistently infrequent across replicates to form a composite feature. This  
606 composite feature should be included in modelling, otherwise proportion estimates will be  
607 distorted and incorrect. This approach could be particularly appropriate for analysis of  
608 high-throughput sequencing of microbiomes and transcriptomes, which often rely on data sets  
609 characterized by many features of extremely low relative abundance. Estimates of the relative  
610 abundance of very infrequent features will be imprecise, thus precluding effective comparison  
611 of relative abundances among sampling groups. Therefore, for some questions, combining  
612 these features will not lessen inferential opportunity and can greatly reduce computation  
613 time.

614 Some authors have suggested that the expected negative covariance of feature propor-  
615 tions ( $\vec{p}$ ) in a Dirichlet distribution is a drawback that makes this distribution undesirable  
616 (Grantham et al. 2017, Mandal et al. 2015, Weiss et al. 2016). Specifically, the elements of  
617  $\vec{p}$  in a deviate from a Dirichlet distribution are expected to negatively covary (Mosimann  
618 1962) according to:  $Cov[p_i, p_j] = \frac{-\alpha_i \alpha_j}{\alpha_0^2 (\alpha_0 + 1)}$ , where  $\vec{p}$  is the vector of expected proportions for

619 features in the composition and  $\vec{\alpha}$  represents the Dirichlet parameter vector. Indexing of  $\vec{p}$   
620 and  $\vec{\alpha}$  across features is achieved via  $i$  and  $j$ , and  $\alpha_0 = \sum_{i=1}^n \alpha_i$ , where  $n$  is the number of  
621 features. For even modest values of  $\alpha_0$ , the expected negative covariance between elements  
622 in  $\vec{p}$  is small and diminishes rapidly with increasing  $\alpha_0$ , approaching zero in the limit of large  
623  $\alpha_0$ . The negative covariance structure is a fundamental limitation of compositional data,  
624 as one or more features increase, other features must decline to maintain a constant sum.  
625 Thus, the Dirichlet distribution assumes a reality that mirrors the data.

626 There are many problems associated with the analysis of compositional data that cannot  
627 be handled by DMM alone (see Aitchison and Egozcue 2005, Gloor and Reid 2016, Quinn  
628 et al. 2017, Tsilimigras and Fodor 2016, van den Boogaart and Tolosana-Delgado 2013). The  
629 most intuitive challenge posed by compositional data is that spurious correlations among  
630 features can arise because of the data’s inherent covariance structure (Pearson 1897). For  
631 instance, shifts in the relative abundance of a dominant microbial taxon along an abiotic  
632 gradient causes shifts in the relative abundance of co-occurring taxa, even if the actual  
633 abundances of those taxa are invariant across the gradient (Fig. 1). In such a scenario, com-  
634 positionality could induce associations between the relative abundances of certain taxa and  
635 the gradient that are not biologically supported. Other issues that can arise when analyzing  
636 compositional data include “sub-compositional incoherence”, which means that omission of  
637 features from the composition necessarily changes the relative abundances of the remain-  
638 ing features after they are renormalized to their constant sum (e.g., one for proportions;  
639 Pawlowsky-Glahn and Egozcue 2006).

640 The technique most relied upon to address these problems is log ratio transformation:  
641  $\log\left(\frac{p_i}{g(\vec{p})}\right)$ , where  $p_i$  is the  $i^{\text{th}}$  feature within  $\vec{p}$ , which is composed of either counts or propor-  
642 tions, and  $g(\vec{p})$  is a function. When  $g(\vec{p})$  is the geometric mean of all feature abundances,  
643 this transformation is called the “centered log ratio” (CLR; Aitchison 1982). Division by  
644 the geometric mean places all replicates on the same scale and, therefore, is useful when  
645 variation in sampling effort exists among replicates. Alternatively,  $g(\vec{p})$  can be an indexing

646 function and output the value of a feature,  $p_j$ , that has a constant absolute abundance among  
647 replicates. This approach is called the “additive log ratio” (ALR) transformation (Aitchison  
648 1982) and can be useful when an internal standard can be added to samples prior to data  
649 generation (e.g. during library preparation for next-generation sequencing; Jiang et al. 2011,  
650 Munro et al. 2014, Turlousse et al. 2017, Tkacz et al. 2018) or when certain features are  
651 expected to be invariant among replicates (e.g. “housekeeping genes”; Eisenberg and Lev-  
652 anon 2013). By converting information from each feature into a ratio, both ALR and CLR  
653 avoid the sub-composition incoherence problem (Morton et al. 2019). To understand this,  
654 consider conducting the ALR transformation on replicates that each include a feature with  
655 identical absolute abundance that is used as the denominator in the transformation (it does  
656 not matter whether we consider counts or proportions for this example). The ratio between  
657 any specific feature within a replicate and the denominator will not be affected by removing  
658 other features from the composition (i.e., if the ratio is 2:1 it will remain so after omitting  
659 features from the composition and re-normalizing to maintain a constant sum). Either the  
660 CLR or ALR transformation can be applied to each MCMC sample of parameters of interest  
661 to obtain transformed PPDs for analysis (see Fernandes et al. 2014, for an example).

## 662 **Conclusions**

663 The challenges posed by many modern molecular ecology data sets—extreme dimensionality,  
664 compositionality, and, often, stark differences in the abundance of features—have motivated  
665 the rapid development of new analytical tools and techniques. Indeed, new methods and  
666 software are published on a near monthly basis and practitioners are left to wonder which tool  
667 is best suited for the job at hand. While we do not claim DMM addresses all the challenges  
668 associated with compositional data, we do report that it is a sensitive, flexible technique  
669 that facilitates feature-specific analyses and should be added to ecologist’s toolkits (Fordyce  
670 et al. 2011). It is likely to be broadly useful and sensitive for analyses of microbiomes,  
671 other DNA barcoding, gene expression, metabolomics, and other applications in molecular

672 ecology (Table S1). To facilitate use of DMM, we have provided an expository vignette in  
673 the Electronic Supplemental Material that provides an example of how to perform DMM  
674 using both **Stan** and **JAGS** in the R environment.

675 The success of DMM for relative abundance estimation, as demonstrated herein, coupled  
676 with the aforementioned benefits of hierarchical Bayesian modelling, justifies extension of  
677 the DMM to determine the effects of covariates on relative abundances and to characterize  
678 mixtures of compositions (sensu Chen and Li 2013, Holmes et al. 2012, Knights et al. 2011,  
679 Shafiei et al. 2015, Tang and Chen 2018). We look forward to continued method development  
680 along these lines.

## 681 **Acknowledgments**

682 We wish to thank Claire Duvallet and the co-authors of Duvallet et al. (2019) for making  
683 their well-curated data available to the public. Specific thanks to Dr. Duvallet for helpful  
684 interpretation regarding our reanalysis of her and her co-author's data. Additional thanks  
685 to helpful comments from James Fordyce and two anonymous reviewers. This research  
686 was supported by the Microbial Ecology Collaborative at the University of Wyoming with  
687 funding from NSF award #EPS-1655726. Computing was performed in the Teton Computing  
688 Environment at the Advanced Research Computing Center, University of Wyoming, Laramie  
689 (<https://doi.org/10.15786/M2FY47>).

## 690 **Data Accessibility**

691 All scripts and processed data used for this manuscript are available at [https://github.com/JHarrisonEcoEvo/DMMHarrison et al. 2019](https://github.com/JHarrisonEcoEvo/DMMHarrison%20et%20al.%202019) and a snapshot corresponding to the status  
692 at publication at Zenodo (10.5281/zenodo.3558682). Data from Duvallet et al. (2019) can  
693 be downloaded from (DOI: 10.5281/zenodo.2678108).

695 Author contributions: All authors contributed to model development and manuscript prepa-  
696 ration.

## References

- Aitchison, J. (1982). *The statistical analysis of compositional data*. Chapman and Hall, New York, NY. CITE.
- Aitchison, J. and Egozcue, J. J. (2005). Compositional data analysis: where are we and where should we be heading? *Mathematical Geology*, 37(7):829–850.
- Akata, K., Yatera, K., Yamasaki, K., Kawanami, T., Naito, K., Noguchi, S., Fukuda, K., Ishimoto, H., Taniguchi, H., and Mukae, H. (2016). The significance of oral streptococci in patients with pneumonia with risk factors for aspiration: the bacterial floral analysis of 16s ribosomal RNA gene using bronchoalveolar lavage fluid. *BMC Pulmonary Medicine*, 16(1):79.
- Bates, D., Mächler, M., Bolker, B., and Walker, S. (2015). Fitting linear mixed-effects models using lme4. *Journal of Statistical Software*, 67(1):1:48.
- Beck, J. M., Young, V. B., and Huffnagle, G. B. (2012). The microbiome of the lung. *Translational Research*, 160(4):258–266.
- Björk, J. R., Hui, F. K. C., O’Hara, R. B., and Montoya, J. M. (2018). Uncovering the drivers of host-associated microbiota with joint species distribution modelling. *Molecular Ecology*, 27(12):2714–2724.
- Blei, D. M., Kucukelbir, A., and McAuliffe, J. D. (2017). Variational inference: a review for statisticians. *Journal of the American Statistical Association*, 112(518):859–877.
- Buckland, M. and Gey, F. (1994). The relationship between Recall and Precision. *Journal of the American Society for Information Science*, 45(1):12–19.
- Bullard, J. H., Purdom, E., Hansen, K. D., and Dudoit, S. (2010). Evaluation of statistical methods for normalization and differential expression in mRNA-Seq experiments. *BMC Bioinformatics*, 11(1):94.
- Carbonetto, P. and Stephens, M. (2012). Scalable variational inference for Bayesian variable selection in regression, and its accuracy in genetic association studies. *Bayesian Analysis*, 7(1):73–108.
- Carpenter, B., Gelman, A., Hoffman, M. D., Lee, D., Goodrich, B., Betancourt, M., Brubaker, M., Guo, J., Li, P., and Riddell, A. (2017). Stan: a probabilistic programming language. *Journal of Statistical Software*, 76(1):1–32.



- Chen, J. and Li, H. (2013). Variable selection for sparse Dirichlet-multinomial regression with an application to microbiome data analysis. *The Annals of Applied Statistics*, 7(1):418–442.
- Claesson, B. A. and Leinonen, M. (1994). *Moraxella catarrhalis* — an uncommon cause of community-acquired pneumonia in Swedish children. *Scandinavian Journal of Infectious Diseases*, 26(4):399–402.
- Coblentz, K. E., Rosenblatt, A. E., and Novak, M. (2017). The application of Bayesian hierarchical models to quantify individual diet specialization. *Ecology*, 98(6):1535–1547.
- Dillies, M.-A., Rau, A., Aubert, J., Hennequet-Antier, C., Jeanmougin, M., Servant, N., Keime, C., Marot, G., Castel, D., Estelle, J., Guernec, G., Jagla, B., Jouneau, L., Laloë, D., Le Gall, C., Schaëffer, B., Le Crom, S., Guedj, M., and Jaffrézic, F. (2013). A comprehensive evaluation of normalization methods for Illumina high-throughput RNA sequencing data analysis. *Briefings in Bioinformatics*, 14(6):671–683.
- Duvallet, C., Larson, K., Snapper, S., Iosim, S., Lee, A., Freer, K., May, K., Alm, E., and Rosen, R. (2019). Aerodigestive sampling reveals altered microbial exchange between lung, oropharyngeal, and gastric microbiomes in children with impaired swallow function. *PLOS ONE*, 14(5):e0216453.
- Eisenberg, E. and Levanon, E. Y. (2013). Human housekeeping genes, revisited. *Trends in Genetics*, 29(10):569–574.
- El-Solh, A. A., Pietrantonio, C., Bhat, A., Aquilina, A. T., Okada, M., Grover, V., and Gifford, N. (2003). Microbiology of severe aspiration pneumonia in institutionalized elderly. *American Journal of Respiratory and Critical Care Medicine*, 167(12):1650–1654.
- Fernandes, A. D., Reid, J. N., Macklaim, J. M., McMurrough, T. A., Edgell, D. R., and Gloor, G. B. (2014). Unifying the analysis of high-throughput sequencing datasets: characterizing RNA-seq, 16s rRNA gene sequencing and selective growth experiments by compositional data analysis. *Microbiome*, 2:15.
- Fordyce, J. A., Gompert, Z., Forister, M. L., and Nice, C. C. (2011). A hierarchical Bayesian approach to ecological count data: a flexible tool for ecologists. *PLOS ONE*, 6(11):e26785.
- Friedman, J. and Alm, E. J. (2012). Inferring correlation networks from genomic survey data. *PLOS Computational Biology*, 8(9):e1002687. software.
- Gelman, A., Carlin, J. B., Stern, H. S., Dunson, D. B., Vehtari, A., Rubin, D. B., Carlin, J. B., Stern, H. S., Dunson, D. B., Vehtari, A., and Rubin, D. B. (2013). *Bayesian data analysis*. Chapman and Hall/CRC.
- Gelman, A. and Rubin, D. B. (1992). Inference from iterative simulation using multiple sequences. *Statistical Science*, 7(4):457–472.

- Geman, S. and Geman, D. (1987). Stochastic relaxation, Gibbs distributions, and the Bayesian restoration of images. In Fischler, M. A. and Firschein, O., editors, *Readings in Computer Vision*, pages 564–584. Morgan Kaufmann, San Francisco (CA).
- Geweke, J. (1991). *Evaluating the accuracy of sampling-based approaches to the calculation of posterior moments*. Federal Reserve Bank of Minneapolis, Research Department, Minneapolis, MN, USA.
- Gloor, G. B., Macklaim, J. M., Pawlowsky-Glahn, V., and Egozcue, J. J. (2017). Microbiome datasets are compositional: and this is not optional. *Frontiers in Microbiology*, 8. review.
- Gloor, G. B. and Reid, G. (2016). Compositional analysis: a valid approach to analyze microbiome high-throughput sequencing data. *Canadian Journal of Microbiology*, 62(8):692–703.
- Grantham, N. S., Reich, B. J., Borer, E. T., and Gross, K. (2017). MIMIX: a Bayesian mixed-effects model for microbiome data from designed experiments. *arXiv:1703.07747 [stat]*. arXiv: 1703.07747.
- Harrison, J. G., Calder, W. J., Shastry, V., and Buerkle, C. A. (2019). Scripts from "Dirichlet-multinomial modelling outperforms alternatives for analysis of microbiome and other ecological count data". DOI: 10.5281/zenodo.3558682. *Zenodo*.
- Hoffman, M. D. and Gelman, A. (2014). The no-U-turn sampler: adaptively setting path lengths in Hamiltonian Monte Carlo. *Journal of Machine Learning Research*, 15:1593–1623.
- Holas, M. A., DePippo, K. L., and Reding, M. J. (1994). Aspiration and relative risk of medical complications following stroke. *Archives of Neurology*, 51(10):1051–1053.
- Holmes, I., Harris, K., and Quince, C. (2012). Dirichlet multinomial mixtures: generative models for microbial metagenomics. *PLOS ONE*, 7(2):e30126. software.
- Jiang, L., Schlesinger, F., Davis, C. A., Zhang, Y., Li, R., Salit, M., Gingeras, T. R., and Oliver, B. (2011). Synthetic spike-in standards for RNA-seq experiments. *Genome Research*.
- Johnson, M. A., Drew, W. L., and Roberts, M. (1981). *Branhamella (Neisseria) catarrhalis*—a lower respiratory tract pathogen? *Journal of Clinical Microbiology*, 13(6):1066–1069.
- Jojic, V., Jojic, N., Meek, C., Geiger, D., Siepel, A., Haussler, D., and Heckerman, D. (2004). Efficient approximations for learning phylogenetic HMM models from data. *Bioinformatics*, 20(suppl\_1):i161–i168.
- Knight, R., Vrbanac, A., Taylor, B. C., Aksenov, A., Callewaert, C., Debelius, J., Gonzalez, A., Kosciolek, T., McCall, L.-I., McDonald, D., Melnik, A. V., Morton, J. T., Navas, J., Quinn, R. A., Sanders, J. G., Swafford, A. D., Thompson, L. R., Tripathi, A., Xu, Z. Z., Zaneveld, J. R., Zhu, Q., Caporaso, J. G., and Dorrestein, P. C. (2018). Best practices for analysing microbiomes. *Nature Reviews Microbiology*, 16(7):410–422.

- Knights, D., Kuczynski, J., Charlson, E. S., Zaneveld, J., Mozer, M. C., Collman, R. G., Bushman, F. D., Knight, R., and Kelley, S. T. (2011). Bayesian community-wide culture-independent microbial source tracking. *Nature Methods*, 8(9):761. software.
- Krishnamoorthy, K. (2006). *Handbook of statistical distributions with applications*. Chapman and Hall/CRC, Boca Raton, FL, USA.
- Kruschke, J. (2015). *Doing Bayesian data analysis: A tutorial with R, JAGS, and Stan. 2nd Edition*. Academic Press, Elsevier, London, UK, 2 edition.
- Kucukelbir, A., Ranganath, R., Gelman, A., and Blei, D. (2015). Automatic variational inference in Stan. In Cortes, C., Lawrence, N. D., Lee, D. D., Sugiyama, M., and Garnett, R., editors, *Advances in Neural Information Processing Systems 28*, pages 568–576. Curran Associates, Inc.
- Logsdon, B. A., Hoffman, G. E., and Mezey, J. G. (2010). A variational Bayes algorithm for fast and accurate multiple locus genome-wide association analysis. *BMC Bioinformatics*, 11(1):58.
- Love, M. I., Huber, W., and Anders, S. (2014). Moderated estimation of fold change and dispersion for RNA-seq data with DESeq2. *Genome Biology*, 15:550.
- Lunn, D., Jackson, C., Best, N., Thomas, A., Spiegelhalter, D., Jackson, C., Best, N., Thomas, A., and Spiegelhalter, D. (2012). *The BUGS book : a practical introduction to Bayesian analysis*. Chapman and Hall/CRC.
- Lynch, M. D. J. and Neufeld, J. D. (2015). Ecology and exploration of the rare biosphere. *Nature Reviews Microbiology*, 13(4):217–229.
- Mandal, S., Treuren, W. V., White, R. A., Eggesbø, M., Knight, R., and Peddada, S. D. (2015). Analysis of composition of microbiomes: a novel method for studying microbial composition. *Microbial Ecology in Health and Disease*, 26(1):27663.
- Marik, P. E. (2001). Aspiration pneumonitis and aspiration pneumonia. *New England Journal of Medicine*, 344(9):665–671.
- Marion, Z. H., Fordyce, J. A., and Fitzpatrick, B. M. (2018). A hierarchical Bayesian model to incorporate uncertainty into methods for diversity partitioning. *Ecology*, 99(4):947–956.
- Matthews, B. W. (1975). Comparison of the predicted and observed secondary structure of T4 phage lysozyme. *Biochimica et Biophysica Acta (BBA) - Protein Structure*, 405(2):442–451.
- McKnight, D. T., Huerlimann, R., Bower, D. S., Schwarzkopf, L., Alford, R. A., and Zenger, K. R. (2019). Methods for normalizing microbiome data: An ecological perspective. *Methods in Ecology and Evolution*, 10(3):389–400.
- McMurdie, P. J. and Holmes, S. (2014). Waste not, want not: why rarefying microbiome data is inadmissible. *PLOS Comput Biol*, 10(4):e1003531.

- Monnahan, C. C., Thorson, J. T., and Branch, T. A. (2017). Faster estimation of Bayesian models in ecology using Hamiltonian Monte Carlo. *Methods in Ecology and Evolution*, 8(3):339–348.
- Morton, J. T., Marotz, C., Washburne, A., Silverman, J., Zaramela, L. S., Edlund, A., Zengler, K., and Knight, R. (2019). Establishing microbial composition measurement standards with reference frames. *Nature Communications*, 10(1):2719.
- Mosimann, J. E. (1962). On the compound multinomial distribution, the multivariate beta distribution, and correlations among proportions. *Biometrika*, 49(1/2):65–82.
- Munro, S. A., Lund, S. P., Pine, P. S., Binder, H., Clevert, D.-A., Conesa, A., Dopazo, J., Fasold, M., Hochreiter, S., Hong, H., Jafari, N., Kreil, D. P., Łabaj, P. P., Li, S., Liao, Y., Lin, S. M., Meehan, J., Mason, C. E., Santoyo-Lopez, J., Setterquist, R. A., Shi, L., Shi, W., Smyth, G. K., Stralis-Pavese, N., Su, Z., Tong, W., Wang, C., Wang, J., Xu, J., Ye, Z., Yang, Y., Yu, Y., and Salit, M. (2014). Assessing technical performance in differential gene expression experiments with external spike-in RNA control ratio mixtures. *Nature Communications*, 5:5125.
- Niku, J., Brooks, W., Herliansyah, R., Hui, F. K. C., Taskinen, S., and Warton, D. I. (2019). Efficient estimation of generalized linear latent variable models. *PLOS ONE*, 14(5):e0216129.
- Norman M. Jacobs and Harris, V. J. (1979). Acute *Haemophilus pneumonia* in childhood. *American Journal of Diseases of Children*, 133(6):603–605.
- Nowicka, M. and Robinson, M. D. (2016). DRIMSeq: a Dirichlet-multinomial framework for multivariate count outcomes in genomics. *F1000Research*, 5.
- Paulson, J. N., Stine, O. C., Bravo, H. C., and Pop, M. (2013). Differential abundance analysis for microbial marker-gene surveys. *Nature Methods*, 10(12):1200–1202.
- Pawlowsky-Glahn, V. and Egozcue, J. J. (2006). Compositional data and their analysis: an introduction. *Geological Society, London, Special Publications*, 264(1):1–10.
- Pearson, K. (1897). Mathematical contributions to the theory of evolution—on a form of spurious correlation which may arise when indices are used in the measurement of organs. *Proceedings of the Royal Society of London*, 60(359-367):489–498. classic.
- Plummer, M. (2003). JAGS: A program for analysis of Bayesian graphical models using Gibbs sampling.
- Plummer, M. (2015). rjags: bayesian graphical models using MCMC. R package version 3-15. <https://CRAN.R-project.org/package=rjags>.
- Quinn, T. P., Erb, I., Richardson, M. F., and Crowley, T. M. (2017). Understanding sequencing data as compositions: an outlook and review. *bioRxiv*, page 206425.

- R Core Team (2019). *R: A Language and Environment for Statistical Computing*. R Foundation for Statistical Computing, Vienna, Austria.
- Raj, A., Stephens, M., and Pritchard, J. K. (2014). fastSTRUCTURE: variational inference of population structure in large SNP data sets. *Genetics*, 197(2):573–589.
- Robinson, M. D., McCarthy, D. J., and Smyth, G. K. (2010). edgeR: a Bioconductor package for differential expression analysis of digital gene expression data. *Bioinformatics*, 26(1):139–140.
- Rosa, P. S. L., Brooks, J. P., Deych, E., Boone, E. L., Edwards, D. J., Wang, Q., Sodergren, E., Weinstock, G., and Shannon, W. D. (2012). Hypothesis testing and power calculations for taxonomic-based human microbiome data. *PLOS ONE*, 7(12):e52078.
- Sachdeva, R., Campbell, B. J., and Heidelberg, J. F. (2019). Rare microbes from diverse Earth biomes dominate community activity. *bioRxiv*, page 636373.
- Salvatier, J., Wiecki, T. V., and Fonnesbeck, C. (2016). Probabilistic programming in Python using PyMC3. *PeerJ Computer Science*, 2:e55.
- Scordato, E. S. C., Wilkins, M. R., Semenov, G., Rubtsov, A. S., Kane, N. C., and Safran, R. J. (2017). Genomic variation across two barn swallow hybrid zones reveals traits associated with divergence in sympatry and allopatry. *Molecular Ecology*, 26(20):5676–5691.
- Shafiei, M., Dunn, K. A., Boon, E., MacDonald, S. M., Walsh, D. A., Gu, H., and Bielawski, J. P. (2015). BioMiCo: a supervised Bayesian model for inference of microbial community structure. *Microbiome*, 3:8. software.
- Shenhav, L., Thompson, M., Joseph, T. A., Briscoe, L., Furman, O., Bogumil, D., Mizrahi, I., Pe’er, I., and Halperin, E. (2019). FEAST: fast expectation-maximization for microbial source tracking. *Nature Methods*, page 1.
- Stan Development Team (2018). *RStan: the R interface to Stan*. R package version 2.17.3.
- Tang, Z.-Z. and Chen, G. (2018). Zero-inflated generalized Dirichlet multinomial regression model for microbiome compositional data analysis. *Biostatistics*, 00(00):1–16.
- Thomson, J., Hall, M., Ambroggio, L., Stone, B., Srivastava, R., Shah, S. S., and Berry, J. G. (2016). Aspiration and non-aspiration pneumonia in hospitalized children with neurologic impairment. *Pediatrics*, 137(2):e20151612.
- Thorsen, J., Brejnrod, A., Mortensen, M., Rasmussen, M. A., Stokholm, J., Al-Soud, W. A., Sørensen, S., Bisgaard, H., and Waage, J. (2016). Large-scale benchmarking reveals false discoveries and count transformation sensitivity in 16s rRNA gene amplicon data analysis methods used in microbiome studies. *Microbiome*, 4(1):62.
- Tkacz, A., Hortala, M., and Poole, P. S. (2018). Absolute quantitation of microbiota abundance in environmental samples. *Microbiome*, 6(1):110.

- Tourlousse, D. M., Yoshiike, S., Ohashi, A., Matsukura, S., Noda, N., and Sekiguchi, Y. (2017). Synthetic spike-in standards for high-throughput 16s rRNA gene amplicon sequencing. *Nucleic Acids Research*, 45(4):e23–e23.
- Tsilimigras, M. C. B. and Fodor, A. A. (2016). Compositional data analysis of the microbiome: fundamentals, tools, and challenges. *Annals of Epidemiology*, 26(5):330–335. review, very good.
- van den Boogaart, K. G. and Tolosana-Delgado, R. (2013). *Analyzing Compositional Data with R*. Springer Publishing Company, Incorporated.
- Wang, Y., Naumann, U., Eddelbuettel, D., Wilshire, J., Warton, D., Byrnes, J., Silva, R. d. S., Niku, J., Renner, I., and Wright, S. (2019). mvabund: statistical methods for analysing multivariate abundance data.
- Weiss, S., Van Treuren, W., Lozupone, C., Faust, K., Friedman, J., Deng, Y., Xia, L. C., Xu, Z. Z., Ursell, L., Alm, E. J., Birmingham, A., Cram, J. A., Fuhrman, J. A., Raes, J., Sun, F., Zhou, J., and Knight, R. (2016). Correlation detection strategies in microbial data sets vary widely in sensitivity and precision. *The ISME journal*, 10(7):1669–1681.
- Weiss, S., Xu, Z. Z., Peddada, S., Amir, A., Bittinger, K., Gonzalez, A., Lozupone, C., Zaneveld, J. R., Vázquez-Baeza, Y., Birmingham, A., Hyde, E. R., and Knight, R. (2017). Normalization and microbial differential abundance strategies depend upon data characteristics. *Microbiome*, 5:27.
- White, A. E., Dey, K. K., Mohan, D., Stephens, M., and Price, T. D. (2019). Regional influences on community structure across the tropical-temperate divide. *Nature Communications*, 10(1):2646.
- Yang, Y., Chen, N., and Chen, T. (2017). Inference of environmental factor-microbe and microbe-microbe associations from metagenomic data using a hierarchical Bayesian statistical model. *Cell Systems*, 4(1):129–137.e5.

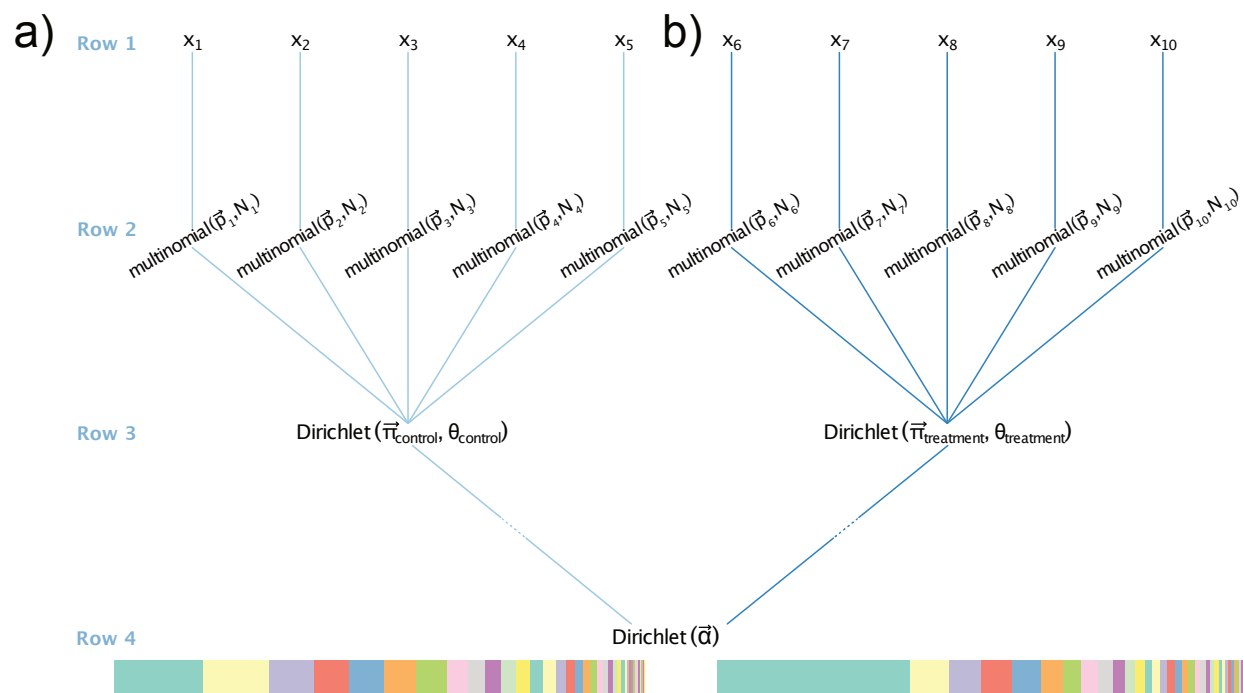

Figure 1: Visual depiction of hierarchical Bayesian modelling of the relative abundance of features within compositional data. Panels (a) and (b) represent two different sampling groups—a treatment group and a control group. The colored bars at the bottom of the plot show two hypothetical compositions that differ between those sampling groups. These compositions differ by virtue of the first feature, shown in pastel green, shifting dramatically in relative abundance, thus all other features are shifted in relative abundance as well (because these are proportion data and must sum to one). This interdependency represents an opportunity for statistical modelling because parameters that describe relative abundance are mutually informative. However, interdependency also poses many challenges (see main text). Replicates within sampling groups are denoted as  $x_i$ , where  $i$  is an integer in the range  $[1,10]$  (row 1). Replicates consist of data that are multinomially distributed (see Box 1). Therefore, each replicate is modeled using a unique multinomial distribution with parameters  $\vec{p}_i$  and  $N_i$  (row 2), where the vector  $\vec{p}$  describes the probabilities that an observation would be assigned to a particular feature and the  $N$  parameters denote the total number of observations per replicate. Multinomial parameters are modeled as a deviate from a Dirichlet distribution unique to the treatment group (row 3). The  $\vec{\pi}$  parameters of the Dirichlet are estimates of proportional abundance for all features within the group. The  $\theta$  parameter is a scalar intensity parameter that describes the amount of among-replicate variation present within each sampling group. The prior imposed on the Dirichlet distributions of both sampling groups has the expectation  $\frac{1}{n}$  for each feature, where  $n$  is the number of features. If desired, additional Dirichlet distributions could be added between rows three and four to share information as dictated by more complexly nested experimental designs.

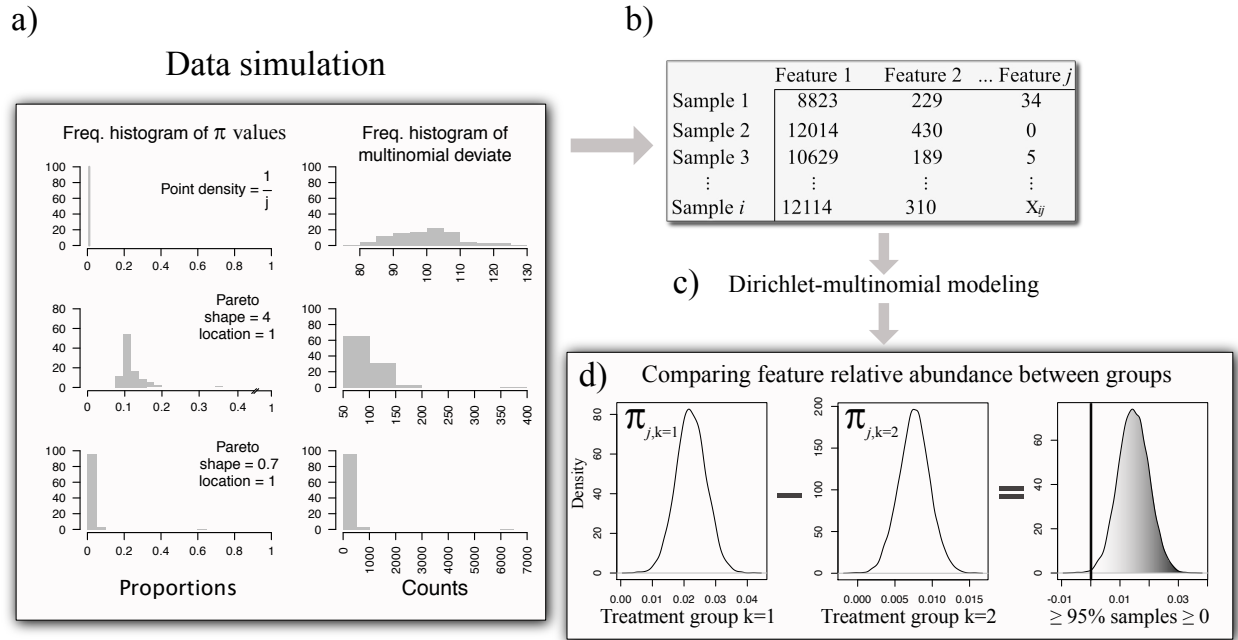

Figure 2: Visual description of simulation approach. (a) Deviates from either of two Pareto distributions, or a point density, defined as one divided by the number of features ( $j$ ), were used to simulate values used to parameterize Dirichlet distributions. The use of these three approaches generated deviates with parameters that differed dramatically in rank abundance profiles, as shown in the left portion of panel (a). These deviates were, in turn, used to parameterize a Dirichlet distribution (with intensity parameter  $\theta$ ). A deviate of this Dirichlet distribution served as the parameter vector of a multinomial distribution that was sampled (b) to generate a feature ( $j$ ) by replicate ( $i$ ) matrix that emulated an OTU or transcript table (see the right portion of panel a for an example frequency distribution of multinomial deviates). This matrix encompassed samples belonging to two sampling groups. Dirichlet parameters for each group were made to differ such that certain features varied in relative abundance between groups by a known effect size. (c) Hierarchical Bayesian modelling (Fig. 1) was used to estimate the Dirichlet parameters ( $\pi_{j,k}$ ) describing the relative abundance of each feature ( $j$ ) in each sampling group ( $k$ ). (d) To determine if a feature ( $\pi_j$ ) differed in relative abundance between treatment groups ( $k$ ), the posterior probability distribution (PPD) for the feature of interest from one treatment group,  $\pi_{j,k=1}$ , was subtracted from the PPD for that feature from the second treatment group,  $\pi_{j,k=2}$ . If the resulting PPD of differences indicated zero difference was improbable, then there was high certainty that  $\pi_j$  differed between treatment groups. Additionally, the location of zero within the PPD quantified the certainty of a non-zero effect of treatment.



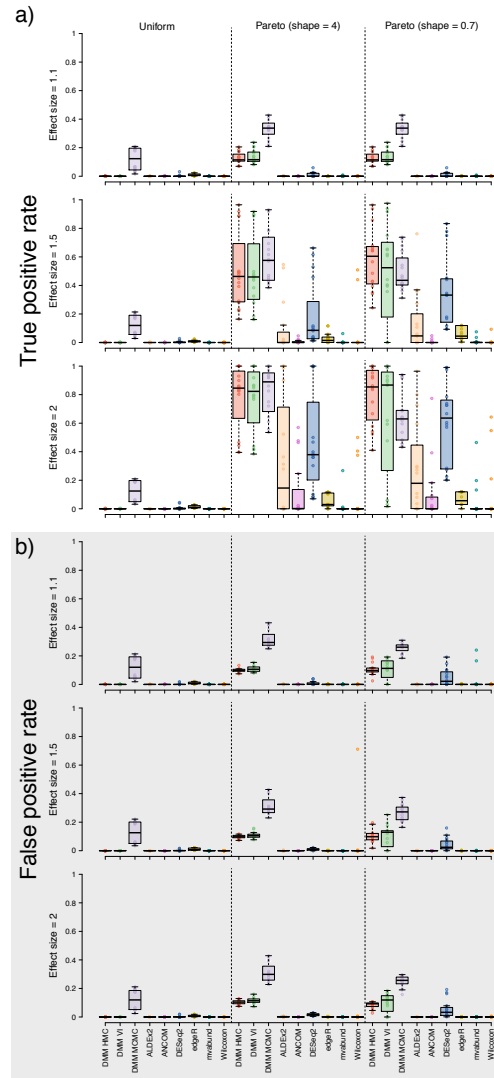

Figure 3: Performance of Dirichlet-multinomial modelling (DMM) and competing methods when confronted with simulated data from a treatment-control experimental design. Each point denotes the results from analysis of a simulated dataset. Panel a depicts true positive rate and panel b depicts false positive rate. The x axis describes the methods competed, which are each given a unique color. Each panel is split into three sections that correspond with the three rank abundance profiles used to simulate data (see Fig. 2). “Uniform” refers to data where the expected relative abundance of all features was equivalent; “pareto (shape = 4)” refers to data with an intermediate rank abundance skew; “pareto (shape = 0.7)” were highly skewed data with very few abundant features and many rare features. Features were made to shift in relative abundance between treatment groups by different effect sizes (an effect size of 1.1 corresponded with a 10% shift in relative abundance). Panels are split by row to show results for a specified effect size. Rectangles in the boxplots delineate the central 50% of the data (1st to 3rd quartiles, also called the interquartile range) and contain the median (delineated by a horizontal line). Whiskers extend an additional 1.5 times the interquartile range beyond the first and third quartiles. These are the defaults for boxplots in base R.

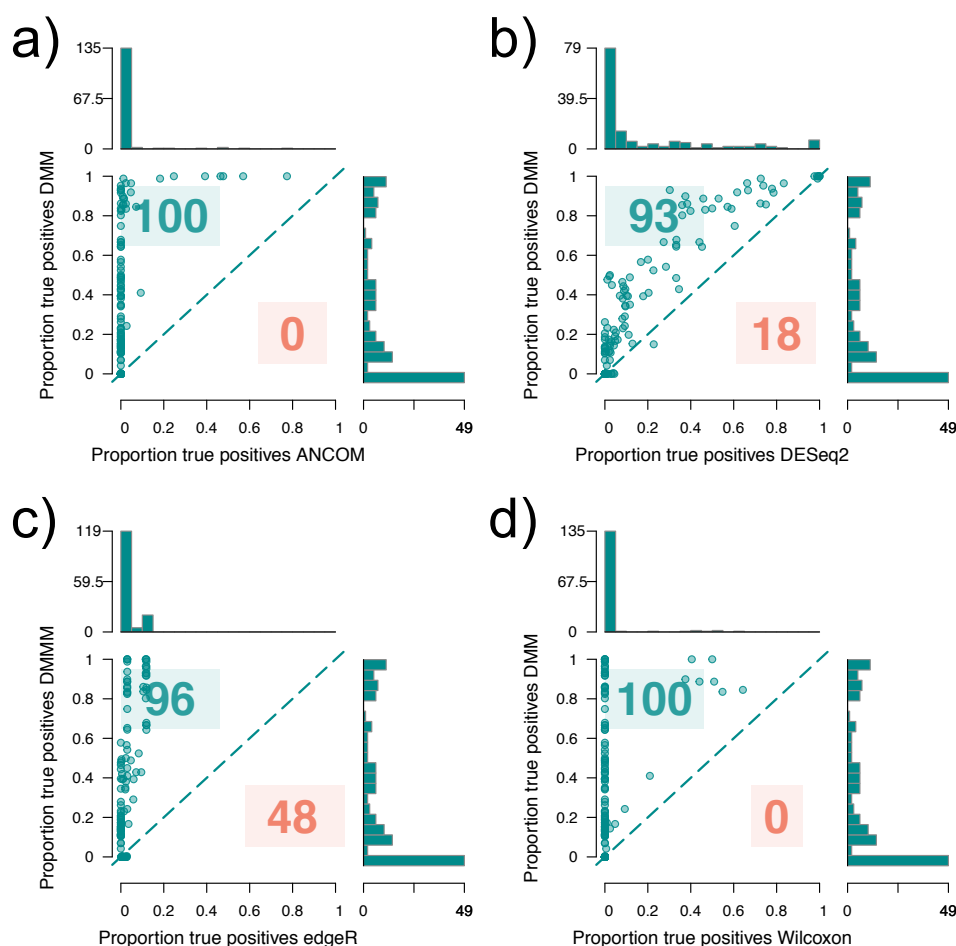

Figure 4: Relative ability of competing methods to detect true positives within simulated data. Each point represents the results from a simulated data set and each panel compares the proportion of true positives identified by Bayesian Dirichlet-multinomial modelling (using HMC) to the proportion of true positives identified by a competing method: (a) ANCOM, (b) DESeq2, (c) edgeR, (d) Wilcoxon rank sum test. The line bisecting each plot denotes equal performance of both models—so if a point lies above this line then HMC detected more true positives than the competing method for that data set. The summed numbers of points on either side of this line are shown to demonstrate relative performance of methods across datasets. For instance, in panel (a), the Dirichlet-multinomial model (DMM) detected more true positives than ANCOM for 100 data sets, while ANCOM was the more sensitive model for zero data sets. The sum numbers of simulations for each panel differ (and do not always reflect the 144 total data sets analyzed) because in some cases both DMM and the competing method exhibited equal performance. This was mostly the case for extremely challenging data when neither method was able to detect any true positives. Marginal histograms in each plot denote frequency distributions of results along the parallel axis.

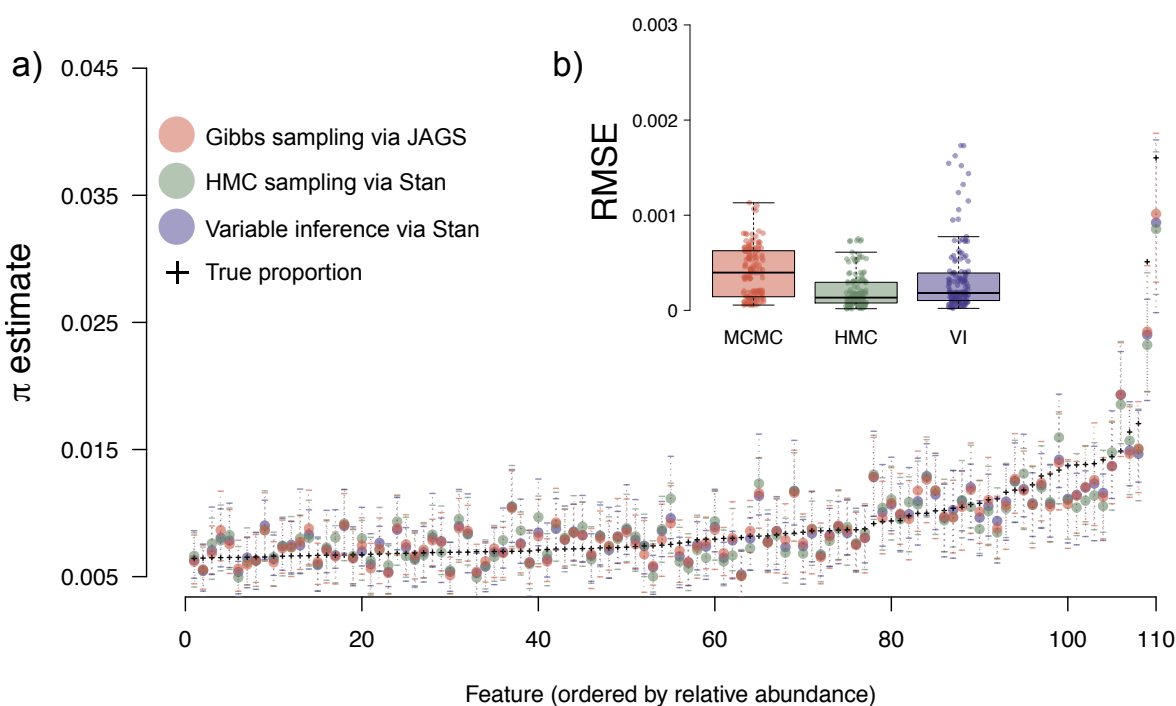

Figure 5: Comparison of DMM performance when using different methods to estimate posterior probability distributions (PPDs) of parameters describing feature relative abundance within sampling groups ( $\vec{\pi}$ ; see Fig. 1). The results shown in panel (a) are from a single, illustrative simulation. Features are indexed along the horizontal axis and associated  $\vec{\pi}$  estimates are shown on the vertical axis. The means of PPDs are shown as shaded circles and the 95% high density interval (HDI) of the PPD is delineated by dotted lines. The true proportions (+ symbols) fall within the HDI of the PPD for almost all features, regardless of PPD estimation method. Average root mean square error (RMSE) for  $\pi$  parameters for all simulated data sets for each method is shown in panel (b).

## Supplementary Material

### *Supplemental Methods*

#### *Determination of feature abundance class*

Deviates used to simulate data were divided into abundance classes to ensure that features of each abundance class were made to differ between sampling groups. All features were assigned to the intermediate abundance class when Dirichlet  $\vec{\pi}$  parameters were assigned a constant value. When the Pareto distribution with shape parameter of four was used, deviates greater than or equal to five were assigned to the abundant class, deviates in the intermediate class were between two and five, and deviates within the rare class were less than two. When the Pareto distribution with shape parameter of 0.7 was used, deviates

greater than 1000 were assigned to the abundant class, deviates between 1000 and 100 to the intermediate class, and deviates less than 100 to the rare class. These thresholds were chosen through visual examination of frequency distributions of deviates from distributions. Recall that the location parameter (minimum value) of the Pareto distributions was set to one.

### *Implementation of competing software*

For analyses conducted using ALDEx2 v1.14.1 (Fernandes et al. 2014) we drew 1000 MCMC samples, which were transformed using the CLR (denom = all). Welch's t tests and general linear models were used to determine differential relative abundance. We used a  $p$  value threshold of 0.05 to determine significance after applying a Benjamini-Hochberg FDR correction.

Options used for ANCOM v2.0 (Mandal et al. 2015) included a significance value of 0.05, a "less stringent" multiple comparison correction (multcorr = 2), "prev.cut" was set to 0.99 (meaning features that were not observed in 99% or more of samples were omitted), and "repeated" was set to "False". During analysis we uncovered an apparent error in the ANCOM v1.1-3 software. On occasion, ANCOM would suggest that all features within a data set differed significantly between groups. This error was not stable, though errors did seem to only occur when data were generated using the Pareto distribution. Upon further research, we found others have reported this error on the QIIME forums (Caporaso et al. 2010). To work around this problem, during the very rare cases when ANCOM reported  $\geq 90\%$  of features were significant, we identified significantly differing features as those with non-zero  $w$  parameters (the test statistic used by ANCOM). This resulted in very similar results among replicate analyses of data simulated using the same parameters, but that did not trigger the aforementioned error. Subsequently, we shifted analyses to rely on ANCOM v2.0, but we left this solution in place in the event that v2.0 suffered from the same error we observed in v1.1-3.

We used default options for DESeq2 v1.18.1 (Love et al. 2014). The "nbinomWaldTest" function was used to determine differential relative abundance. Significant differences were defined at  $p \leq 0.05$  after a multiple comparison correction that was calculated by DESeq2.

Default options were used for edgeR v3.20.9 (Robinson et al. 2010). After dispersion estimates were calculated using the "estimateDisp" function, the "glmQLFit" and "glmQLFTest" functions were used to determine differential relative abundance. Features differing in relative abundance were determined using the "topTags" function with a Benjamini-Hochberg FDR correction and  $p \leq 0.05$  threshold.

Default options were used for mvabund v4.0.1 (Wang et al. 2019). Simulated data were converted into an mvabund object using the "mvabund" function. The "manyglm" function was used to implement a non-hierarchical linear model where each taxon was the response and treatment group was a categorical predictor variable. A negative binomial distribution was used for the GLM and the parameter "cor.type" set to "shrink" to account for correlation among response variables. Results from the GLM were determined using the "anova" function with a Wald test and a multiple comparison correction using a step-down resampling algorithm described in Wang et al. (2012) and Westfall and Young (1993).

R was used to implement all software.

### *Examples of possible derived parameters*

Derived parameters can be calculated from the output of Dirichlet-multinomial modelling while preserving the uncertainty quantified by the model. For example, many microbial and community ecologists wish to compare diversity indices among sampling groups (Jost 2007, Marion et al. 2015). Diversity indices can be calculated for each sample of the Dirichlet's  $\vec{\pi}$  parameter vector, thus generating a PPD of diversity statistics for each sampling group. PPDs of diversity could then be compared between sampling groups through subtraction (see Harrison et al. 2019 for an example). This conceptual approach was first described by Marion et al. (2018), though the model in that study relied upon a multivariate normal prior with softmax transformation, instead of the Dirichlet prior we use here.

## Supplemental References

- Caporaso, J. G., Kuczynski, J., Stombaugh, J., Bittinger, K., Bushman, F. D., Costello, E. K., Fierer, N., Peña, A. G., Goodrich, J. K., Gordon, J. I., Huttley, G. A., Kelley, S. T., Knights, D., Koenig, J. E., Ley, R. E., Lozupone, C. A., McDonald, D., Muegge, B. D., Pirrung, M., Reeder, J., Sevinsky, J. R., Turnbaugh, P. J., Walters, W. A., Widmann, J., Yatsunenkov, T., Zaneveld, J., and Knight, R. (2010). QIIME allows analysis of high-throughput community sequencing data. *Nature Methods*, 7(5):335–336.
- Duvallet, C., Larson, K., Snapper, S., Iosim, S., Lee, A., Freer, K., May, K., Alm, E., and Rosen, R. (2019). Aerodigestive sampling reveals altered microbial exchange between lung, oropharyngeal, and gastric microbiomes in children with impaired swallow function. *PLOS ONE*, 14(5):e0216453.
- Fernandes, A. D., Reid, J. N., Macklaim, J. M., McMurrough, T. A., Edgell, D. R., and Gloor, G. B. (2014). Unifying the analysis of high-throughput sequencing datasets: characterizing RNA-seq, 16s rRNA gene sequencing and selective growth experiments by compositional data analysis. *Microbiome*, 2:15.
- Harrison, J., Beltran, L. P., Buerkle, C. A., Cook, D., Gardner, D., Parchman, T. L., and Forister, M. L. (2019). A suite of rare microbes interacts with a dominant, heritable, fungal endophyte to influence plant trait expression. *bioRxiv*, page 608729.
- Jost, L. (2007). Partitioning diversity into independent alpha and beta components. *Ecology*, 88(10):2427–2439.
- Love, M. I., Huber, W., and Anders, S. (2014). Moderated estimation of fold change and dispersion for RNA-seq data with DESeq2. *Genome Biology*, 15:550.
- Mandal, S., Treuren, W. V., White, R. A., Eggesbø, M., Knight, R., and Peddada, S. D. (2015). Analysis of composition of microbiomes: a novel method for studying microbial composition. *Microbial Ecology in Health and Disease*, 26(1):27663.
- Marion, Z. H., Fordyce, J. A., and Fitzpatrick, B. M. (2015). Extending the concept of diversity partitioning to characterize phenotypic complexity. *The American Naturalist*, 186(3):348–361.

- Marion, Z. H., Fordyce, J. A., and Fitzpatrick, B. M. (2018). A hierarchical Bayesian model to incorporate uncertainty into methods for diversity partitioning. *Ecology*, 99(4):947–956.
- Robinson, M. D., McCarthy, D. J., and Smyth, G. K. (2010). edgeR: a Bioconductor package for differential expression analysis of digital gene expression data. *Bioinformatics*, 26(1):139–140.
- Wang, Y., Naumann, U., Eddelbuettel, D., Wilshire, J., Warton, D., Byrnes, J., Silva, R. d. S., Niku, J., Renner, I., and Wright, S. (2019). mvabund: statistical methods for analysing multivariate abundance data.
- Wang, Y., Naumann, U., Wright, S. T., and Warton, D. I. (2012). mvabund— an R package for model-based analysis of multivariate abundance data. *Methods in Ecology and Evolution*, 3(3):471–474.
- Westfall, P. H. and Young, S. S. (1993). *Resampling-based multiple testing: examples and methods for p-value adjustment*. John Wiley & Sons. Google-Books-ID: nuQXORVGI1QC.

Table S1: Scientific domains that often rely on compositional data with brief examples of such data with associated methods (if applicable). This table is not meant to be exhaustive, but to draw awareness to the ubiquity of compositional data across the sciences. Asterisks denote data often consisting of proportions rather than counts.

| Domain                         | Example data                                                                                                                                                                                    |
|--------------------------------|-------------------------------------------------------------------------------------------------------------------------------------------------------------------------------------------------|
| Molecular biology              | gene expression characterization (RNA sequencing)<br>chromatin immunoprecipitation sequencing (ChIP-Seq)<br>flow cytometry*                                                                     |
| Analytical chemistry           | chemical concentrations as determined through various methods (e.g., mass spectrometry)*<br>elemental composition*                                                                              |
| Microbiology/Microbial ecology | colony/cell counts*<br>amplicon sequencing                                                                                                                                                      |
| Ecology                        | species counts*<br>DNA barcode based community characterization<br>foraging preference assays*<br>allele frequencies*<br>haplotype counts<br>chemical concentrations*<br>elemental composition* |
| Paleolimnology                 | pollen counts*<br>foraminifera counts*                                                                                                                                                          |
| Geology                        | mineral composition*<br>sediment composition*                                                                                                                                                   |
| Psychology                     | behavioral characterization*                                                                                                                                                                    |
| Economics                      | budget composition<br>portfolio composition                                                                                                                                                     |

Table S2: Influence of data attributes on true positive recovery. Results shown are beta coefficients and 95% confidence intervals from a multiple regression analysis. The response variable was the proportion of true positives recovered. The rank abundance profile of the data was a categorical variable, with point mass as the reference condition. The table is split into two panels of results to aid visualization. \*\*\* denotes  $p < 0.01$ , \*\*  $p < 0.05$ , \*  $p < 0.1$ .

| Method       | Intercept               | Pareto (shape = 0.7) | Pareto (shape = 4)   |                      |
|--------------|-------------------------|----------------------|----------------------|----------------------|
| MCMC         | 0.01 (0.11, -0.1)       | 0.35 (0.43, 0.28)*** | 0.46 (0.53, 0.39)*** |                      |
| Wilcoxon     | -0.08 (-0.02, -0.14)*** | 0.03 (0.07, -0.01)   | 0.05 (0.09, 0)**     |                      |
| DESeq2       | -0.2 (-0.07, -0.33)***  | 0.33 (0.43, 0.24)*** | 0.22 (0.31, 0.12)*** |                      |
| edgeR        | 0.02 (0.04, 0)**        | 0.03 (0.05, 0.02)*** | 0.02 (0.03, 0)***    |                      |
| ANCOM        | -0.07 (-0.02, -0.13)*** | 0.03 (0.07, -0.01)*  | 0.04 (0.08, 0)**     |                      |
| DMM HMC      | -0.18 (-0.03, -0.32)**  | 0.52 (0.62, 0.42)*** | 0.47 (0.57, 0.37)*** |                      |
| DMM VB       | -0.19 (-0.04, -0.33)*** | 0.43 (0.53, 0.33)*** | 0.47 (0.57, 0.36)*** |                      |
| Aldex T-test | 0.18 (-0.06, -0.29)***  | 0.14 (0.22, 0.06)*** | 0.14 (0.22, 0.06)*** |                      |
| mvabund      | -0.02 (0.01, -0.05)     | 0.03 (0.05, 0.01)*** | 0.01 (0.03, -0.01)   |                      |
| Method       | Num. of features        | Num. of observations | Num. of replicates   | Noise                |
| MCMC         | 0 (0, 0)                | 0 (0, 0)             | 0 (0, 0)***          | 0.01 (0.03, -0.02)   |
| Wilcoxon     | 0 (0, 0)                | 0 (0, 0)             | 0 (0, 0)***          | 0.01 (0.02, -0.01)   |
| DESeq2       | 0 (0, 0)                | 0 (0, 0)             | 0 (0, 0)***          | 0.07 (0.1, 0.04)***  |
| edgeR        | 0 (0, 0)***             | 0 (0, 0)             | 0 (0, 0)*            | 0 (0.01, 0)**        |
| ANCOM        | 0 (0, 0)                | 0 (0, 0)             | 0 (0, 0)***          | 0.02 (0.03, 0)***    |
| DMM HMC      | 0 (0, 0)                | 0 (0, 0)             | 0 (0.01, 0)***       | 0.04 (0.08, 0.01)*** |
| DMM VB       | 0 (0, 0)**              | 0 (0, 0)             | 0.01 (0.01, 0)***    | 0.04 (0.07, 0.01)*** |
| Aldex T-test | 0 (0, 0)                | 0 (0, 0)             | 0 (0.01, 0)***       | 0.03 (0.06, 0.01)**  |
| mvabund      | 0 (0, 0)                | 0 (0, 0)             | 0 (0, 0)             | 0 (0.01, 0)          |



Table S3: Influence of data attributes on false positive rate. Results shown are beta coefficients and 95% confidence intervals from a multiple regression analysis. The response variable was the average false positive rate among the three replicates for a unique combination of data attributes. The rank abundance profile of the data was a categorical variable, with point mass as the reference condition. The table is split into two panels of results to aid visualization. \*\*\* denotes  $p < 0.01$ , \*\*  $p < 0.05$ , \*  $p < 0.1$ .

| Method       | Intercept            | Pareto (shape = 0.7)    | Pareto (shape = 4)      |                         |
|--------------|----------------------|-------------------------|-------------------------|-------------------------|
| MCMC         | 0.09 (0.11, 0.07)*** | 0.14 (0.15, 0.12)***    | 0.19 (0.21, 0.18)***    |                         |
| Wilcoxon     | -0.02 (0.02, -0.05)  | 0 (0.02, -0.02)         | 0.02 (0.04, -0.01)      |                         |
| DESeq2       | 0.01 (0.03, -0.01)   | 0.05 (0.06, 0.03)***    | 0.01 (0.02, 0)          |                         |
| edgeR        | 0.01 (0.01, 0.01)*** | -0.01 (-0.01, -0.01)*** | -0.01 (-0.01, -0.01)*** |                         |
| ANCOM        | 0 (0, 0)             | 0 (0, 0)                | 0 (0, 0)                |                         |
| DMM HMC      | 0.01 (0.02, -0.01)   | 0.1 (0.11, 0.09)***     | 0.1 (0.11, 0.09)***     |                         |
| DMM VB       | -0.02 (0, -0.04)*    | 0.1 (0.12, 0.09)***     | 0.11 (0.13, 0.1)***     |                         |
| Aldex T-test | 0.09 (0.11, 0.07)*** | 0.14 (0.15, 0.12)***    | 0.19 (0.21, 0.18)***    |                         |
| mvabund      | -0.01 (0.01, -0.02)  | 0.01 (0.02, 0)*         | 0 (0.01, -0.01)         |                         |
| Method       | Num. of features     | Num. of observations    | Num. of replicates      | Noise                   |
| MCMC         | 0 (0, 0)***          | 0 (0, 0)                | 0 (0, 0)**              | -0.01 (-0.01, -0.02)*** |
| Wilcoxon     | 0 (0, 0)             | 0 (0, 0)                | 0 (0, 0)                | 0 (0.01, 0)             |
| DESeq2       | 0 (0, 0)*            | 0 (0, 0)***             | 0 (0, 0)***             | 0 (0.01, 0)***          |
| edgeR        | 0 (0, 0)***          | 0 (0, 0)                | 0 (0, 0)                | 0 (0, 0)                |
| ANCOM        | 0 (0, 0)             | 0 (0, 0)                | 0 (0, 0)                | 0 (0, 0)                |
| DMM HMC      | 0 (0, 0)             | 0 (0, 0)*               | 0 (0, 0)***             | 0 (0, 0)                |
| DMM VB       | 0 (0, 0)**           | 0 (0, 0)                | 0 (0, 0)***             | 0 (0.01, 0)             |
| Aldex T-test | 0 (0, 0)***          | 0 (0, 0)                | 0 (0, 0)**              | -0.01 (-0.01, -0.02)*** |
| mvabund      | 0 (0, 0)             | 0 (0, 0)                | 0 (0, 0)                | 0 (0, 0)                |

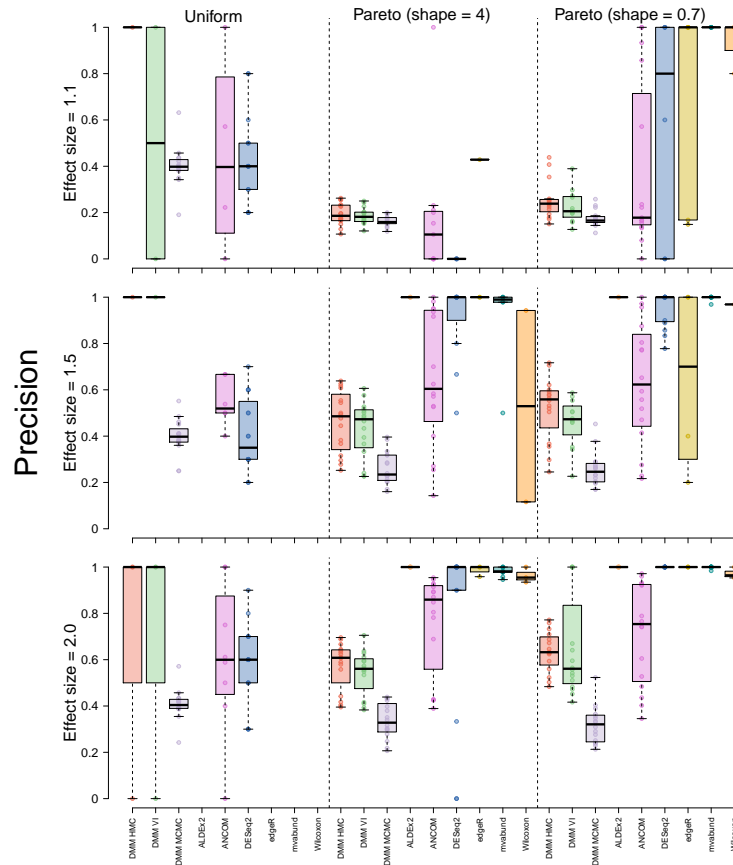

Figure S1: Precision of all methods competed. Precision was calculated as  $\frac{TP}{TP+FP}$ , where TP stands for true positives and FP for false positives. This is a measure of how many of the positives suggested by the model are actually true. Precision is shown on the y axis and model type on the x axis. Rows describe model performance when identifying features that differ between treatment groups by a certain effect size (e.g., 1.1 in the top row). Each row is broken up into three columns that are separated by a dotted line. These columns show results for data with differing rank abundance profiles.

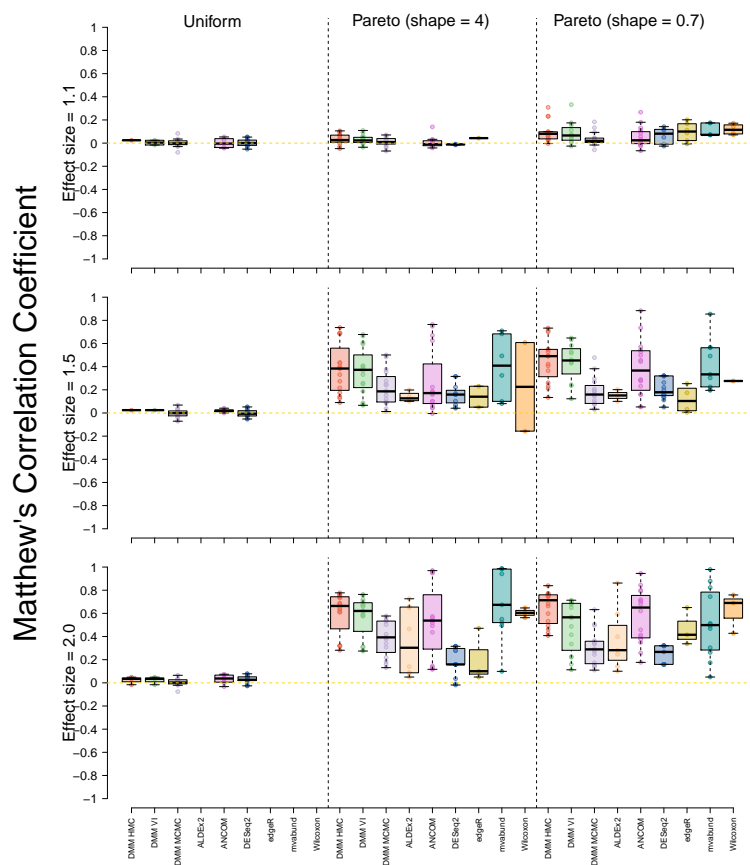

Figure S2: Matthew's Correlation Coefficient (MCC) of all methods competed. MCC is the correlation between actual and predicted classifications and varies from one (perfect classification) to negative one (completely incorrect classification). An MCC of zero denotes the classifier performed no better than random guessing. MCC was calculated as  $\frac{TP \times TN - FP \times FN}{\sqrt{(TP + FP)(TP + FN)(TN + FP)(TN + FN)}}$ , where TP stands for true positives, FP for false positives, TN for true negatives, and FN for false negatives. MCC is shown on the y axis and model type on the x axis. Rows describe model performance when identifying features that differ between treatment groups by a certain effect size (e.g., 1.1 in the top row). Each row is broken up into three columns that are separated by a dotted line. These columns show results for data with differing rank abundance profiles.

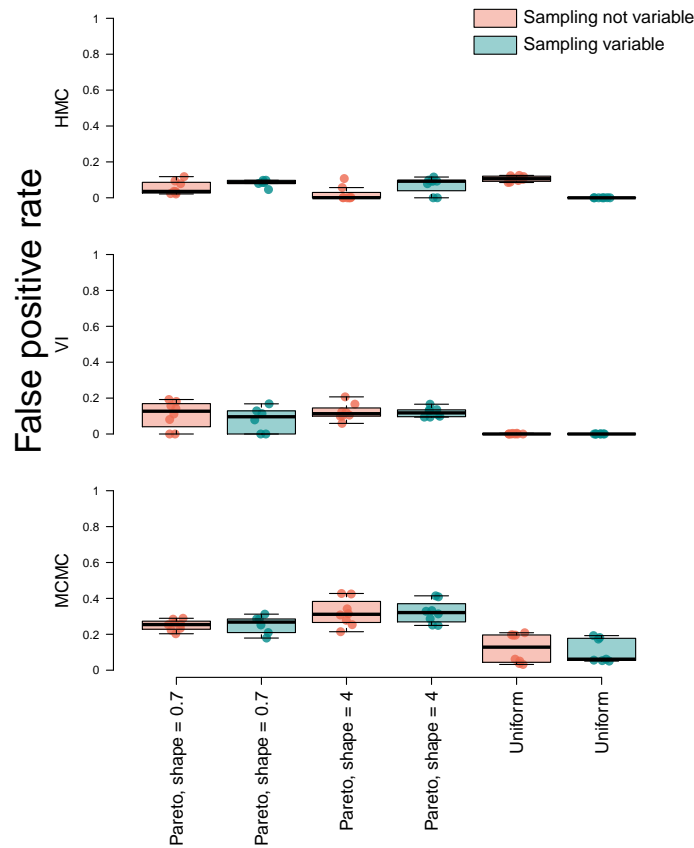

Figure S3: False positive rate of DMM as implemented via HMC (top row), VI (middle row), and MCMC (bottom row) when confronted with data where no features were expected to differ between sampling groups. The distribution used to simulate the data is shown on the x axis (see main text). Each point is the result from a different simulated data set; data were simulated using a variety of parameters encompassing a representative subset of the attributes considered in our main simulation (number of features  $\in \{500, 2000\}$ , 10000 samples per replicate, number of replicates  $\in \{10, 50\}$ , intensity parameter  $\in \{0.5, 3\}$ ). FPR was calculated as the proportion of features that were incorrectly estimated to vary between treatment groups (false positives divided by the sum of false positives and true negatives). For a subset of the simulated data, sampling depth was made to vary by as much as two orders of magnitude between replicates (i.e., a sum of 1000 in one replicate and a sum of 100,000 in another replicate within the same sampling group). The results from analysis of data with variation in sampling depth are shown in blue.

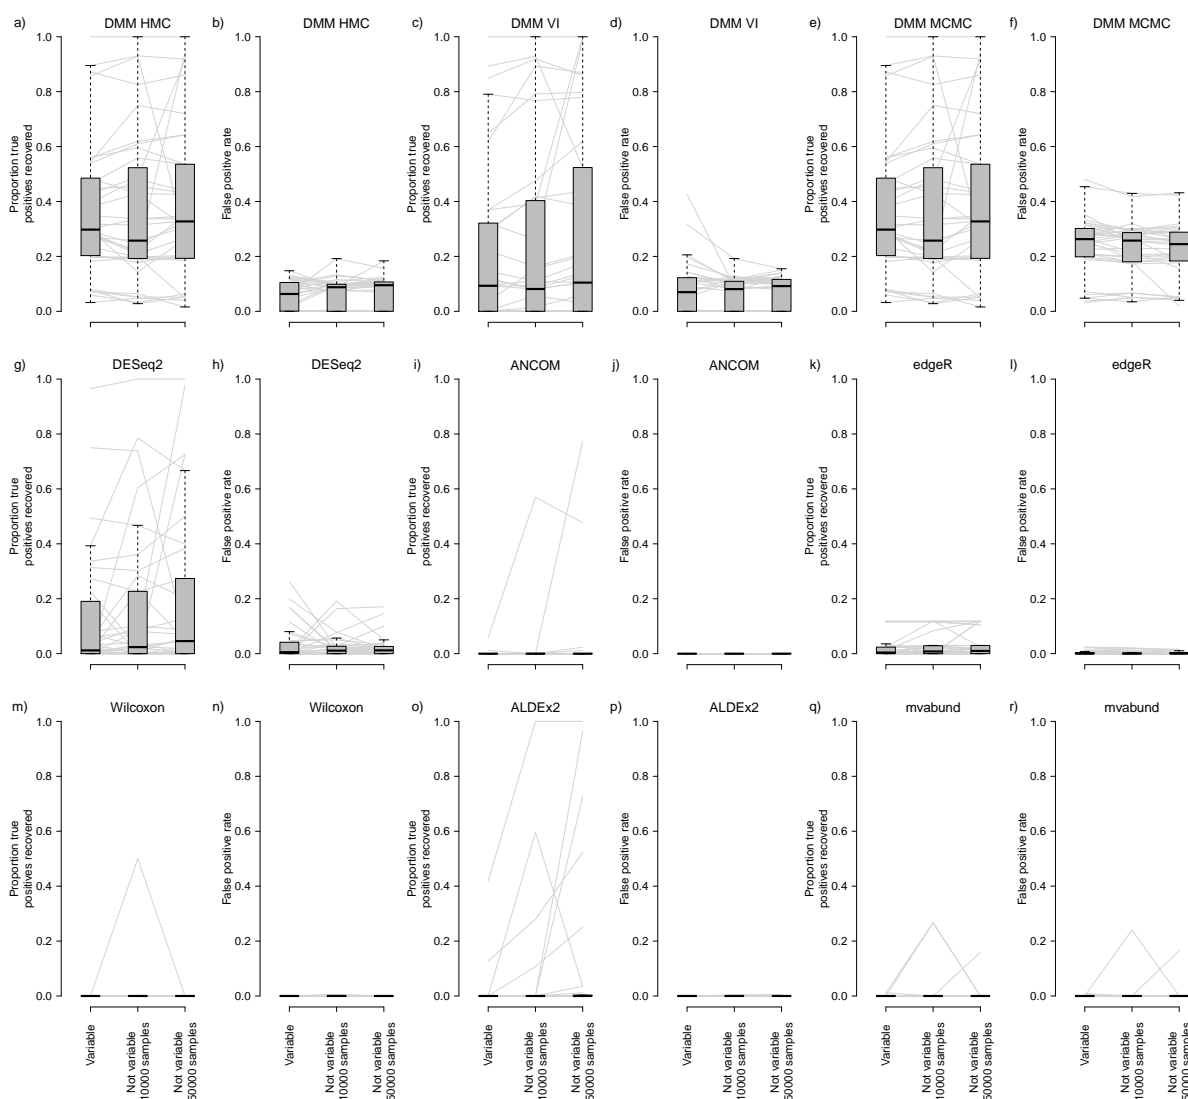

Figure S4: Effect of variation in sampling effort on model performance. Replicates were made to differ in sampling effort by up to two orders of magnitude (see main text) and the results from analysis of these data are shown in the first box of each panel (“variable”). Subsequent boxes show results from data where among replicate sampling effort was fixed at either 10,000 or 50,000 samples. Gray lines connect results from data sets that were simulated using identical parameters, except for sampling effort. Data were simulated using a representative subset of the parameters used for our main simulation experiment. Boxplots follow the format described in Fig. 3.

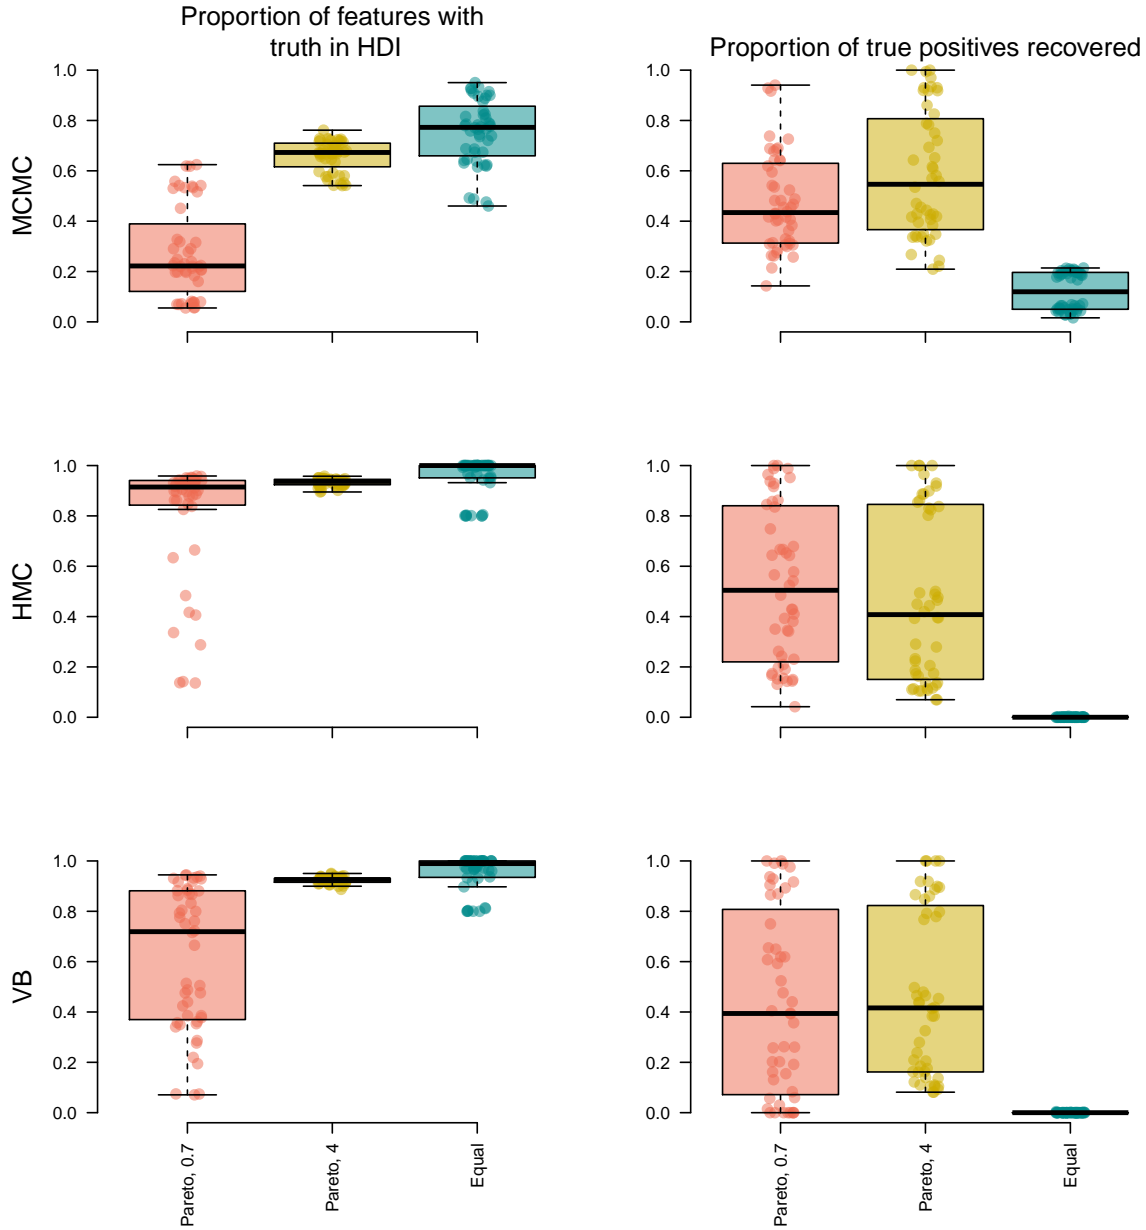

Figure S5: Proportion of times that high density intervals of posterior probability distributions for Dirichlet parameters ( $\vec{\pi}$  parameters) included the true, simulated parameters (left column). In the right column, the proportion of true positives recovered is shown. Boxplots are shown for results from data simulated to have differing rank abundance curves (“Pareto, 0.7” was most skewed, “Equal” was least skewed; see main text). Boxplots follow the format described in Fig. 3.

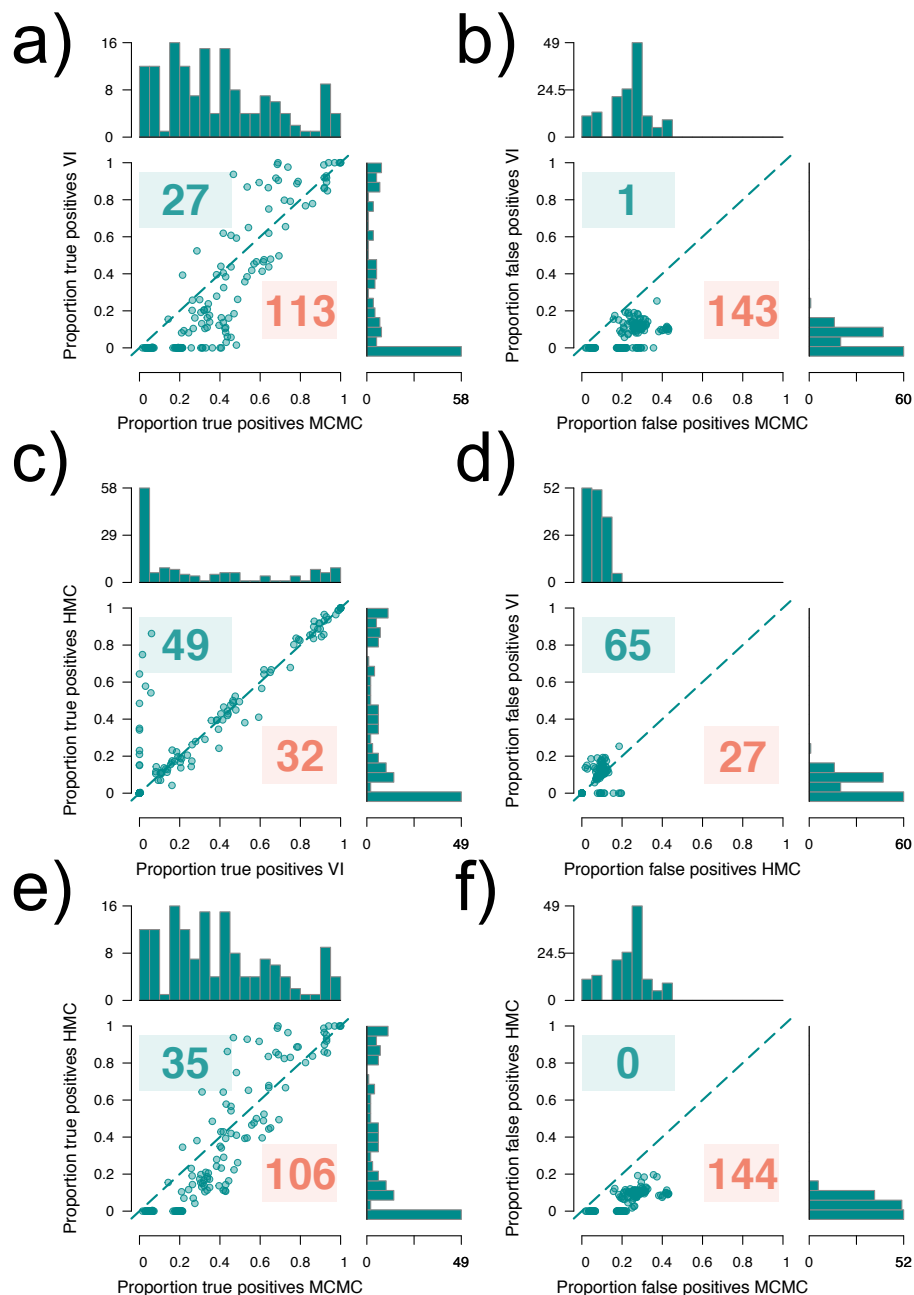

Figure S6: Comparison of true positive rate among the three parameter estimation methods tested (panels a,c,e). Comparison of false discovery rate between the same three methods (b,d,f). This figure corresponds in format to Fig. 4. Marginal histograms are provided to aid visualization. For details of model implementation and parameter estimation methods, see the main text (VI: variational inference; HMC: Hamiltonian Monte Carlo; MCMC: JAGS model implementation).

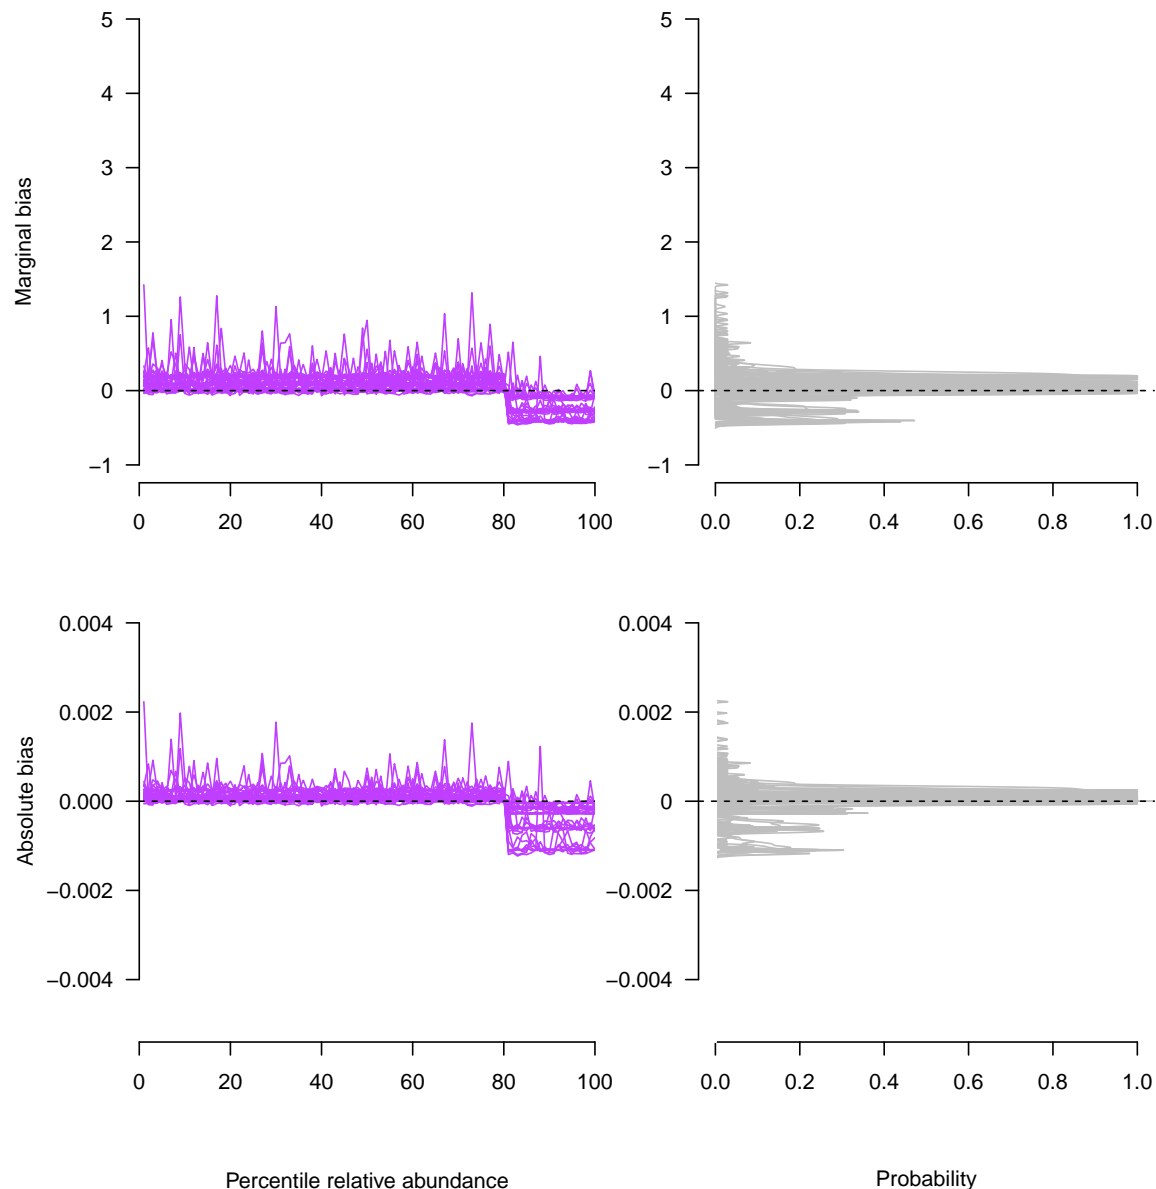

Figure S7: Bias of DMM as implemented via HMC as a function of feature relative abundance for data sets simulated using a uniform rank abundance distribution. Percentiles of relative abundances for each dataset were calculated and are shown on the x axis of bias plots (left column), thus normalizing for the differences in numbers of features among datasets. Bias (defined as the difference between predicted values and the truth) in  $\pi$  parameters is shown on the y axis. Marginal bias was calculated as absolute bias divided by the relative abundance of the focal parameter. Plots in the right column show probability densities for the different bias values shown in the left column. Each line denotes results from a simulated dataset. Results shown here are from a representative subset of the datasets simulated as part of our main experiment including 99 datasets with variable counts among replicates (see Methods) and 45 datasets with invariant counts among replicates. All values that we considered as part of our main experiment for number of features, number of observations, number of replicates, precision ( $\theta$ ), and effect sizes were included in the subset of the datasets analyzed here.



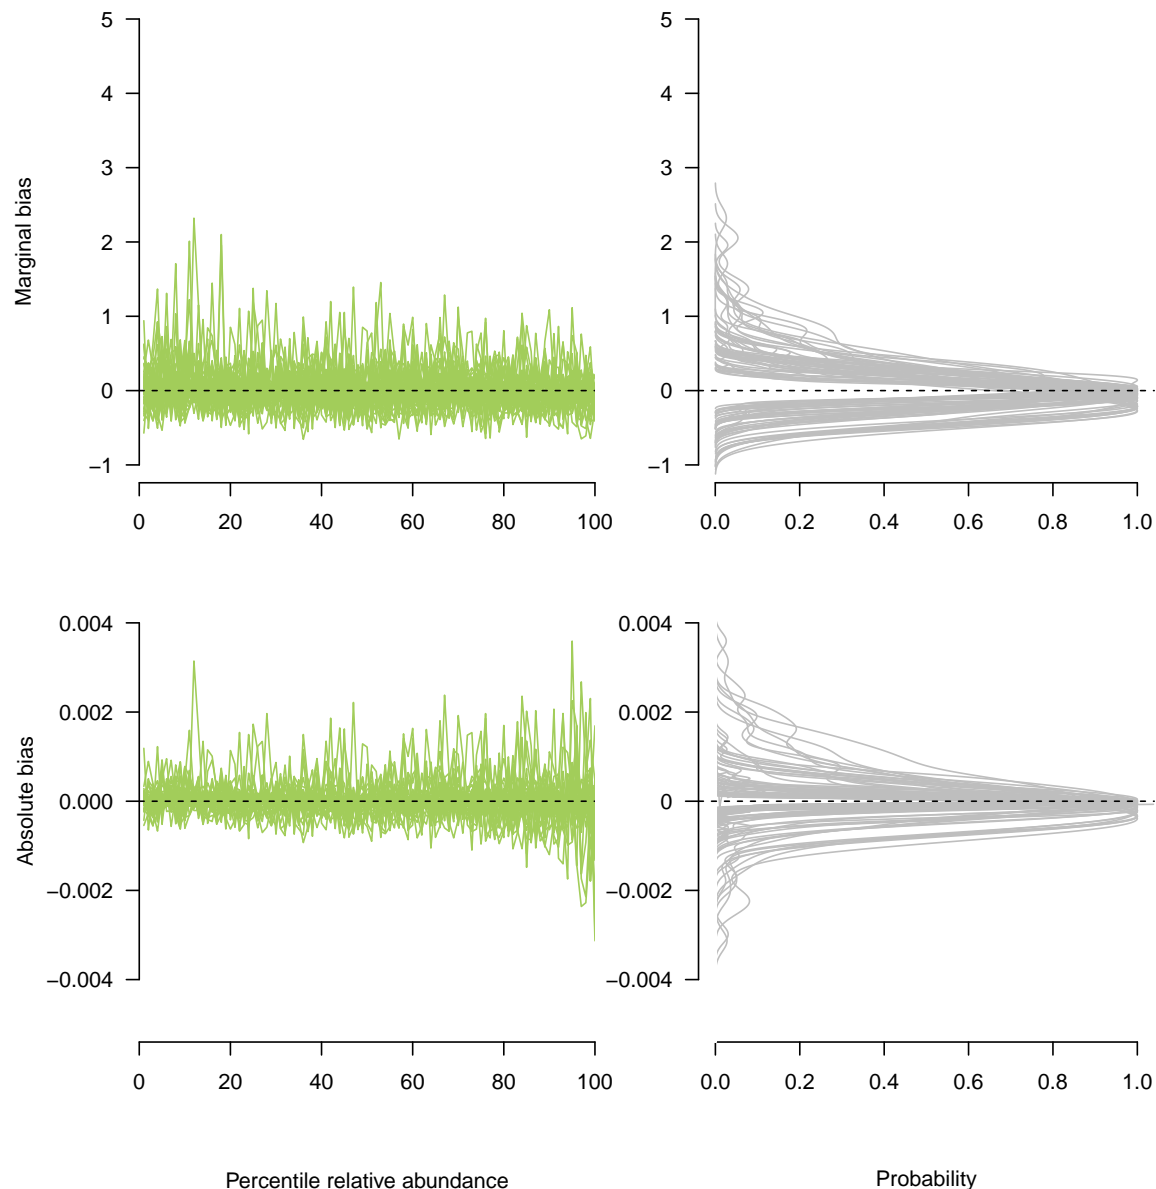

Figure S8: Bias of DMM as implemented via HMC as a function of feature relative abundance for data sets simulated using a moderately skewed rank abundance distribution (Pareto = 4). Percentiles of relative abundances for each dataset were calculated and are shown on the x axis of bias plots (left column), thus normalizing for the differences in numbers of features among datasets. Bias (defined as the difference between predicted values and the truth) in  $\pi$  parameters is shown on the y axis. Marginal bias was calculated as absolute bias divided by the relative abundance of the focal parameter. Plots in the right column show probability densities for the different bias values shown in the left column. Each line denotes results from a simulated data set. Results shown here are from a representative subset of the datasets simulated as part of our main experiment including 99 datasets with variable counts among replicates (see Methods) and 45 datasets with invariant counts among replicates. All values that we considered as part of our main experiment for number of features, number of observations, number of replicates, precision ( $\theta$ ), and effect sizes were included in the subset of the datasets analyzed here.

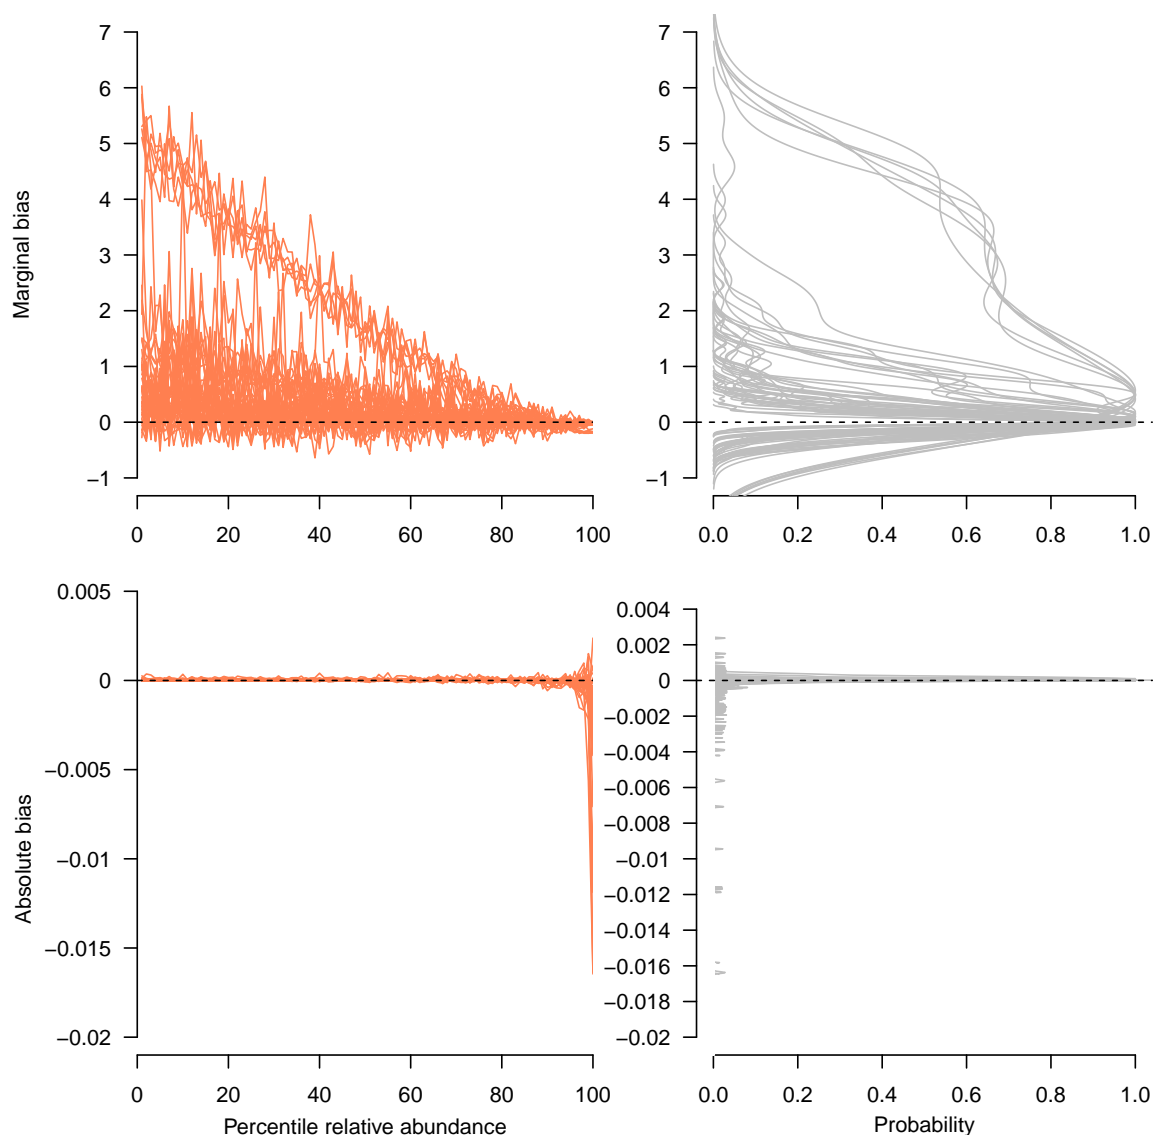

Figure S9: Bias of DMM as implemented via HMC as a function of feature relative abundance for data sets simulated using a highly skewed rank abundance distribution (Pareto = 0.7). Percentiles of relative abundances for each dataset were calculated and are shown on the x axis of bias plots (left column), thus normalizing for the differences in numbers of features among datasets. Bias (defined as the difference between predicted values and the truth) in  $\pi$  parameters is shown on the y axis. Marginal bias was calculated as absolute bias divided by the relative abundance of the focal parameter. Plots in the right column show probability densities for the different bias values shown in the left column. Each line denotes results from a simulated data set. Results shown here are from a representative subset of the datasets simulated as part of our main experiment including 99 datasets with variable counts among replicates (see Methods) and 45 datasets with invariant counts among replicates. All values that we considered as part of our main experiment for number of features, number of observations, number of replicates, precision ( $\theta$ ), and effect sizes were included in the subset of the datasets analyzed here.

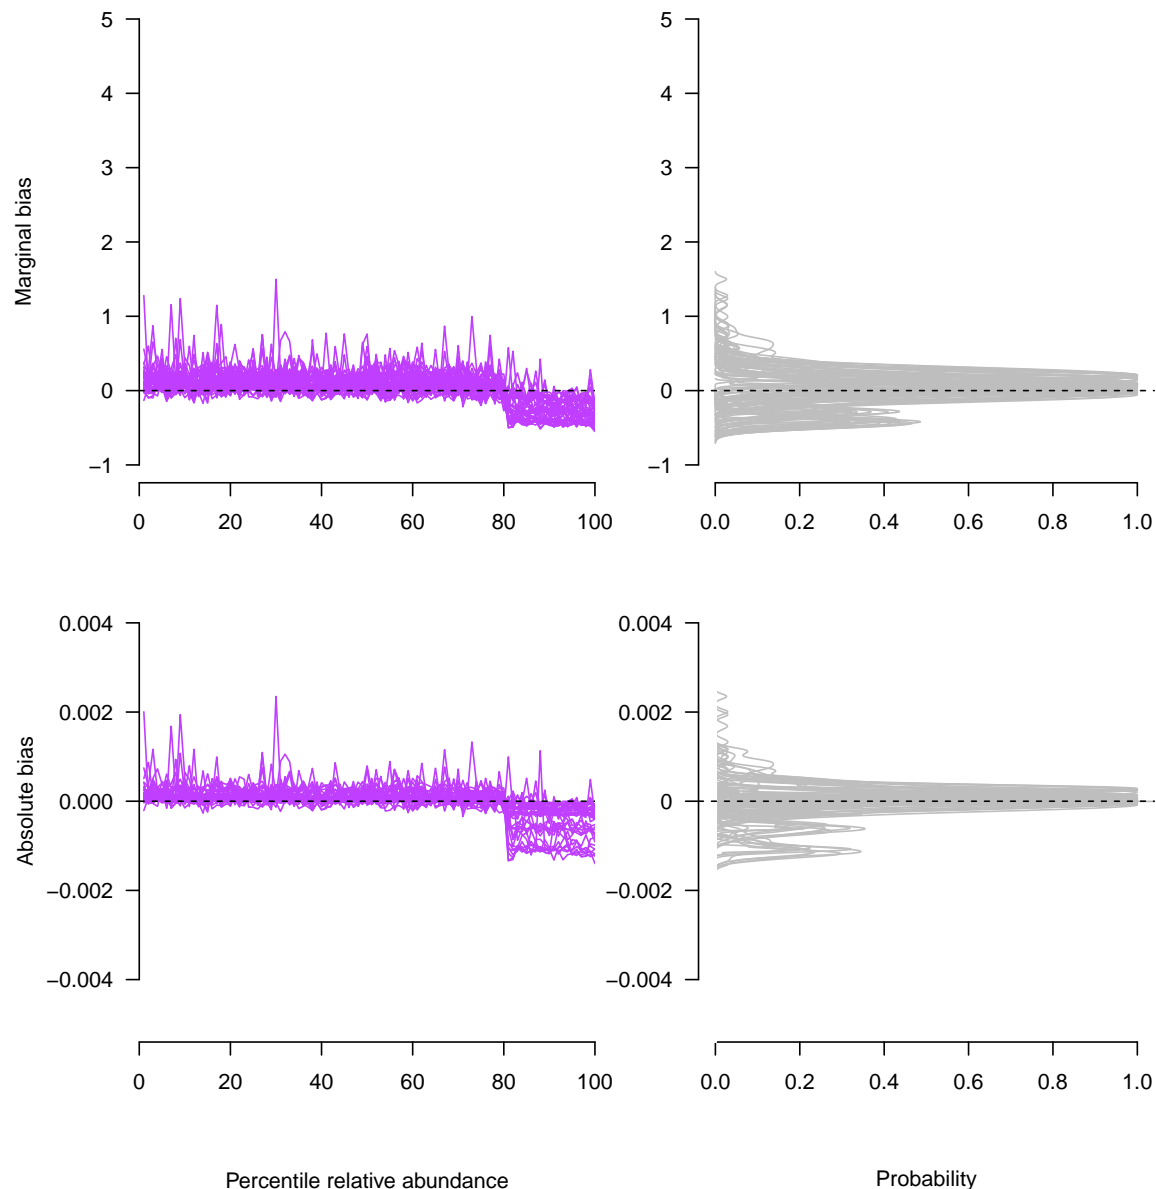

Figure S10: Bias of DMM as implemented via VI as a function of feature relative abundance for data sets simulated using a uniform rank abundance distribution. Percentiles of relative abundances for each dataset were calculated and are shown on the x axis of bias plots (left column), thus normalizing for the differences in numbers of features among datasets. Bias (defined as the difference between predicted values and the truth) in  $\pi$  parameters is shown on the y axis. Marginal bias was calculated as absolute bias divided by the relative abundance of the focal parameter. Plots in the right column show probability densities for the different bias values shown in the left column. Each line denotes results from a simulated data set. Results shown here are from a representative subset of the datasets simulated as part of our main experiment including 99 datasets with variable counts among replicates (see Methods) and 45 datasets with invariant counts among replicates. All values that we considered as part of our main experiment for number of features, number of observations, number of replicates, precision ( $\theta$ ), and effect sizes were included in the subset of the datasets analyzed here.

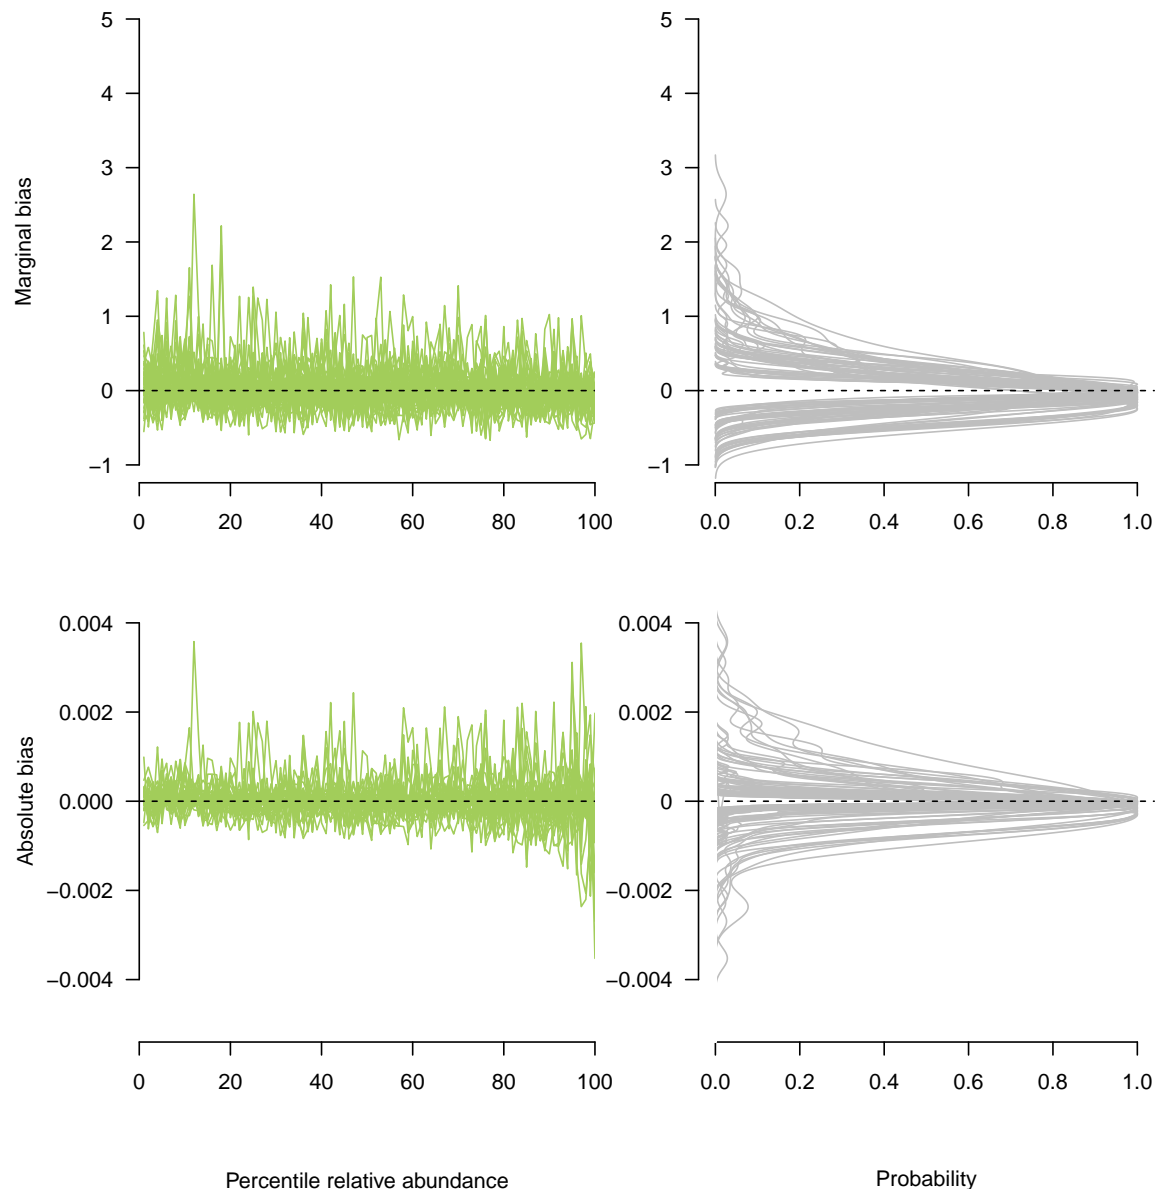

Figure S11: Bias of DMM as implemented via VI as a function of feature relative abundance for data sets simulated using a moderately skewed rank abundance distribution (Pareto = 4). Percentiles of relative abundances for each dataset were calculated and are shown on the x axis of bias plots (left column), thus normalizing for the differences in numbers of features among datasets. Bias (defined as the difference between predicted values and the truth) in  $\pi$  parameters is shown on the y axis. Marginal bias was calculated as absolute bias divided by the relative abundance of the focal parameter. Plots in the right column show probability densities for the different bias values shown in the left column. Each line denotes results from a simulated data set. Results shown here are from a representative subset of the datasets simulated as part of our main experiment including 99 datasets with variable counts among replicates (see Methods) and 45 datasets with invariant counts among replicates. All values that we considered as part of our main experiment for number of features, number of observations, number of replicates, precision ( $\theta$ ), and effect sizes were included in the subset of the datasets analyzed here.

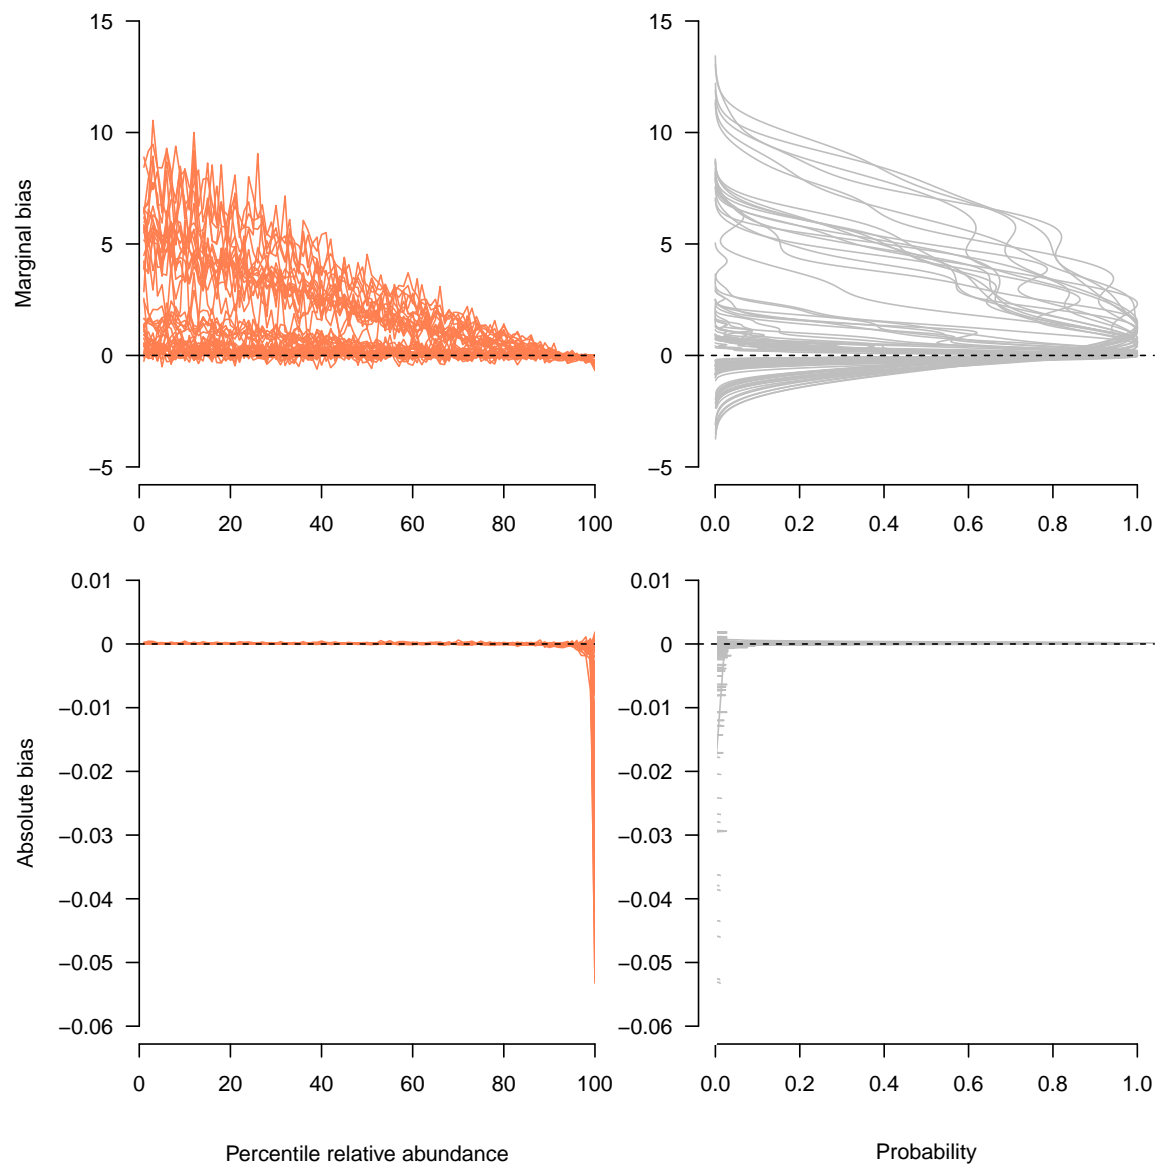

Figure S12: Bias of DMM as implemented via VI as a function of feature relative abundance for data sets simulated using a highly skewed rank abundance distribution (Pareto = 0.7). Percentiles of relative abundances for each dataset were calculated and are shown on the x axis of bias plots (left column), thus normalizing for the differences in numbers of features among datasets. Bias (defined as the difference between predicted values and the truth) in  $\pi$  parameters is shown on the y axis. Marginal bias was calculated as absolute bias divided by the relative abundance of the focal parameter. Plots in the right column show probability densities for the different bias values shown in the left column. Each line denotes results from a simulated data set. Results shown here are from a representative subset of the datasets simulated as part of our main experiment including 99 datasets with variable counts among replicates (see Methods) and 45 datasets with invariant counts among replicates. All values that we considered as part of our main experiment for number of features, number of observations, number of replicates, precision ( $\theta$ ), and effect sizes were included in the subset of the datasets analyzed here.

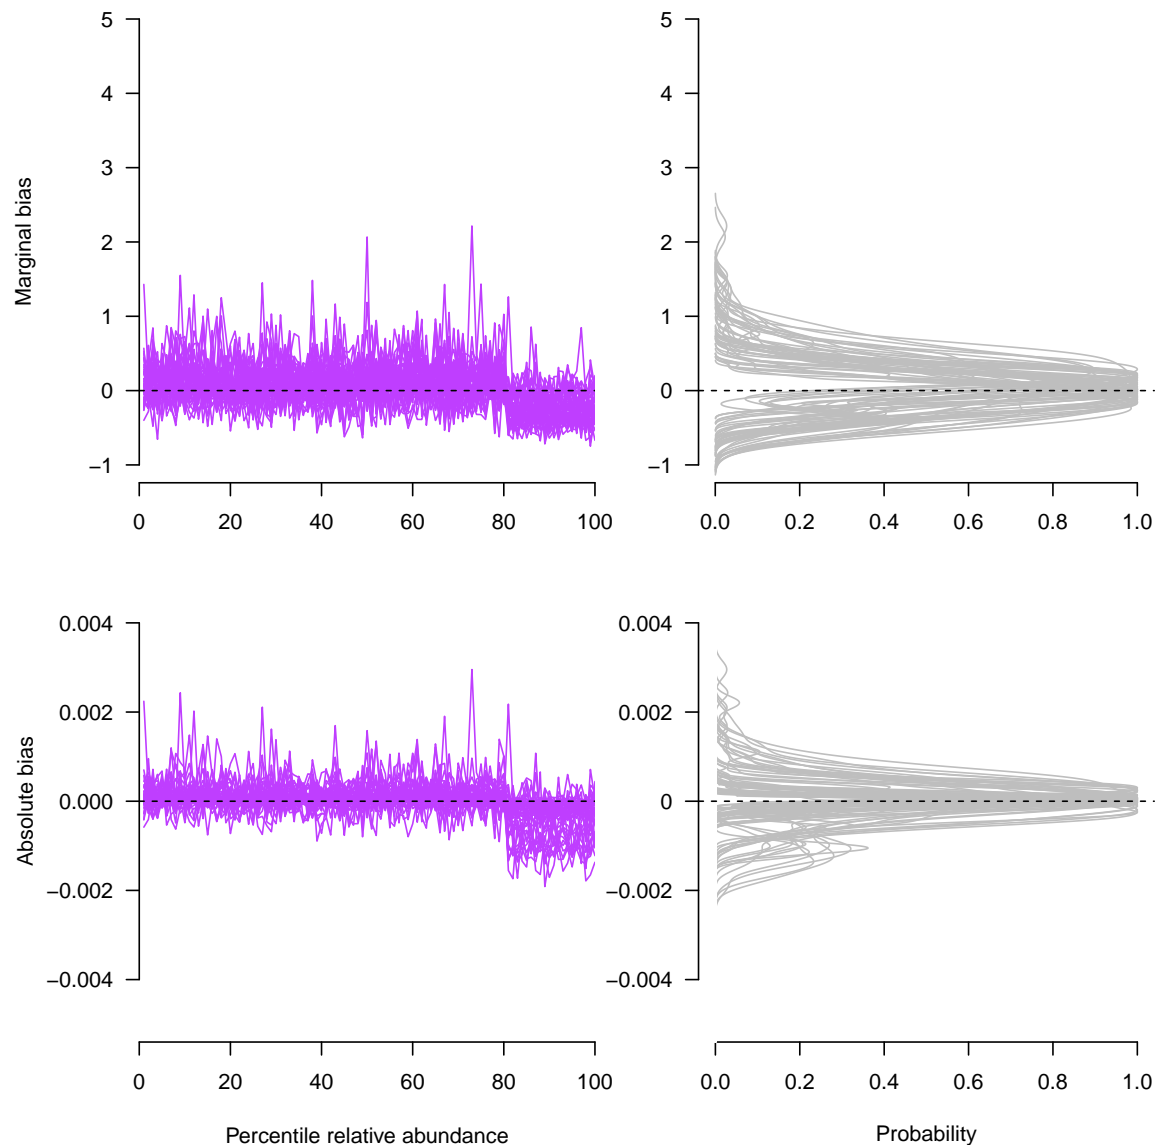

Figure S13: Bias of DMM as implemented via MCMC (via JAGS) as a function of feature relative abundance for data sets simulated using a uniform rank abundance distribution. Percentiles of relative abundances for each dataset were calculated and are shown on the x axis of bias plots (left column), thus normalizing for the differences in numbers of features among datasets. Bias (defined as the difference between predicted values and the truth) in  $\pi$  parameters is shown on the y axis. Marginal bias was calculated as absolute bias divided by the relative abundance of the focal parameter. Plots in the right column show probability densities for the different bias values shown in the left column. Each line denotes results from a simulated data set. Results shown here are from a representative subset of the datasets simulated as part of our main experiment including 99 datasets with variable counts among replicates (see Methods) and 45 datasets with invariant counts among replicates. All values that we considered as part of our main experiment for number of features, number of observations, number of replicates, precision ( $\theta$ ), and effect sizes were included in the subset of the datasets analyzed here.

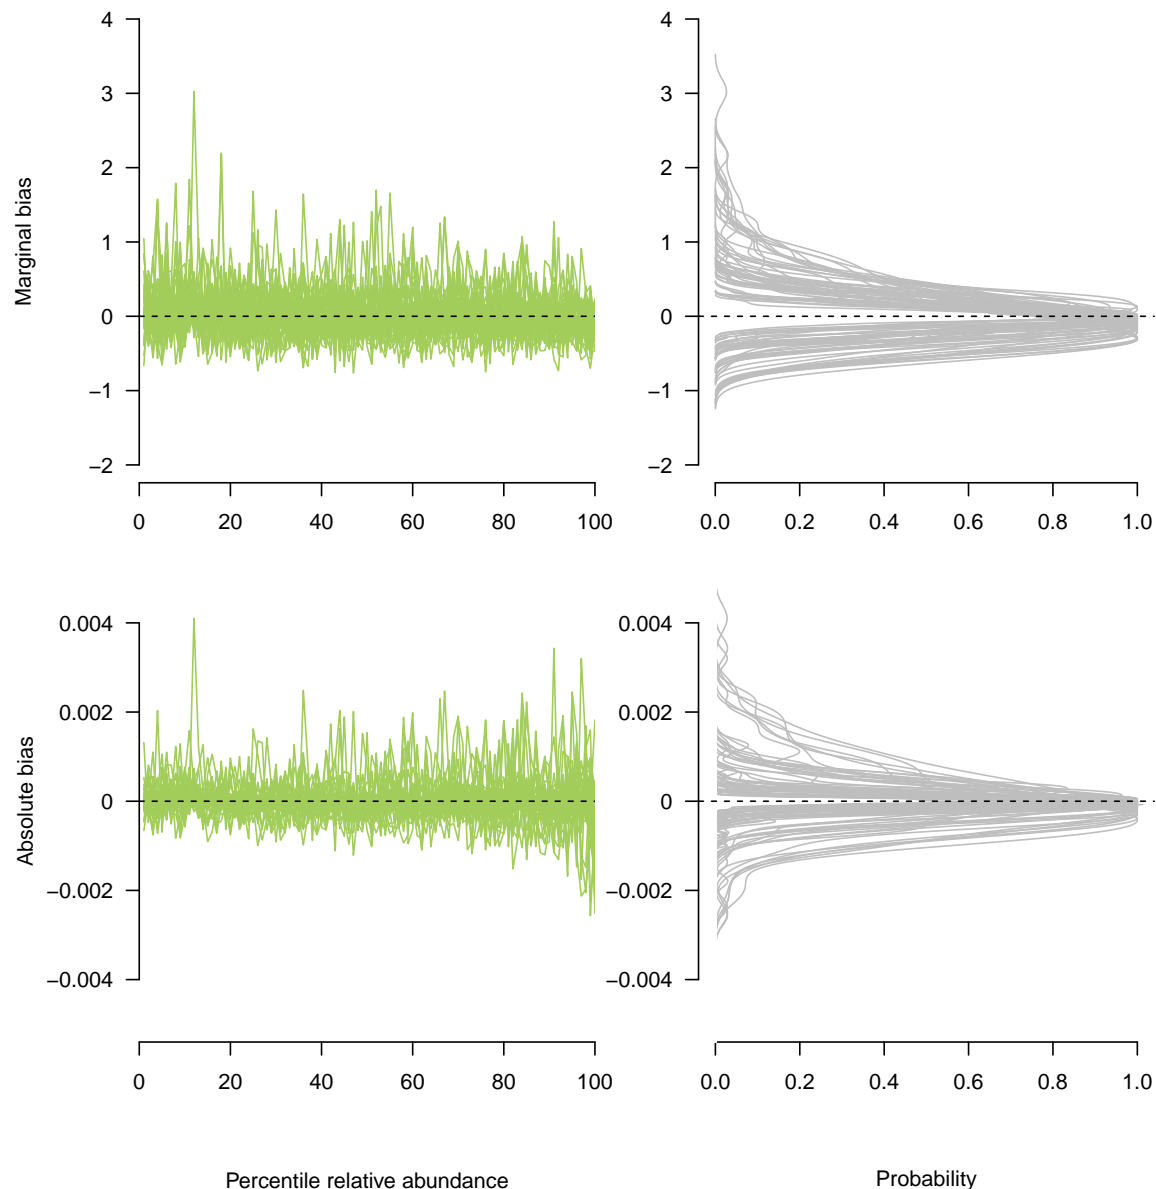

Figure S14: Bias of DMM as implemented via MCMC (via JAGS) as a function of feature relative abundance for data sets simulated using a moderately skewed rank abundance distribution (Pareto = 4). Percentiles of relative abundances for each dataset were calculated and are shown on the x axis of bias plots (left column), thus normalizing for the differences in numbers of features among datasets. Bias (defined as the difference between predicted values and the truth) in  $\pi$  parameters is shown on the y axis. Marginal bias was calculated as absolute bias divided by the relative abundance of the focal parameter. Plots in the right column show probability densities for the different bias values shown in the left column. Each line denotes results from a simulated data set. Results shown here are from a representative subset of the datasets simulated as part of our main experiment including 99 datasets with variable counts among replicates (see Methods) and 45 datasets with invariant counts among replicates. All values that we considered as part of our main experiment for number of features, number of observations, number of replicates, precision ( $\theta$ ), and effect sizes were included in the subset of the datasets analyzed here.

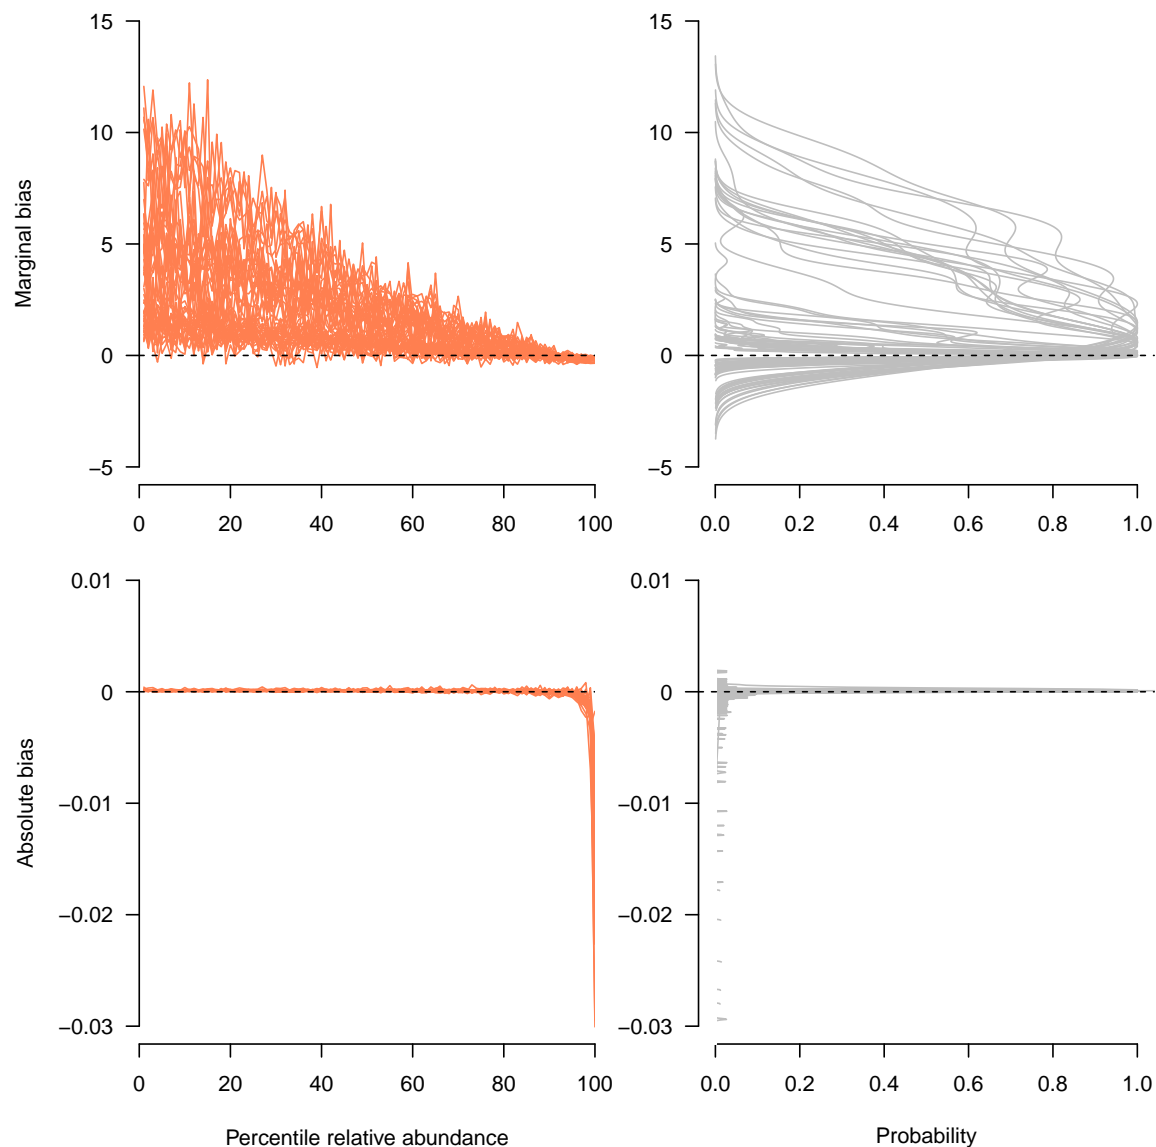

Figure S15: Bias of DMM as implemented via MCMC (via JAGS) as a function of feature relative abundance for data sets simulated using a highly skewed rank abundance distribution (Pareto = 0.7). Percentiles of relative abundances for each dataset were calculated and are shown on the x axis of bias plots (left column), thus normalizing for the differences in numbers of features among datasets. Bias (defined as the difference between predicted values and the truth) in  $\pi$  parameters is shown on the y axis. Plots in the right column show probability densities for the different bias values shown in the left column. Each line denotes results from a simulated data set. Results shown here are from a representative subset of the datasets simulated as part of our main experiment including 99 datasets with variable counts among replicates (see Methods) and 45 datasets with invariant counts among replicates. All values that we considered as part of our main experiment for number of features, number of observations, number of replicates, precision ( $\theta$ ), and effect sizes were included in the subset of the datasets analyzed here.



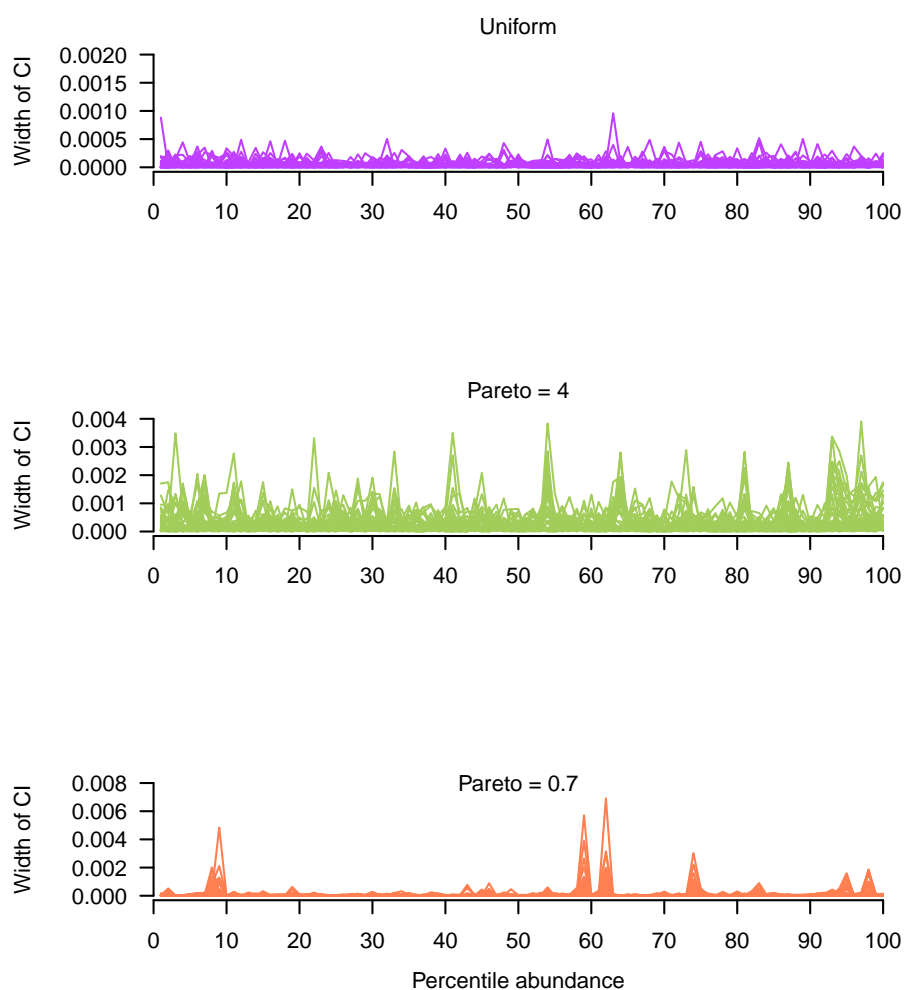

Figure S16: Width of credible intervals for  $\pi$  parameters estimated using DMM as implemented via HMC (using the **Stan** software) as a function of feature relative abundance and rank abundance profile of the data (see Fig. 2). Percentiles of relative abundances for each dataset were calculated and are shown on the x axis of bias plots (left column), thus normalizing for the differences in numbers of features among datasets. Credible interval width (defined as the absolute value of the difference between the 2.5 and 97.5 percentiles of the estimated posterior probability distribution) of  $\pi$  parameters is shown on the y axis. Plots in the right column show probability densities for the different bias values shown in the left column. Each line denotes results from a simulated data set. Results shown here are from a representative subset of the datasets simulated as part of our main experiment including 99 datasets with variable counts among replicates (see Methods) and 45 datasets with invariant counts among replicates. All values that we considered as part of our main experiment for number of features, number of observations, number of replicates, precision ( $\theta$ ), and effect sizes were included in the subset of the datasets analyzed here.

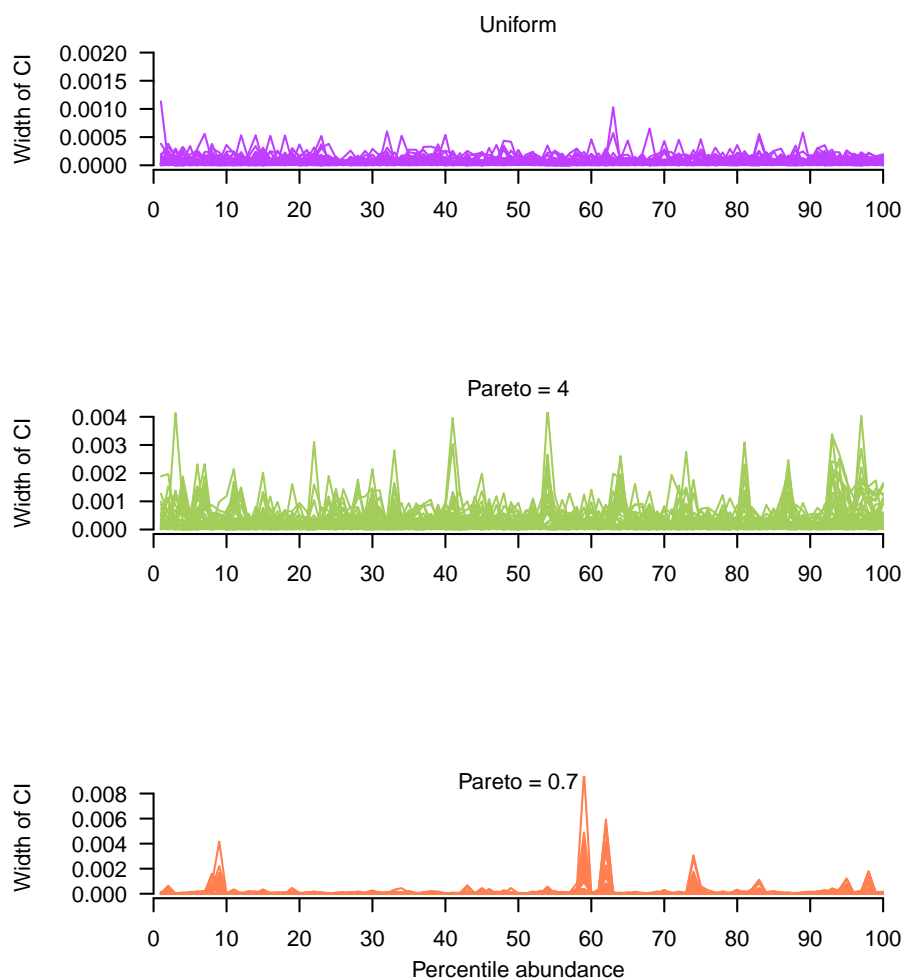

Figure S17: Width of credible intervals for  $\pi$  parameters estimated using DMM as implemented via VI (using the **Stan** software) as a function of feature relative abundance and rank abundance profile of the data (see Fig. 2). Percentiles of relative abundances for each dataset were calculated and are shown on the x axis of bias plots (left column), thus normalizing for the differences in numbers of features among datasets. Credible interval width (defined as the absolute value of the difference between the 2.5 and 97.5 percentiles of the estimated posterior probability distribution) of  $\pi$  parameters is shown on the y axis. Results shown here are from a representative subset of the datasets simulated as part of our main experiment including 99 datasets with variable counts among replicates (see Methods) and 45 datasets with invariant counts among replicates. All values that we considered as part of our main experiment for number of features, number of observations, number of replicates, precision ( $\theta$ ), and effect sizes were included in the subset of the datasets analyzed here.

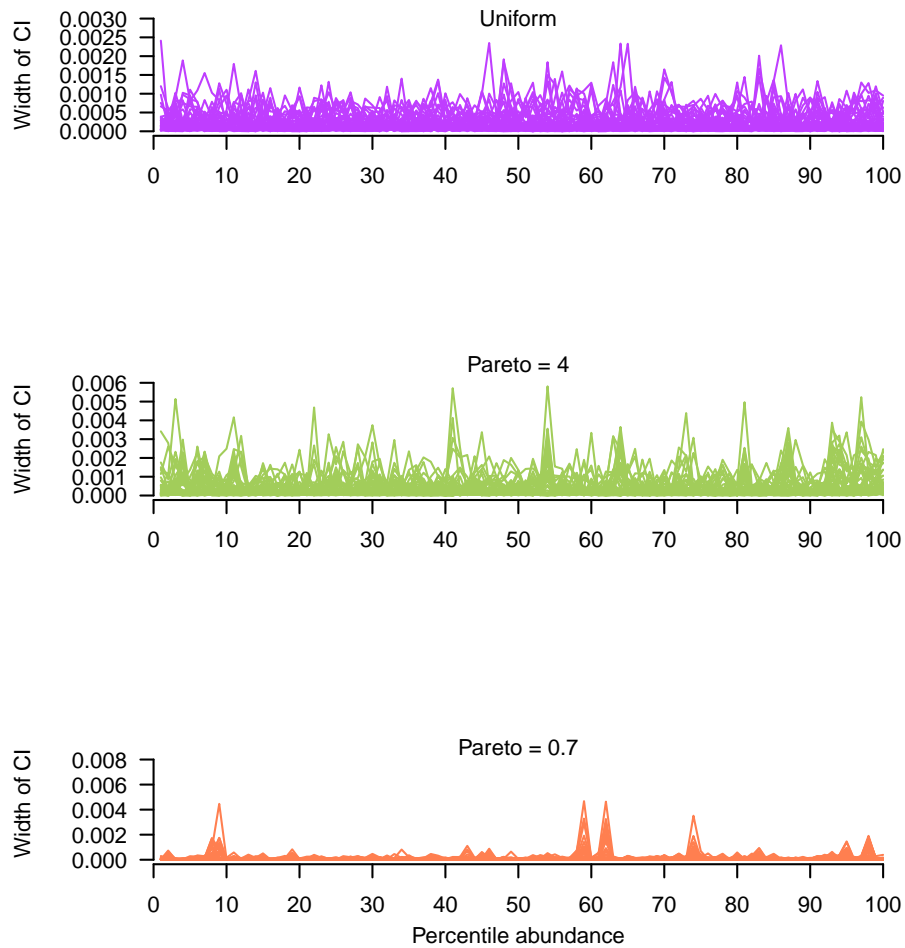

Figure S18: Width of credible intervals for  $\pi$  parameters estimated using DMM as implemented via MCMC (using the JAGS software) as a function of feature relative abundance and rank abundance profile of the data (see Fig. 2). Percentiles of relative abundances for each dataset were calculated and are shown on the x axis of bias plots (left column), thus normalizing for the differences in numbers of features among datasets. Credible interval width (defined as the absolute value of the difference between the 2.5 and 97.5 percentiles of the estimated posterior probability distribution) of  $\pi$  parameters is shown on the y axis. Plots in the right column show probability densities for the different bias values shown in the left column. Each line denotes results from a simulated data set. Results shown here are from a representative subset of the datasets simulated as part of our main experiment including 99 datasets with variable counts among replicates (see Methods) and 45 datasets with invariant counts among replicates. All values that we considered as part of our main experiment for number of features, number of observations, number of replicates, precision ( $\theta$ ), and effect sizes were included in the subset of the datasets analyzed here.

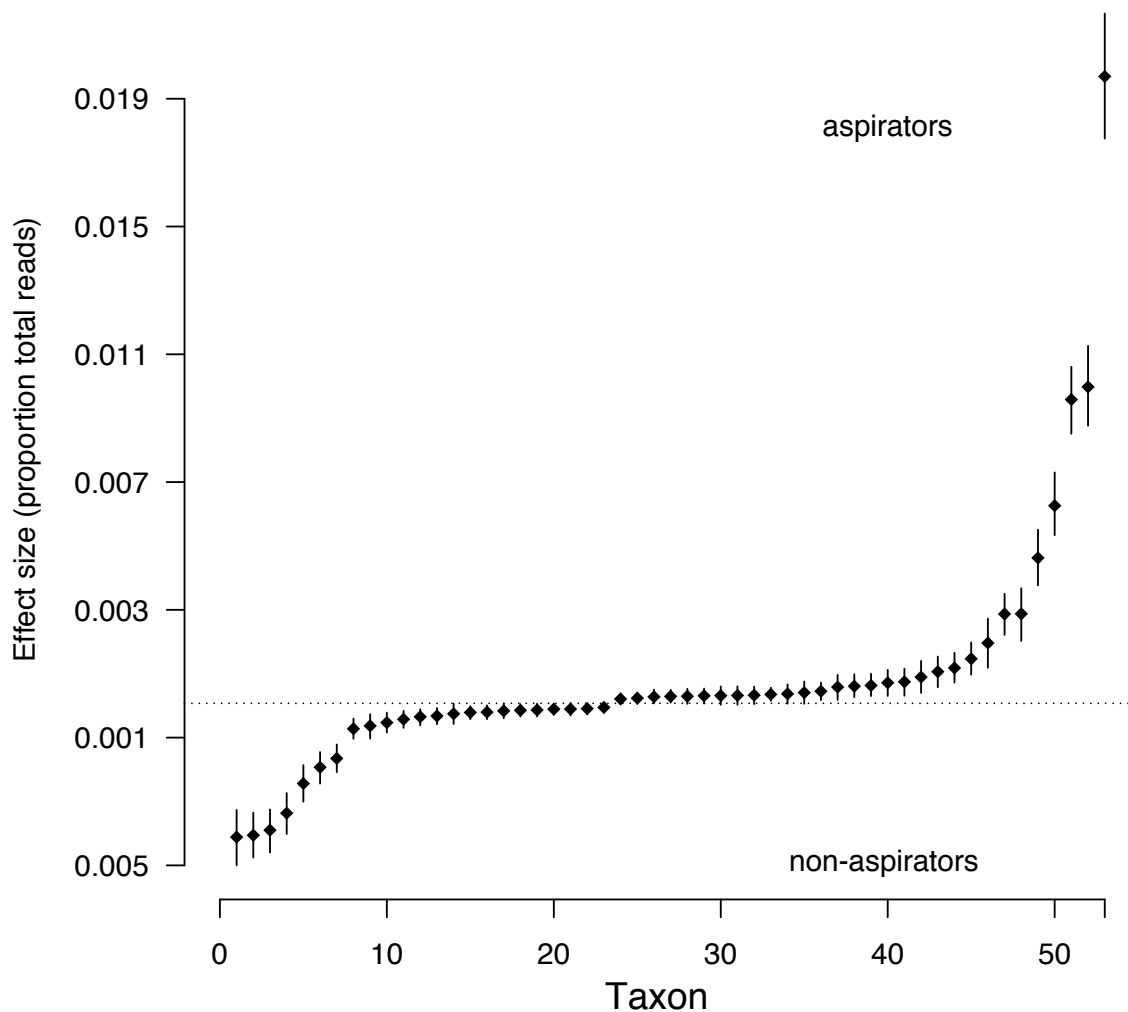

Figure S19: Lung inhabiting bacteria that shifted in relative abundance between aspirating and non-aspirating subjects. Data analyzed were made publicly available by Duvall et al. (2019). The estimated relative abundance of taxa in non-aspirating patients ( $\bar{\pi}$  parameters) was subtracted from the relative abundance of taxa in aspirating patients and this difference is shown on the vertical axis. Thus, points on either side of zero (shown as absolute values) correspond with a taxon that was more abundant in that sampling group (non-aspirators below zero, aspirators above zero). Points are means of PPDs of differences; whiskers show the 95% equal-tailed probability intervals of PPDs. Bacteria are indexed along the horizontal axis and ordered by effect size.

# How to implement Bayesian Dirichlet-multinomial modeling in R

*Joshua G. Harrison, W. John Calder, Vivaswat Shastry, C. Alex Buerkle*

When a finite number of observations can be ascribed to categories (e.g., observations of taxa or transcripts), the counts of observations of each category can be appropriately modeled using the multinomial distribution. Multinomial parameters define the probability that a given observation belongs to a particular category and these probabilities correspond to the relative abundance of that category in the population that was sampled. Because it accounts for the probability of all categories, the sum of the multinomial parameter vector ( $\vec{p}$ ) is one. For instance, if  $\frac{50}{100}$  of the birds one observed on a long hike were American robins then the maximum likelihood estimate of the multinomial parameter for robins would be 0.5 ( $\frac{x}{n} = \frac{50}{100}$ ) and other parameters would correspond to the relative abundance of the other bird taxa observed. Here we describe how to model multinomial data using a hierarchical Bayesian approach that shares information among replicates via the Dirichlet distribution. The parameters of the Dirichlet distribution allow inference regarding the relative abundance of each category, or feature, within the sampling group.

The goal of the analysis demonstrated here is to identify features (i.e. taxa, transcripts, behavioral preferences) that differ in relative abundance across treatment groups. However, once estimates for feature relative abundance are obtained, these estimates can be passed to additional analyses. We implement modeling using three frameworks (variational inference and Hamiltonian Monte Carlo in Stan, and MCMC [Gibbs and Metropolis-Hastings] sampling in JAGS) to demonstrate the differences and similarities of each.

Be advised that modeling large data sets is computationally expensive, therefore we use a simple, simulated data set for this example. For smaller datasets, say of a few hundred to a thousand features, the model shown here can be run on a desktop system. For larger datasets, computation will take several days, so one may wish to run the model remotely. One trick that can be used to reduce computational expense is to sum uncommon features into a single, composite feature. The counts of this composite feature should be included during modeling, otherwise proportional estimates will be incorrect. Also, run time can be reduced by initializing sampling at values that are likely to be closer to the true values of the parameters to be estimated (e.g.,  $\pi$  parameters in the Dirichlet could be set to the maximum likelihood estimate of the frequency of that feature across replicates). See documentation for Stan or rjags for information on how to initialize chains.

## Simulation

We start this example by simulating some data. Note that the intensity parameter of the Dirichlet distribution controls the degree of among-replicate variation within the data. Higher values for this parameter lead to less variation among replicates. Also, we add a one to every datum so that there are no zero values within the data. This is necessary because zeros can cause infinite density errors in JAGS, due to their contribution to the Dirichlet probability density function. If zeros exist in one's data, then add a one to every count.

```
# library(gtools)
# library(rstan)
# library(rjags)
# library(shinystan)
# library(VGAM)

notus <- 50
nsamples <- 5000
nreps <- 100
intensity <- 1
```

```
comprop <- matrix(0, ncol = notus, nrow = 2)
indprop <- matrix(0, ncol = notus, nrow = nreps)

#Assemblage 1
comprop[1, ] <- rdirichlet(1, c(rep(15, 5), rep(1, notus - 5)))
#Assemblage 2
comprop[2, ] <- rdirichlet(1, c(rep(1, notus - 5), rep(15, 5)))

#Construct data matrix
com <- matrix(0, ncol = notus, nrow = nreps)
for (i in 1:(nreps / 2)) {
  indprop[i, ] <- rdirichlet(1, comprop[1, ] * intensity)
  com[i, ] <- rmultinom(1, nsamples, prob = indprop[i, ])
}
for (i in (1 + nreps / 2):nreps) {
  indprop[i, ] <- rdirichlet(1, comprop[2, ] * intensity)
  com[i, ] <- rmultinom(1, nsamples, prob = indprop[i, ])
}
com <- com + 1
nsamples <- nsamples + 50
```

## Stan model specification

Now we run the model. See the main text for model exposition. First, we load the Stan specification of the model, which, in this case, is in a text file located within the working directory. This can take a few seconds.

```
DM <- stan_model("DM.stan", model_name = "DM")

#This file has the following model within it:

# // Model specification for Dirichlet-Multinomial
# data {
#   int<lower=1> N;
#   int<lower=1> nreps;
#   int<lower=1> notus;
#
#   int<lower=1> start[N];
#   int<lower=1> end[N];
#
#   int datamatrix[nreps, notus];
# }
#
# parameters {
#   real<lower=0> theta[N];
#   simplex[notus] pi[N];
#   simplex[notus] p[nreps];
# }
#
#
# model {
#   for(i in 1:N){
#     target += exponential_lpdf(theta[i] | 0.001);
```

```
# target += dirichlet_lpdf(pi[i] | rep_vector(0.0000001, notus));
# for(j in start[i]:end[i]){
#   target += dirichlet_lpdf(p[j] | theta[i]*pi[i]);
#   target += multinomial_lpmf(datamatrix[j,] | p[j]);
# }
# }
# }
```

## Variational inference in Stan

Now we implement variational inference (VI) to learn parameters of interest. Note how the data are passed in as a named list, the algorithm specified, and the number of samples to be extracted from the estimated posterior specified (“output samples”). For more, see the Stan documentation.

```
ptm <- proc.time()
fitstan_VI <- vb(DM,
  data = list("datamatrix" = com,
             "nreps" = nrow(com),
             "notus" = ncol(com),
             "N" = 2,
             "start" = c(1, nreps/2),
             "end" = c((nreps/2) - 1, nreps)
  ),
  algorithm = "meanfield",
  output_samples = 500,
  check_data = T,
  seed = 123,
  pars <- "pi")
viTime <- c(proc.time() - ptm)[3]
```

Variational inference took 5.959 seconds.

## Hamiltonian Monte Carlo sampling in Stan

Now we implement Hamiltonian Monte Carlo (HMC) using the no U-turn sampling algorithm. Note that the number of chains and cores can be specified (use one core per chain). “warmup” controls model burn in (and should probably be increased for larger data sets). “iter” controls total iterations, so the difference between iter and warmup specifies how many samples of the posterior probability distribution will be extracted. “thin” specifies how many samples to skip before saving another sample (if thin=2 then every other sample will be saved). For more, see the Stan documentation.

```
ptm <- proc.time()
fitstan_HMC <- sampling(DM,
  data = list("datamatrix" = com,
             "nreps" = nrow(com),
             "notus" = ncol(com),
             "N" = 2,
             "start" = c(1, nreps/2),
             "end" = c((nreps/2) - 1, nreps)
  ),
  chains=2,
```

```
warmup = 500,  
iter = 1000,  
thin = 2,  
algorithm = "NUTS",  
cores = 1,  
pars <- "pi",  
verbose = T)  
hmcTime <- c(proc.time() - ptm)[3]
```

Hamiltonian Monte Carlo took 278.297 seconds. Note that this time could be reduced by optimizing “warmup” and “iter”, running each chain on a different core, and providing sensible initialization values. When optimizing run time be sure to check model convergence statistics to ensure that convergence upon a stable posterior probability distribution has been achieved.

## Stan estimation diagnostics

Checking model convergence can be done easily for HMC, but at the time of writing there was no simple way to test effectiveness of VI.

For HMC, the number of effective samples and  $\hat{R}$  can be checked using the following code.

```
summary(fitstan_HMC, pars = "pi", probs = c(0.025, 0.975))$summary
```

The shinystan application is an excellent interface to dig deeper into model performance. See <https://mc-stan.org/users/interfaces/shinystan>

## Model specification and MCMC samples in JAGS

Now we use a very similar specification of the model for the JAGS software to estimate  $\pi$  parameters of the Dirichlet.

Model specification is as follows:

```
community.model.level <- "model{  
  for(i in 1:N){  
    for(j in start[i]:end[i]){  
      datamatrix[j,] ~ dmulti(p[j,], nreads[j])  
      p[j,1:notus] ~ ddirch(pi[i,]*theta[i])  
    }  
  
    pi[i,1:notus] ~ ddirch(alpha)  
    theta[i] ~ dunif(0, 4000)  
  }  
  
  for(k in 1:notus){  
    alpha[k] <- 0.0000001  
  }  
}"
```

Compile and run the model.

```
ptm <- proc.time()  
  
sim.mod.jags <- jags.model(  
  data = data,
```



```
textConnection(community.model.level),
data = list(
  datamatrix = com,
  notus = dim(com)[2],
  nreads = rowSums(com),
  N = 2,
  start = c(1,nreps/2),
  end = c((nreps/2)-1,nreps)
),
n.chains = 2,
n.adapt = 0
)

#Adapt model
iter_needed <- 0
y = FALSE
while(y == FALSE){
  y <- adapt(sim.mod.jags,
             n.iter = 1000,
             end.adaptation = FALSE)
  iter_needed <- 1000 + iter_needed
  if(iter_needed > 4000){break}
}

#Burn in
update(sim.mod.jags,
       n.iter = 3000)

#Extract samples
sim.mod.sam <- jags.samples(model = sim.mod.jags,
                           variable.names = "pi",
                           n.iter = 4000,
                           thin = 4)

jagsTime <- c(proc.time() - ptm)[3]
```

JAGS took 77.208 seconds. This time could possibly be reduced by optimizing burn in and adaptation and providing sensible initialization values.

To test for MCMC convergence, one can use the functions within the Coda R package. Be advised, that statistics should be calculated parameter-wise when there are many parameters, else memory requirements become burdensome. The following function can be used to accomplish this task.

```
#Compute the Gelman-Rubin and Geweke statistics
mcmcdiag <- function(x, nparams) {
  #x is an mcmc object
  #nparams is number of params in the object
  Gr <- vector(length = nparams)
  GK <- vector(length = nparams)
  k <- 1
  a <- character(0)

  while (k <= nparams) {
    m <- x[1:length(x)][, k]
```

```
gr <- gelman.diag(m)
print(paste("Feature", k, sep = " "))
print("Gelman-Rubin")
print(gr)
if (gr[[1]][1] <= 2) {
  Gr[k] <- "passed"
} else{
  Gr[k] <- "failed"
}

gk <- geweke.diag(m,
                  frac1 = 0.1,
                  frac2 = 0.5)
suspectGK <- names(which(2 * pnorm(-abs(gk[[1]]$z)) < 0.08))
if (identical(a, suspectGK)) {
  GK[k] <- "passed"
} else if (suspectGK == "var1") {
  GK[k] <- "failed"
}

k <- k + 1
}
return(list(Gr,
           GK))
}

diagout <- mcmcdiag(as.mcmc.list(sim.mod.sam$pi), dim(com)[2])
```

We have noticed that for large datasets (many thousands of parameters), JAGS can require many days to achieve convergence. By comparison, HMC is much faster. To avoid impractically long run times, VI may be the only viable option for extremely large data sets.

## Use of parameter estimates

Now we extract  $\pi$  parameters from each sampling group and subtract them. The location of zero within this distribution quantifies the probability of no effect of sampling group. If desired, the mean of this distribution of differences can be extracted and used as a point estimate for the effect of sampling group, though we advocate for using samples characterizing the entire distribution for analyses whenever possible, thus utilizing our measures of uncertainty. We present a simple function to determine if 95% or more of the distribution of differences lies on either side of zero. If so, then we suggest this is high certainty of an effect of sampling group on the relative abundance of that feature.

```
calc_certain_diffs <- function(mcmc_of_diffs, dimension){
  positives <- vector()
  negatives <- vector()

  for(i in 1:dim(mcmc_of_diffs)[dimension]){
    if(dimension == 2){
      perc <- length(which(mcmc_of_diffs[,i] > 0 )) / length(mcmc_of_diffs[,i])
    }else{
      perc <- length(which(mcmc_of_diffs[i,] > 0)) / length(mcmc_of_diffs[i,])
    }
    if(perc >= 0.95 | perc <= 0.05){
```

```
    positives <- c(positives, i)
  }else{
    negatives <- c(negatives, i)
  }
}
return(list(positives = positives,
           negatives = negatives))
}
est.pi <- extract(fitstan_HMC,"pi")
diffs_HMC <- est.pi$pi[,1,] - est.pi$pi[,2,]
outHMC <- calc_certain_diffs(diffs_HMC,2)

est.pi <- extract(fitstan_VI,"pi")
diffs_VI <- est.pi$pi[,1,] - est.pi$pi[,2,]
outVI <- calc_certain_diffs(diffs_VI,2)

diffs_jags <- sim.mod.sam$pi[1,,1:2] - sim.mod.sam$pi[2,,1:2]
outJAGS <- calc_certain_diffs(cbind(diffs_jags[, ,1],
                                   diffs_jags[, ,2]), 1)
```

Next we make a plot to determine which features shifted in relative abundances. Points correspond to estimated differences in feature relative abundance between sampling groups. The blue dots correspond with those features that we expected to shift. Lines extending from each point denote 95% high density intervals, and are colored purple for those features suggested to differ.

```
#Code from Kruschke's Doing Bayesian Data Analysis book (cited in main text).
HDIofMCMC = function(sampleVec, credMass=0.95) {

  # Computes highest density interval from a sample of representative values,
  # estimated as shortest credible interval.

  # Arguments:

  # sampleVec
  # is a vector of representative values from a probability distribution.

  # credMass
  # is a scalar between 0 and 1, indicating the mass within the credible
  # interval that is to be estimated.

  # Value:

  # HDIlim is a vector containing the limits of the HDI
  sortedPts = sort(sampleVec)

  ciIdxInc = ceiling(credMass * length(sortedPts))

  nCIs = length(sortedPts) - ciIdxInc

  ciWidth = rep(0, nCIs)
```

```
for(i in 1:nCIs) {  
  ciWidth[i]= sortedPts[i + ciIdxInc] - sortedPts[i]  
}  
  
HDImin = sortedPts[which.min(ciWidth)]  
HDImax = sortedPts[which.min(ciWidth) + ciIdxInc]  
HDIlim = c(HDImin, HDImax)  
  
return(HDIlim)  
}  
  
notus <- dim(com)[2]  
colorPoints <- rep("black", notus)  
colorPoints[c(1:5,(notus-4):notus)] <- "blue"  
  
#Plot differences in pis  
plotr <- function(x, y, z, whatitis){  
  plot(1:notus, apply(x, y, mean),  
       cex = 1.5,  
       ylim = c(-0.06,0.06),  
       ylab = "Difference in rel. abund.",  
       xlab = "Feature",  
       main = whatitis,  
       pch = 16,  
       col = colorPoints,  
       las = 2)  
  abline(h = 0, col = "red")  
  segs <- apply(x, y, HDIofMCMC)  
  colorLines <- rep("black", notus)  
  colorLines[z$positives] <- "purple"  
  segments(1:notus, segs[1,],  
           1:notus, segs[2,],  
           col = colorLines)  
}  
  
par(mfrow=c(1,3))  
plotr(x = diffs_VI, y = 2, z = outVI, whatitis = "VI")  
plotr(x = diffs_HMC, y = 2, z = outHMC, whatitis = "HMC")  
plotr(x = diffs_jags, y = 1, z = outJAGS, whatitis = "JAGS")
```

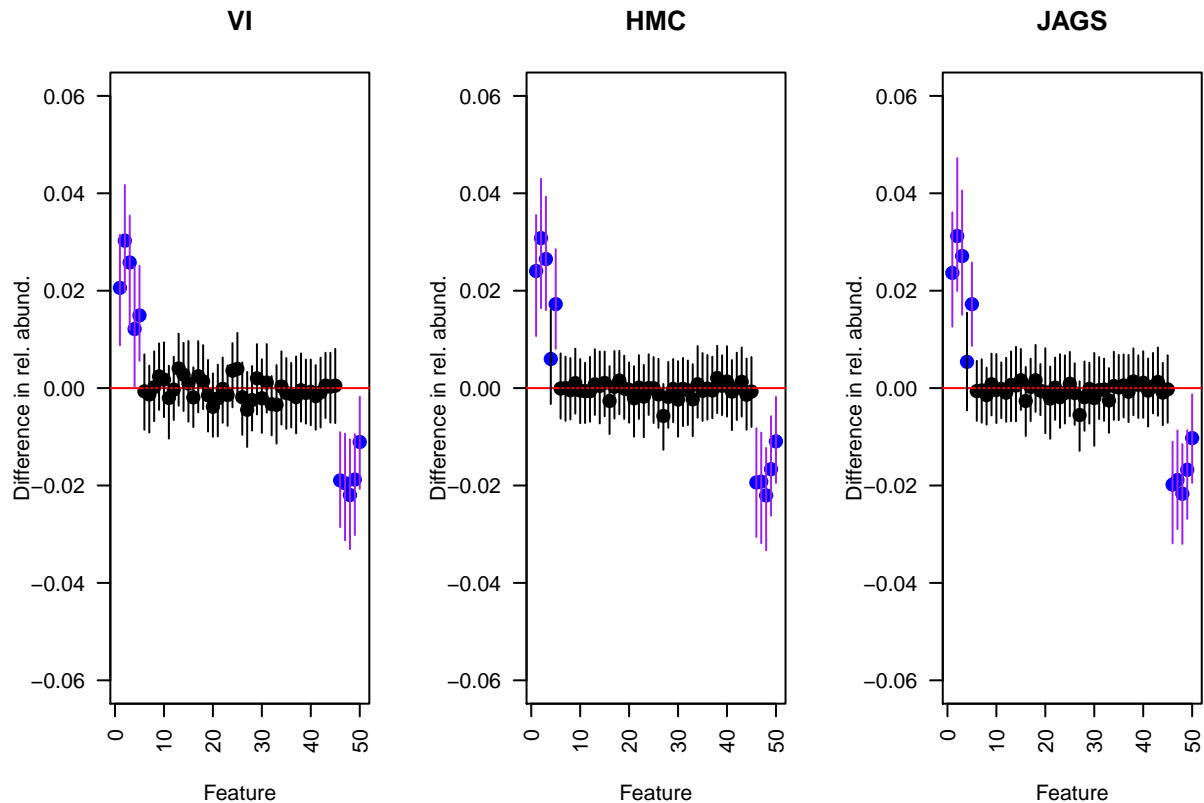

DMM can be extended easily to encompass more than two sampling groups. Simply order data (in a matrix or dataframe format) so that replicates from the same sampling groups are neighboring rows. For instance, say one was analyzing measurements from eight sampling groups denoted numerically. One should order the associated data for these sampling groups like so that the data looked like this:

```
exampleData <- round(runif(16,1,1000))
groups <- c(rep("group1",2),
            rep("group2",2),
            rep("group3",2),
            rep("group4",2),
            rep("group5",2),
            rep("group6",2),
            rep("group7",2),
            rep("group8",2))
cbind(exampleData, groups)
```

```
##      exampleData groups
## [1,] "766"      "group1"
## [2,] "347"      "group1"
## [3,] "134"      "group2"
## [4,] "686"      "group2"
## [5,] "90"       "group3"
## [6,] "539"      "group3"
## [7,] "244"      "group4"
## [8,] "799"      "group4"
## [9,] "232"      "group5"
## [10,] "349"     "group5"
## [11,] "751"     "group6"
## [12,] "936"     "group6"
## [13,] "586"     "group7"
```

```
## [14,] "201"      "group7"  
## [15,] "940"      "group8"  
## [16,] "865"      "group8"
```

Then one can simply pass in the indices that describe which rows bound which group to the “start” and “end” portions of the function. For our toy example, the start indices would be:

```
c(1,3,5,7,9,11,13,15)
```

```
## [1] 1 3 5 7 9 11 13 15
```

and the end indices would be:

```
c(2,4,6,8,10,12,14,16)
```

```
## [1] 2 4 6 8 10 12 14 16
```

These values would then be substituted into the model and the “N” parameter changed to reflect the number of sampling groups used (in this case  $N = 8$ ). Note that you cannot pass in the grouping column if it is included in your data. See above for another example of how data should be formatted.

```
fitstan_HMC <- sampling(DM,  
  data = list("datamatrix" = as.matrix(exampleData),  
    "nreps" = 16,  
    "notus" = 1,  
    "N" = 8,  
    "start" = c(1,3,5,7,9,11,13,15),  
    "end" = c(2,4,6,8,10,12,14,16)  
  ),  
  chains=2,  
  warmup = 500,  
  iter = 1000,  
  thin = 2,  
  algorithm = "NUTS",  
  cores = 1,  
  pars <- "pi",  
  verbose = T)
```
